# Supplementary material for: Novel sulfonamide derivatives as multitarget antidiabetic agents: design, synthesis, and biological evaluation
Source: Royal Society of Chemistry journal article supplement (doi:10.1039/d4ra01060d), 2024-01-01
Supplement: d4ra01060d1.pdf [file d4ra01060d1.pdf]

## Supporting information

### " Novel sulfonamide derivatives as multitarget antidiabetic agents: Design, synthesis, and biological evaluation "

Mohammed Salah Ayoup\*<sup>1,2</sup>, Nourhan Khaled<sup>1</sup>, Hamida Abdel-Hamid<sup>1</sup>, Doaa A Ghareeb<sup>3</sup>, Samah A. Nasr<sup>3</sup>, Ahmed Omer<sup>4,5</sup>, Amr Sonousi<sup>6,7</sup>, Asmaa E. Kassab\*<sup>6</sup>, Abdelazeem S. Eltaweil<sup>1,8</sup>

<sup>1</sup> Department of Chemistry, Faculty of Science, Alexandria University, Alexandria, Egypt.

<sup>2</sup> Department of Chemistry, College of Science, King Faisal University, Al-Ahsa 31982, Saudi Arabia.

<sup>3</sup> Bio-screening and preclinical trial lab, Biochemistry Department, Faculty of Science, Alexandria University, Alexandria, Egypt.

<sup>4</sup> Polymer Institute of the Slovak Academy of Sciences, Dúbravská Cesta 9, 845 41 Bratislava, Slovakia.

<sup>5</sup> Polymer Materials Research Department, Advanced Technology and New Materials Research Institute (ATNMRI), City of Scientific Research and Technological Applications (SRTA-City), New Borg El-Arab City, Alexandria 21934, Egypt

<sup>6</sup> Department of Pharmaceutical Organic Chemistry, Faculty of Pharmacy, Cairo University, Kasr El-Aini Street, Cairo, P.O. Box 11562, Egypt.

<sup>7</sup> University of Hertfordshire hosted by Global Academic Foundation, New Administrative Capital, Cairo, Egypt.

<sup>8</sup> Department of Engineering, Faculty of Technology and Engineering, University of Technology and Applied Sciences, Sultanate of Oman.

\*Corresponding authors: Email addresses: [mayoup@kfu.edu.sa](mailto:mayoup@kfu.edu.sa) & [mohammedsalahayoup@gmail.com](mailto:mohammedsalahayoup@gmail.com),  
[asmaa.kassab@pharma.cu.edu.eg](mailto:asmaa.kassab@pharma.cu.edu.eg)

## **Contents**

|                                                                                                              |                |
|--------------------------------------------------------------------------------------------------------------|----------------|
| 1. $^1\text{H}$ , $^{13}\text{C}$ NMR and IR spectra of the synthesized compounds (Figures 1-48)             | <b>S3-S48</b>  |
| 2. Equipment and analytical technique                                                                        | <b>S51</b>     |
| 3. Biological procedures                                                                                     | <b>S52</b>     |
| 4. 2D diagram and 3D representation of molecular docking of all compounds in the binding pocket (PDB: 2QMJ). | <b>S54</b>     |
| 5. Biological activities detailed results                                                                    | <b>S60-S63</b> |
| 6. References                                                                                                | <b>S63</b>     |

1.  $^1\text{H}$ ,  $^{13}\text{C}$  NMR and IR spectra of the synthesized compounds (Figures 1-48)

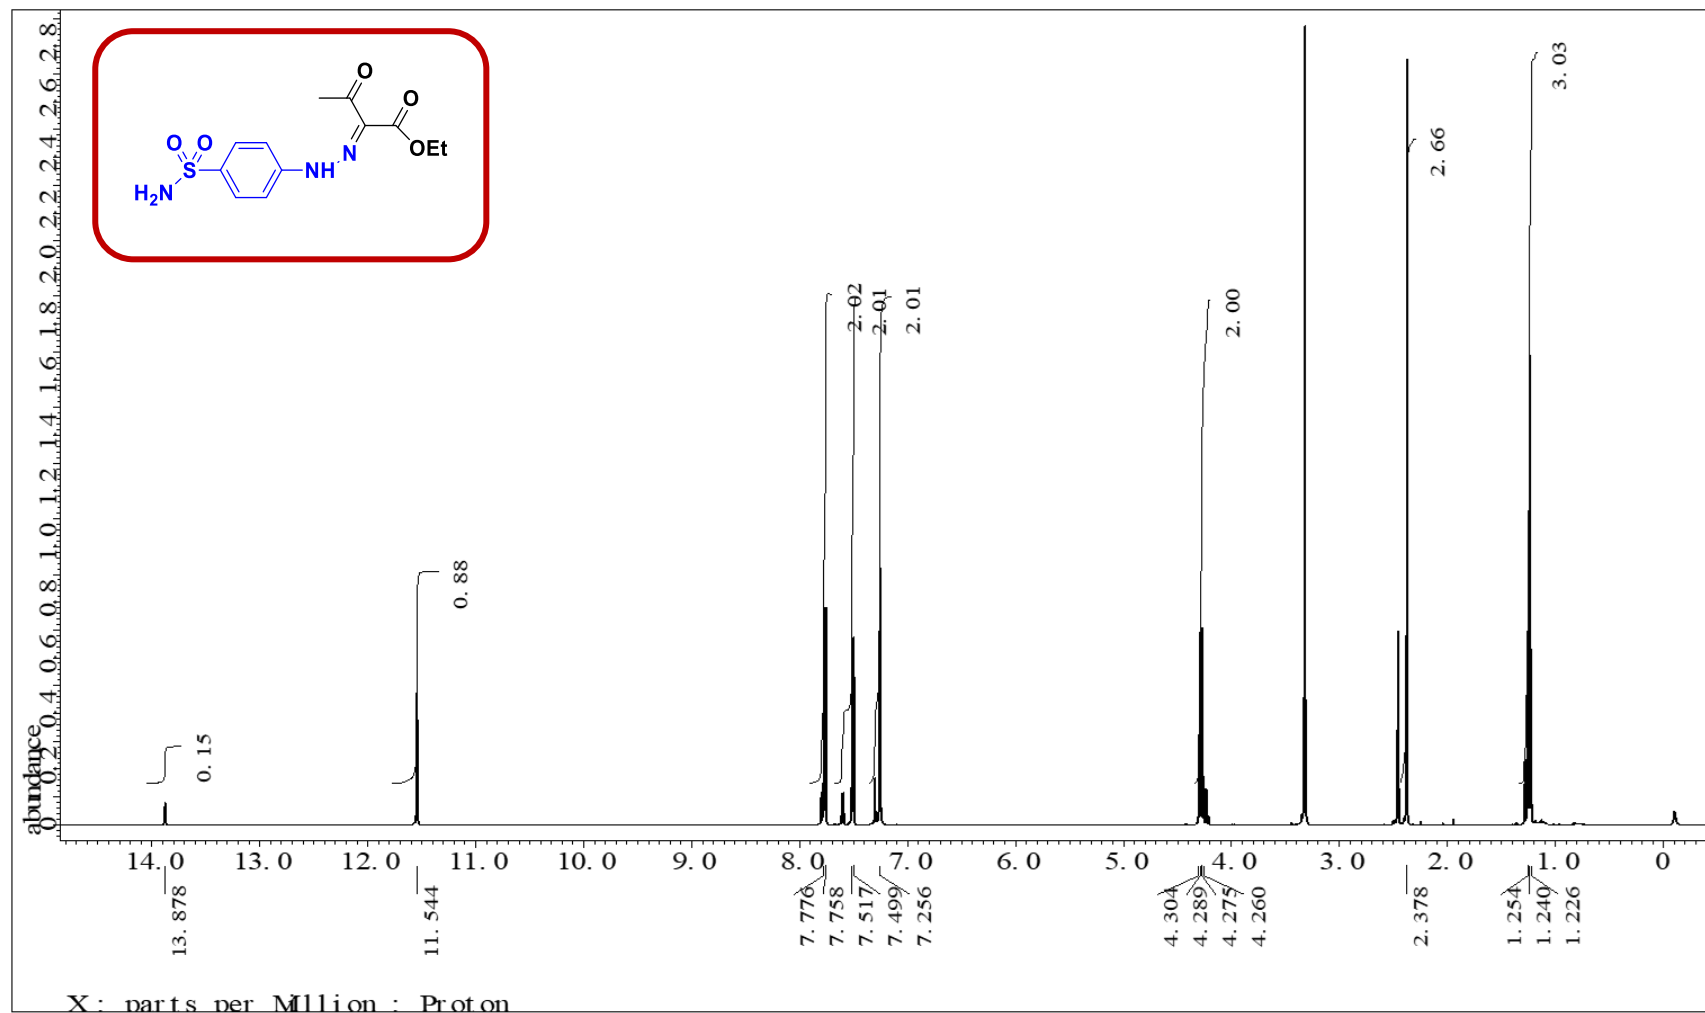

Fig. 1  $^1\text{H}$ -NMR spectrum (500 MHz,  $\text{DMSO-d}_6$ ) of **2**.

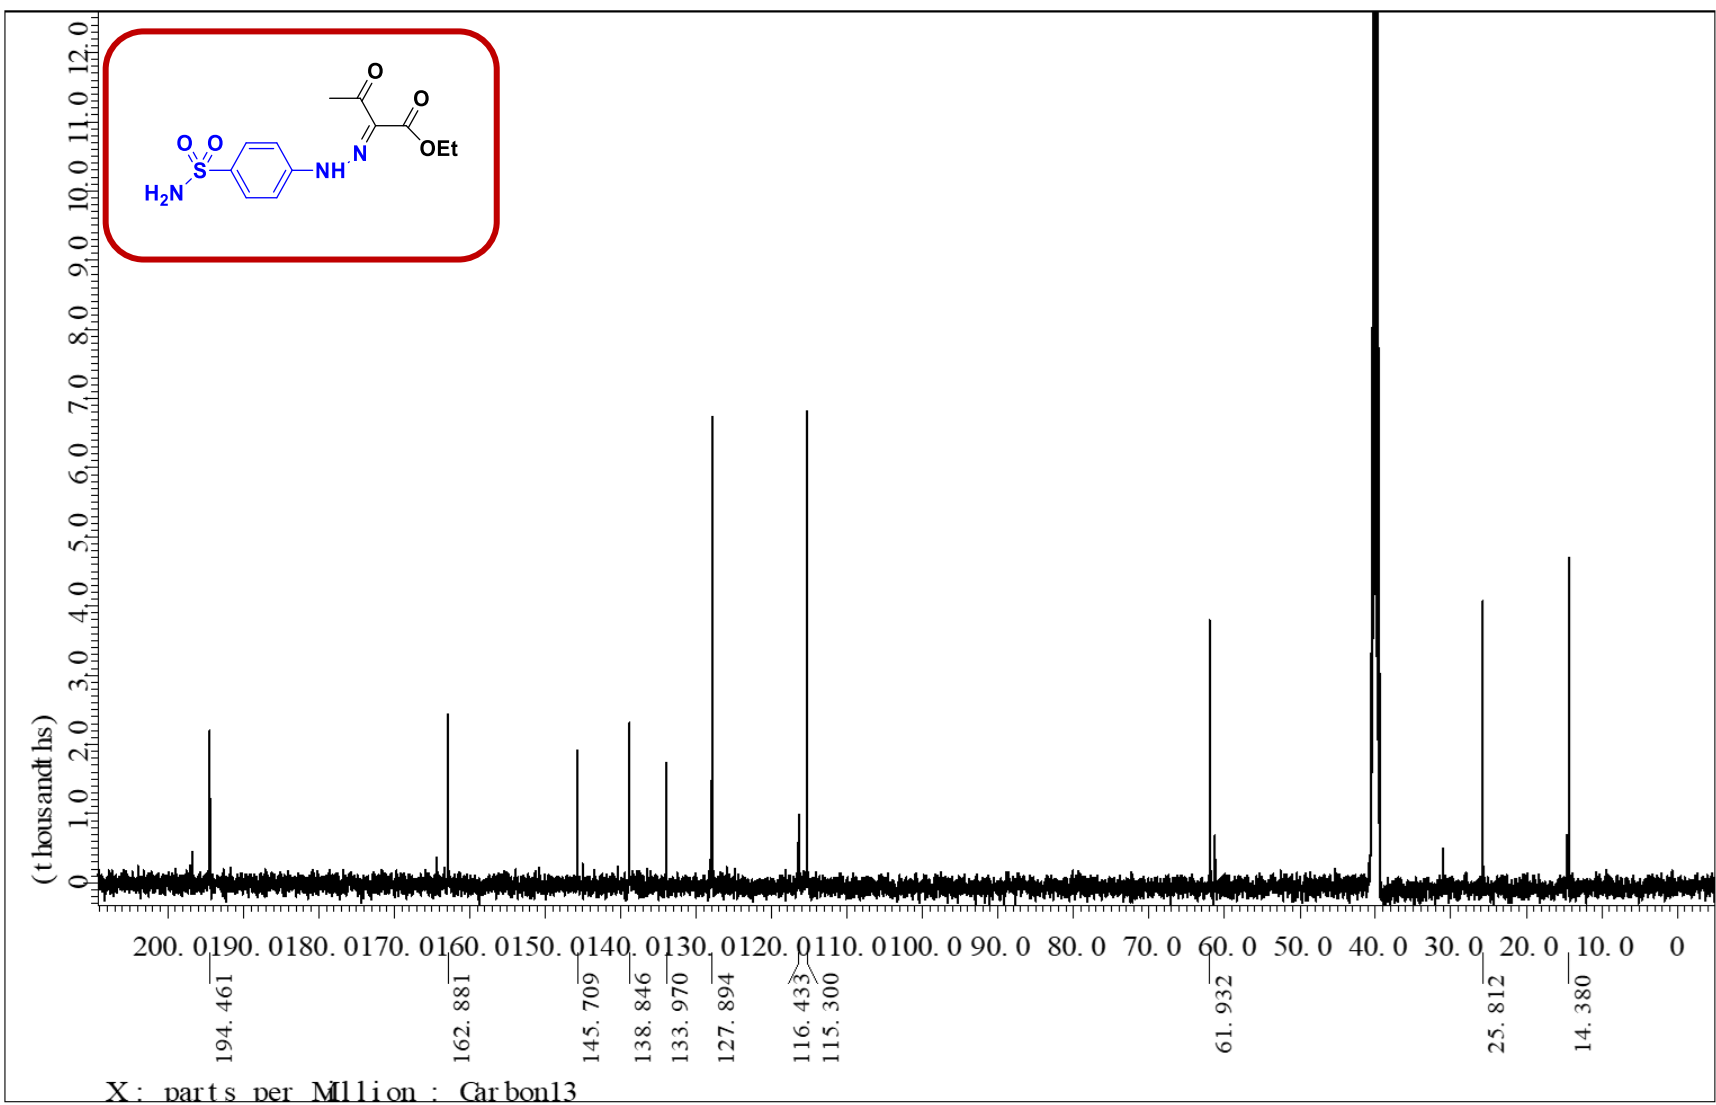

**Fig. 2**  $^{13}\text{C}$ -NMR spectrum (125 MHz,  $\text{DMSO-d}_6$ ) of **2**.

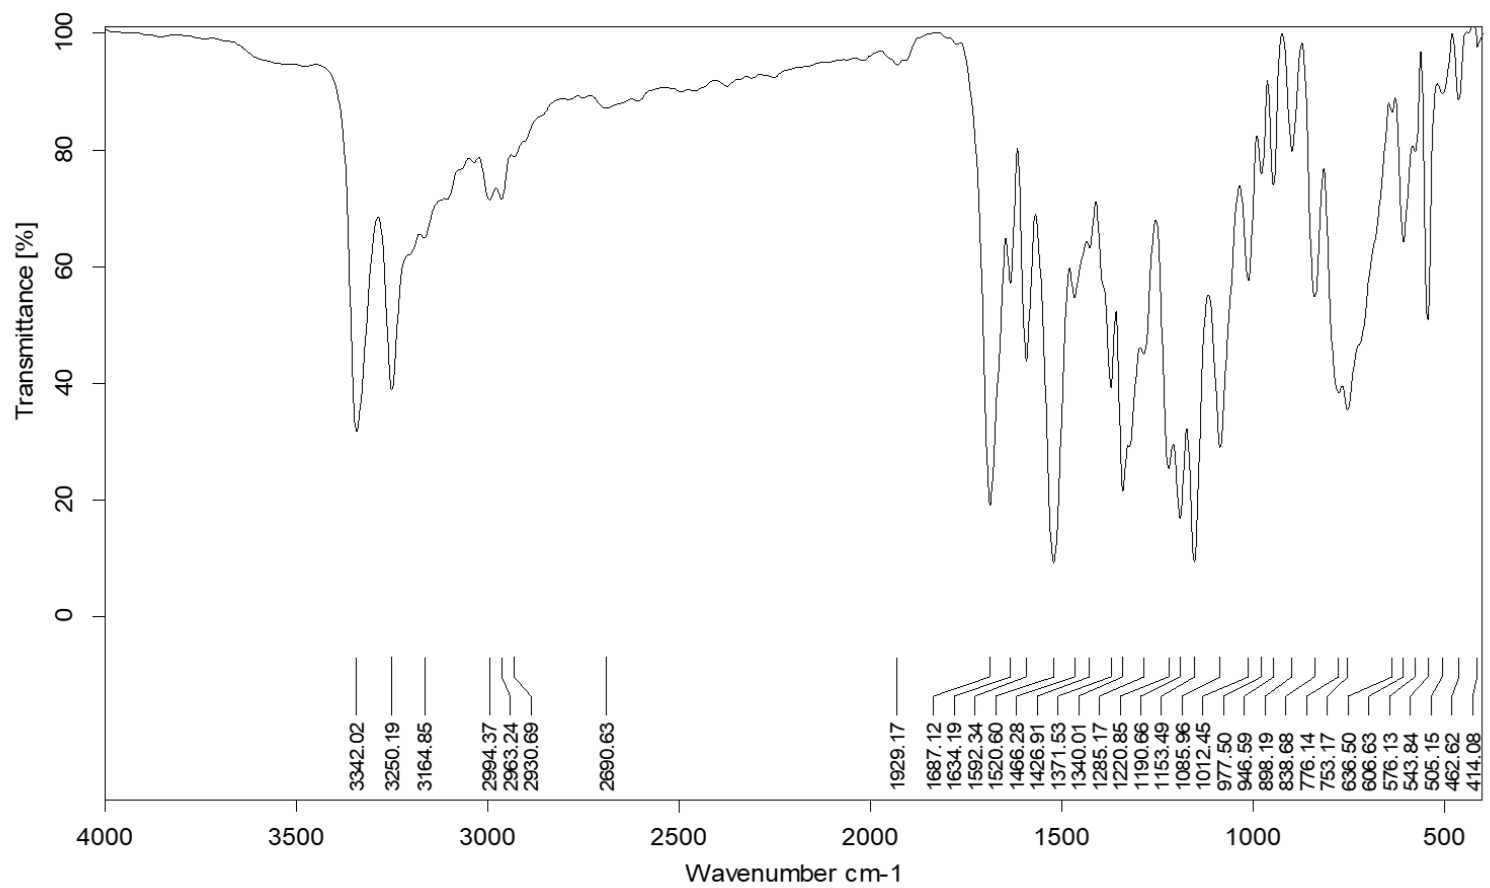

**Fig. 3** IR spectrum of **2**.

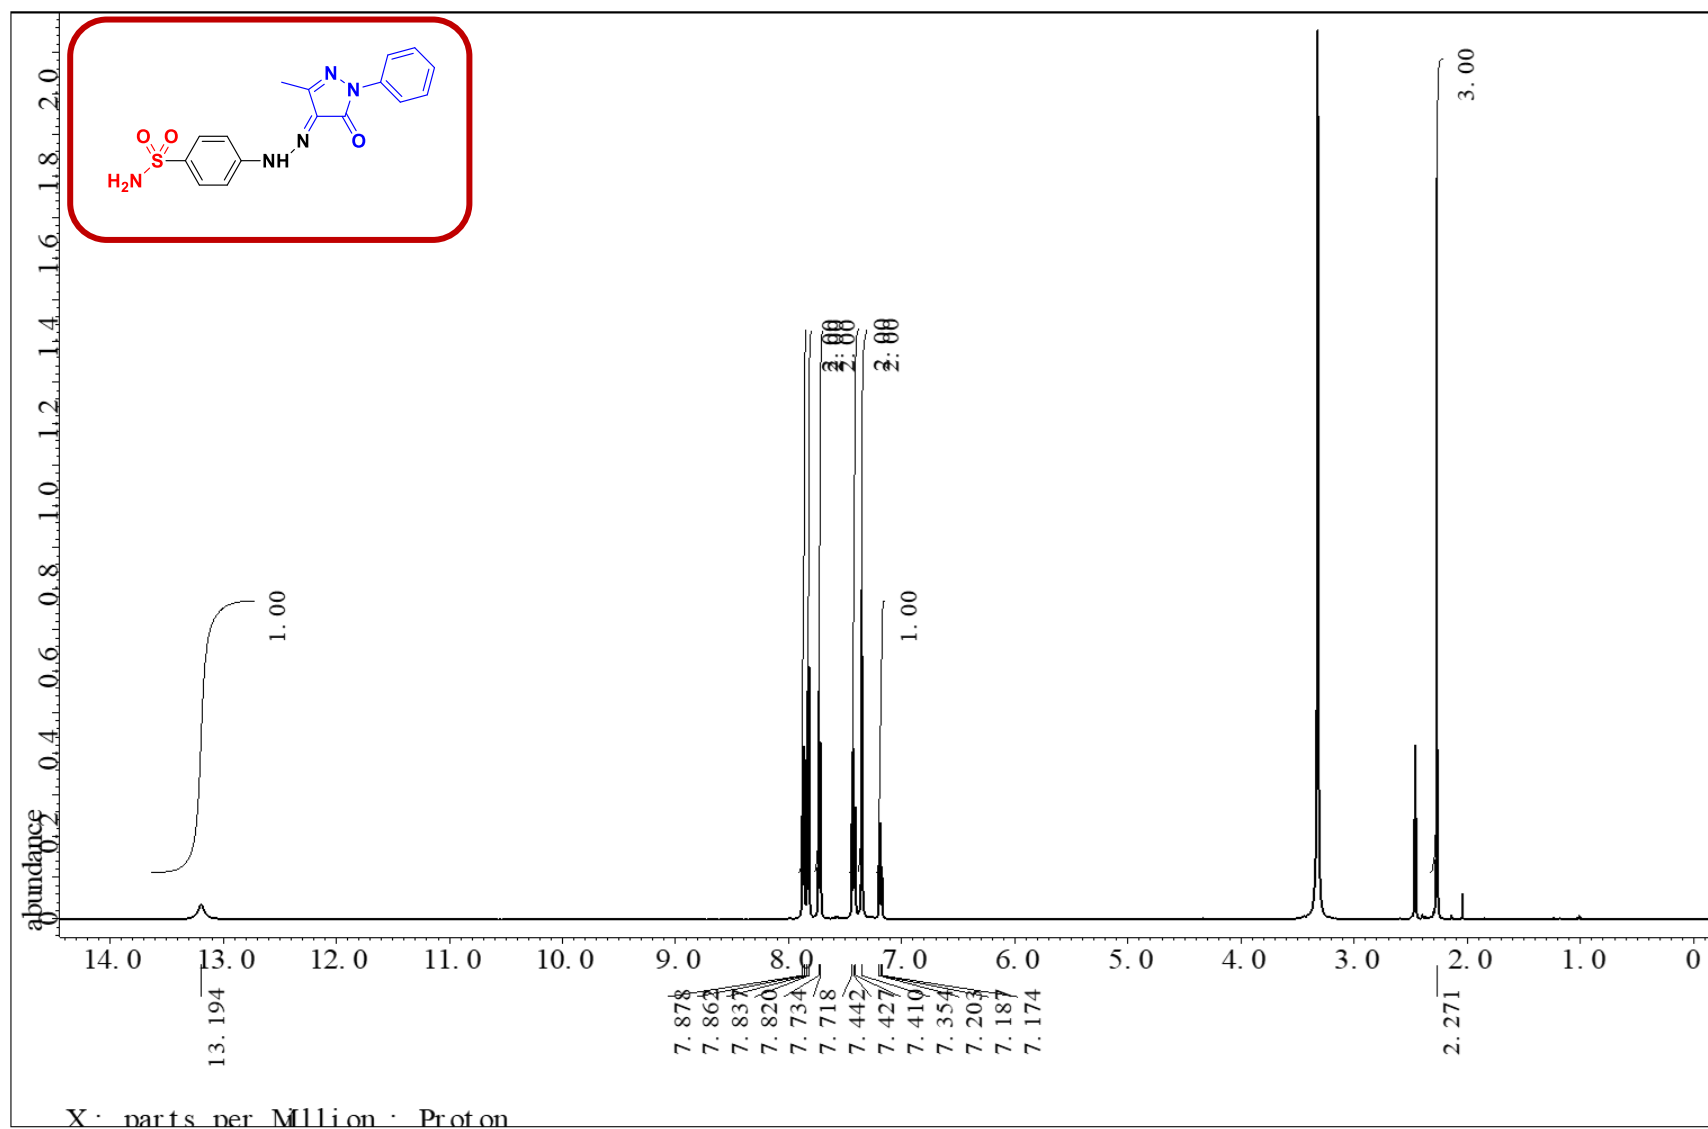

Fig. 4  $^1\text{H-NMR}$  spectrum (500 MHz,  $\text{DMSO-d}_6$ ) of 3a.

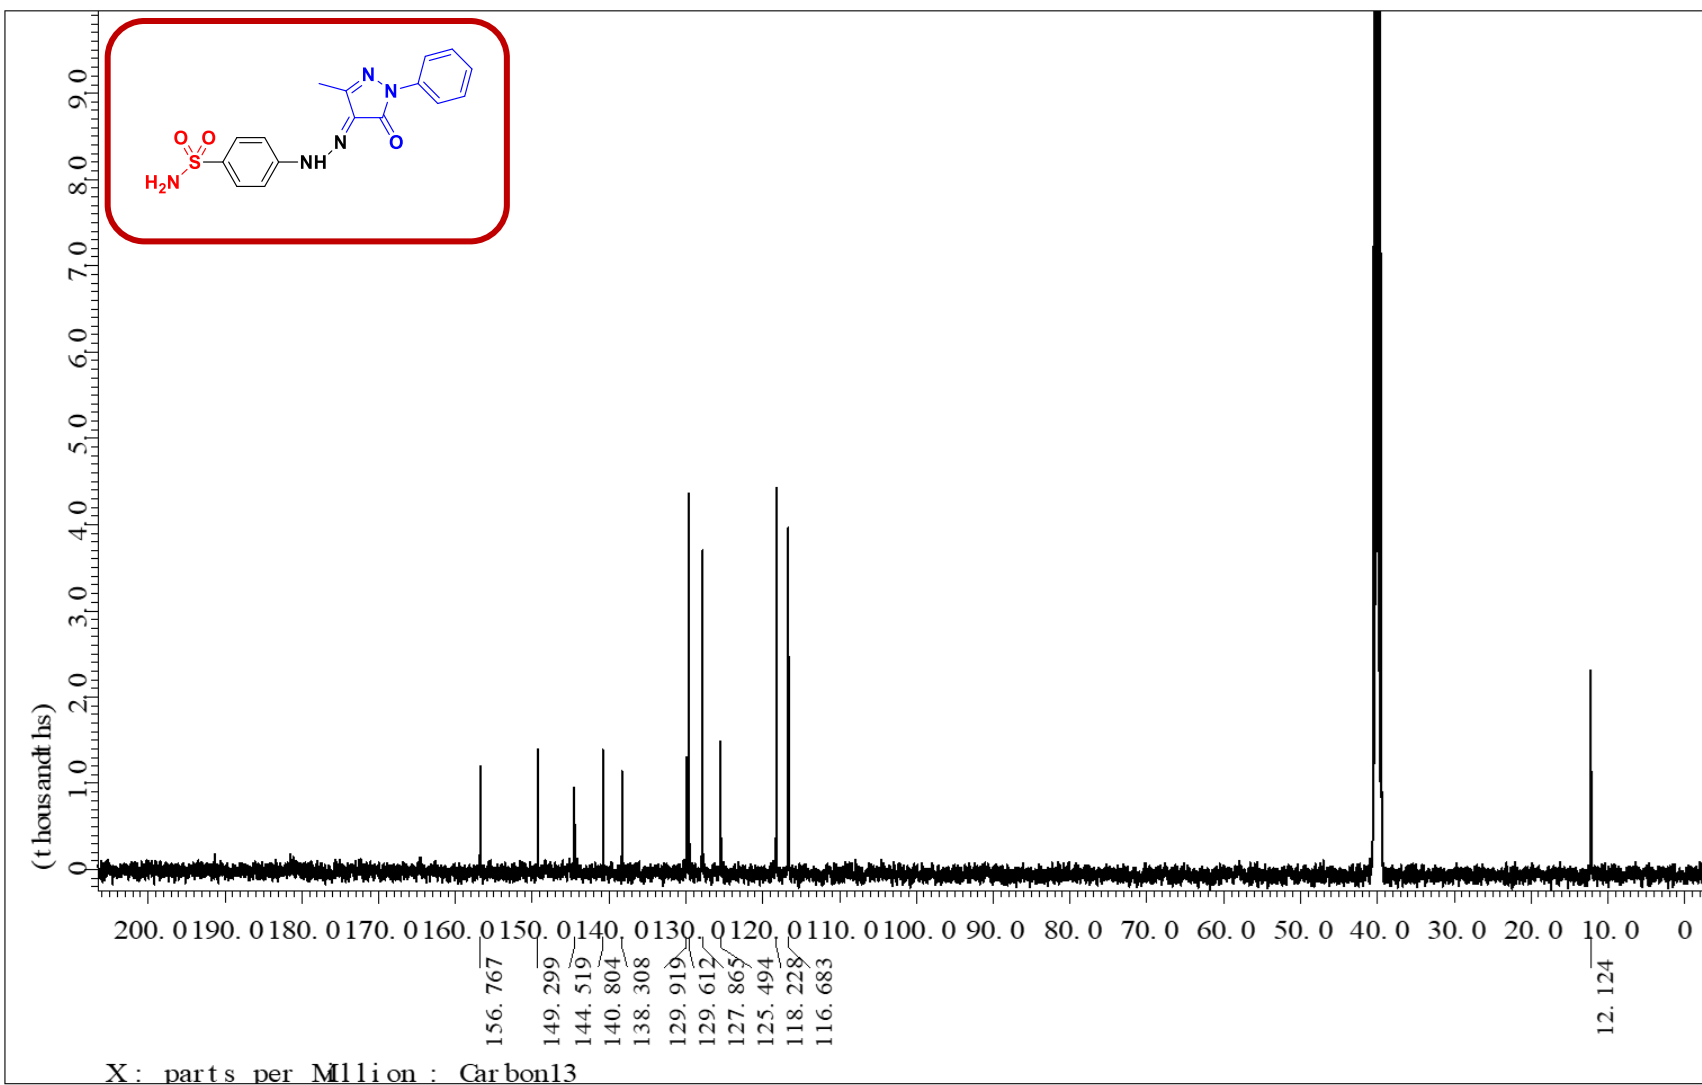

**Fig. 5**  $^{13}\text{C}$ -NMR spectrum (125 MHz, DMSO- $d_6$ ) of 3a.

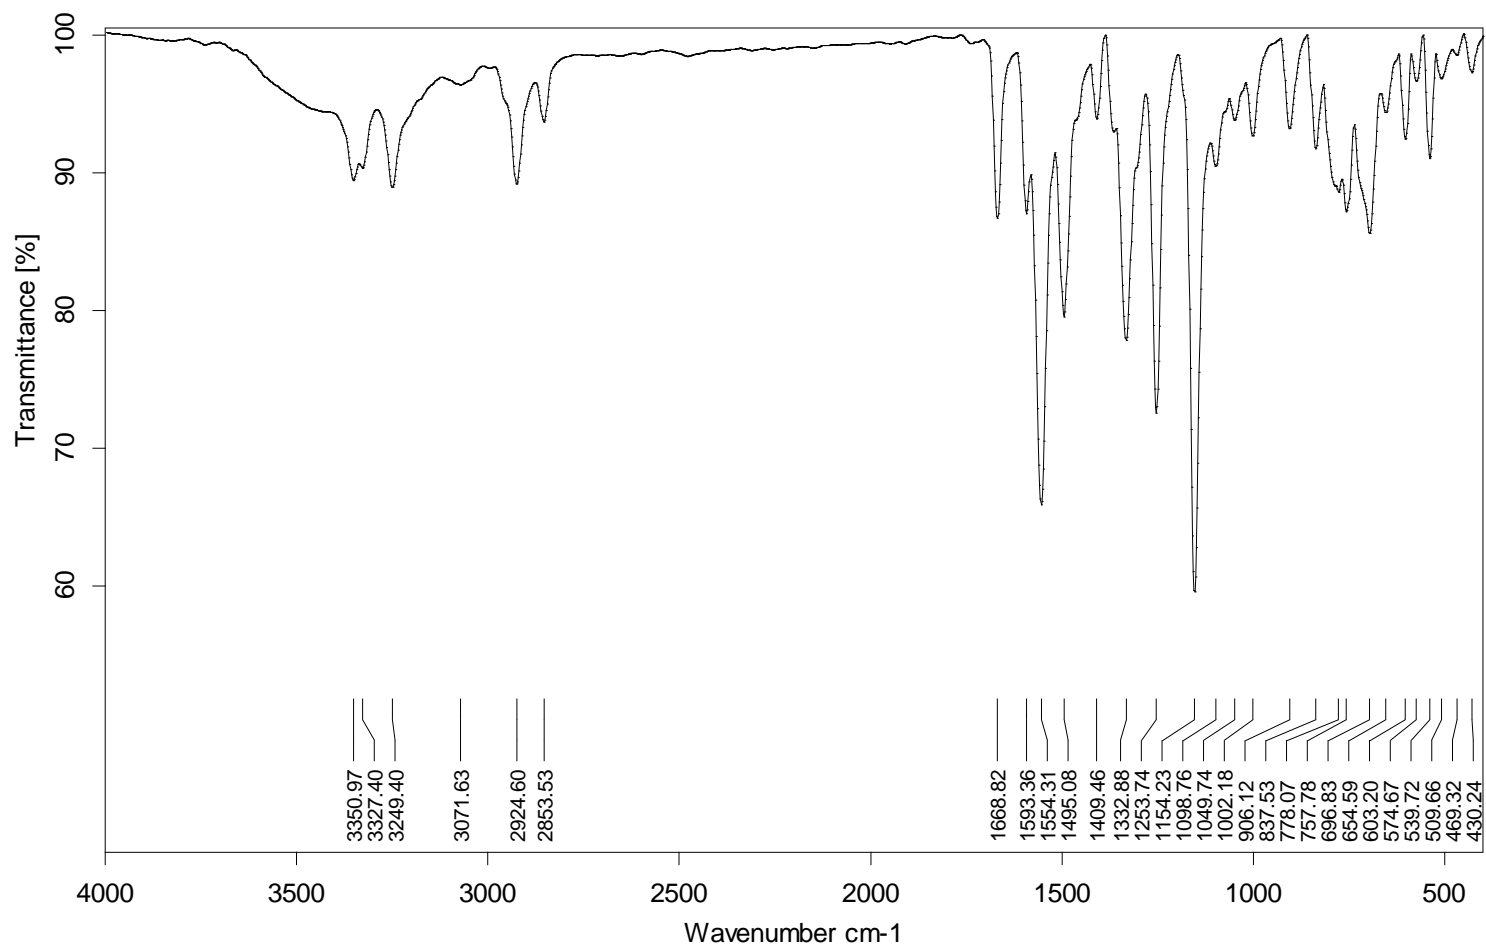

**Fig. 6** IR spectrum of **3a**.



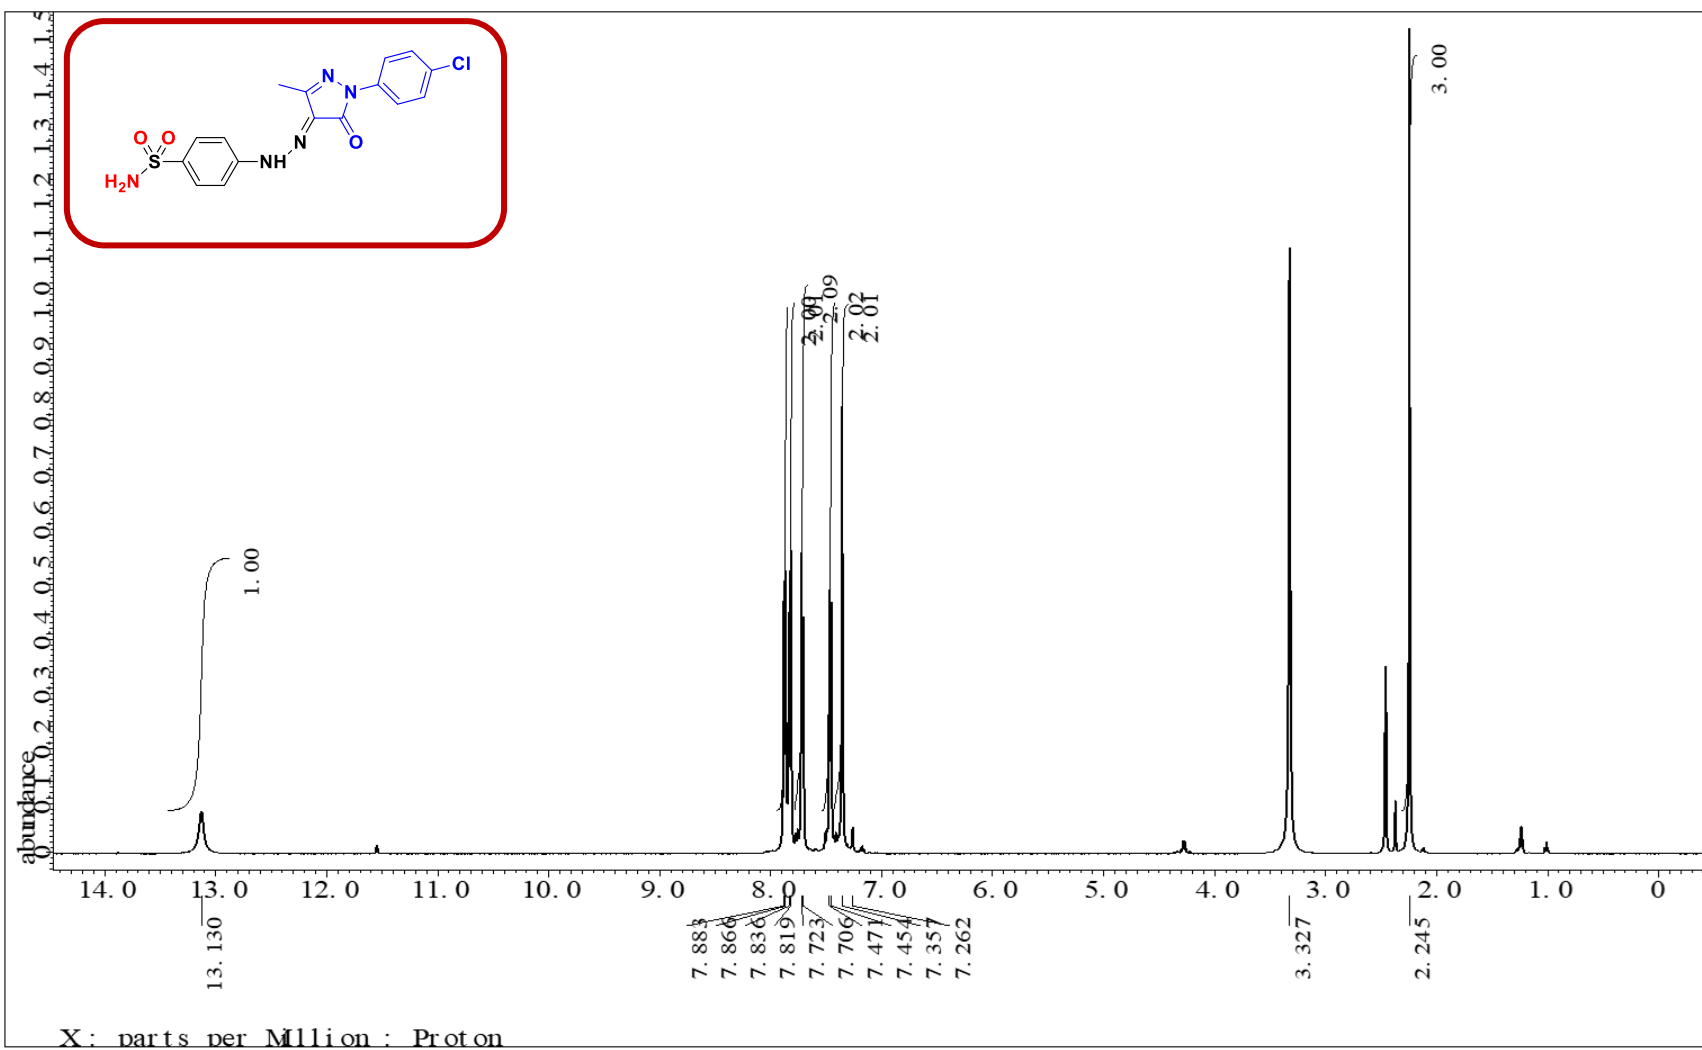

Fig. 7  $^1\text{H-NMR}$  spectrum (500 MHz,  $\text{DMSO-d}_6$ ) of 3b.

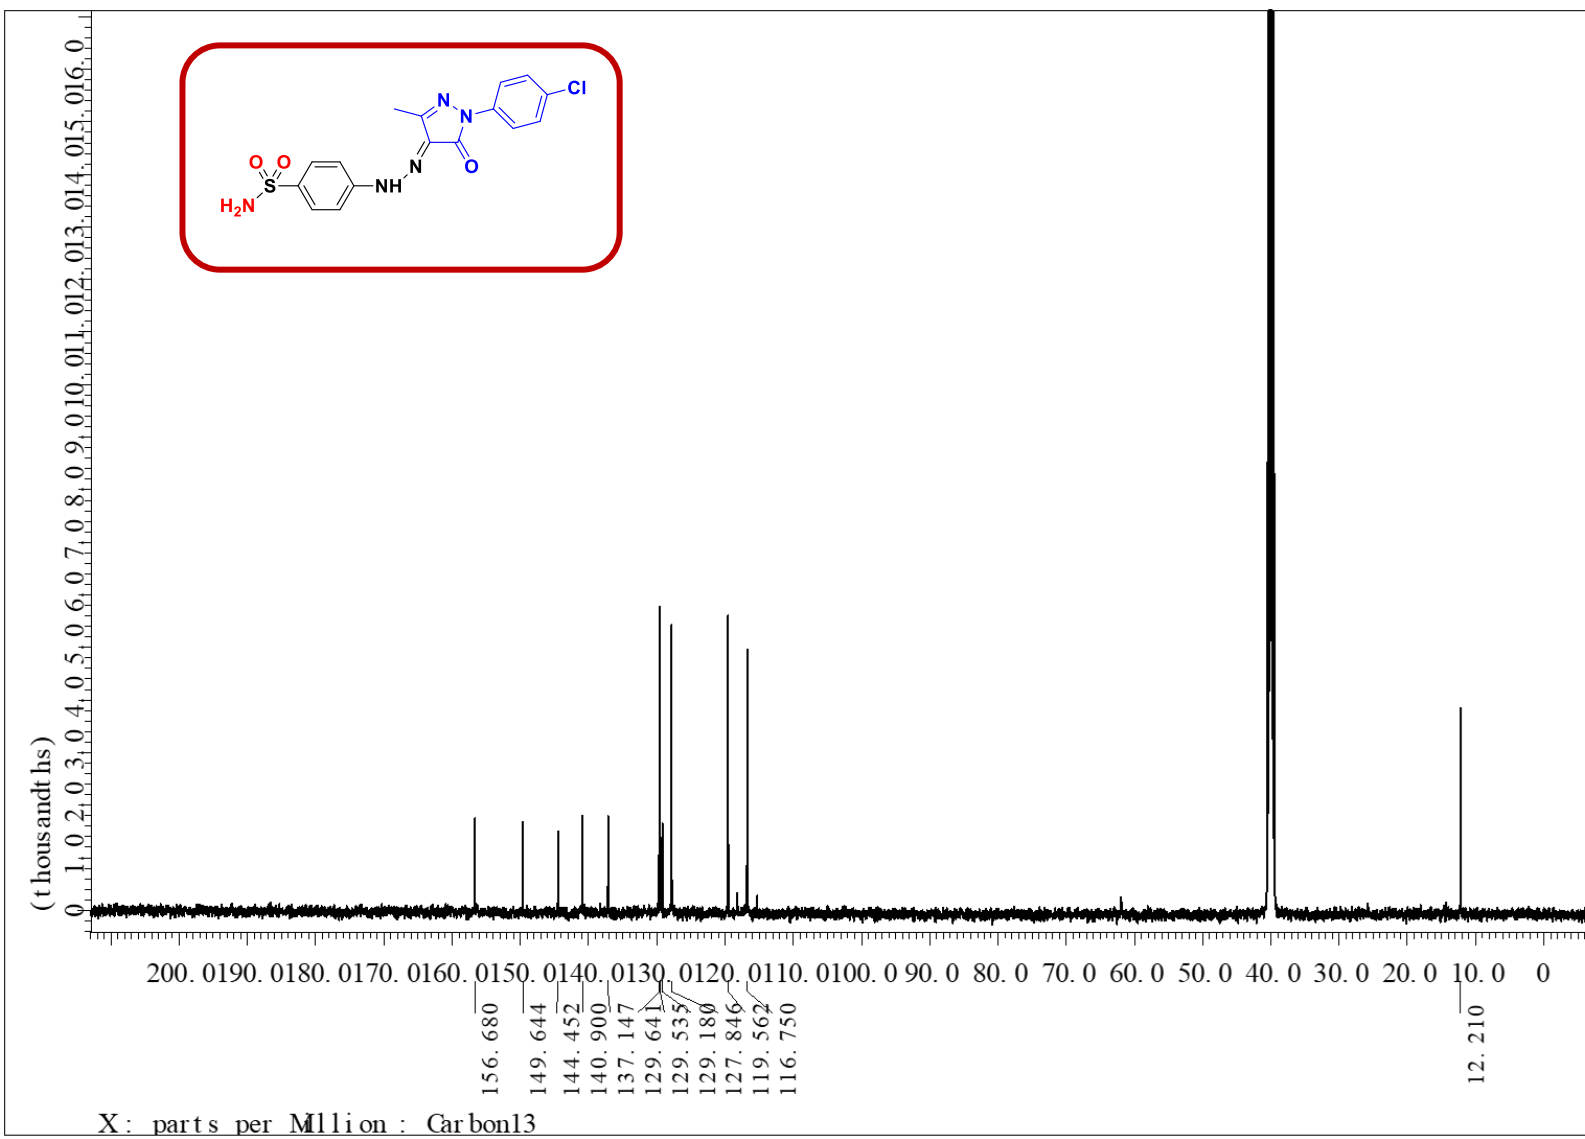

**Fig. 8**  $^{13}\text{C}$ -NMR spectrum (125 MHz, DMSO- $d_6$ ) of **3b**.

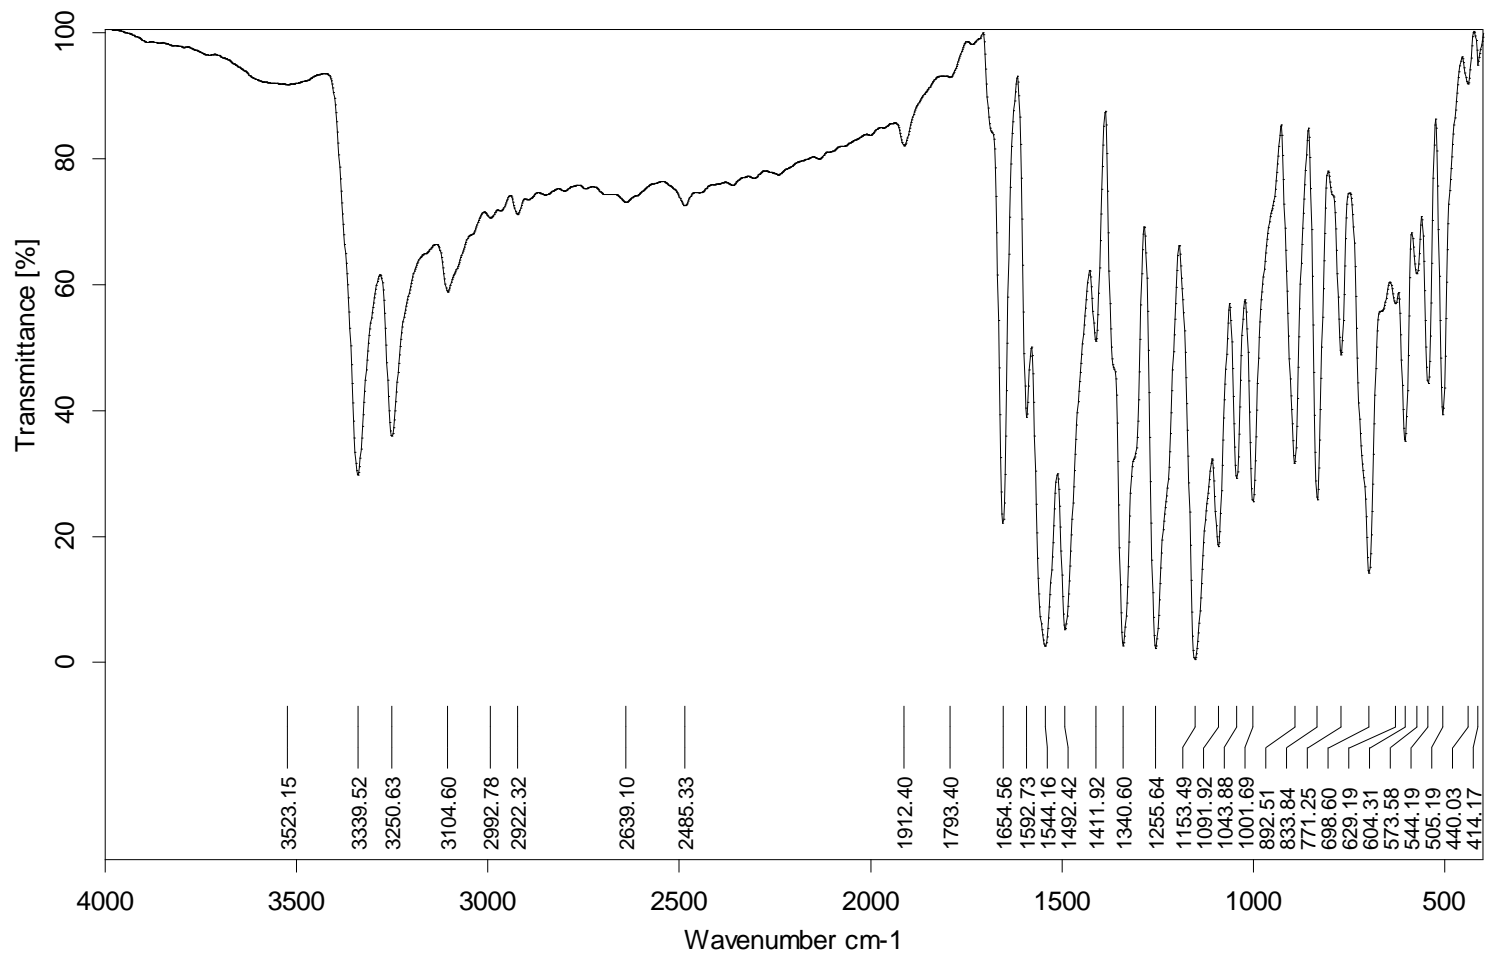

**Fig. 9** IR spectrum of **3b**.

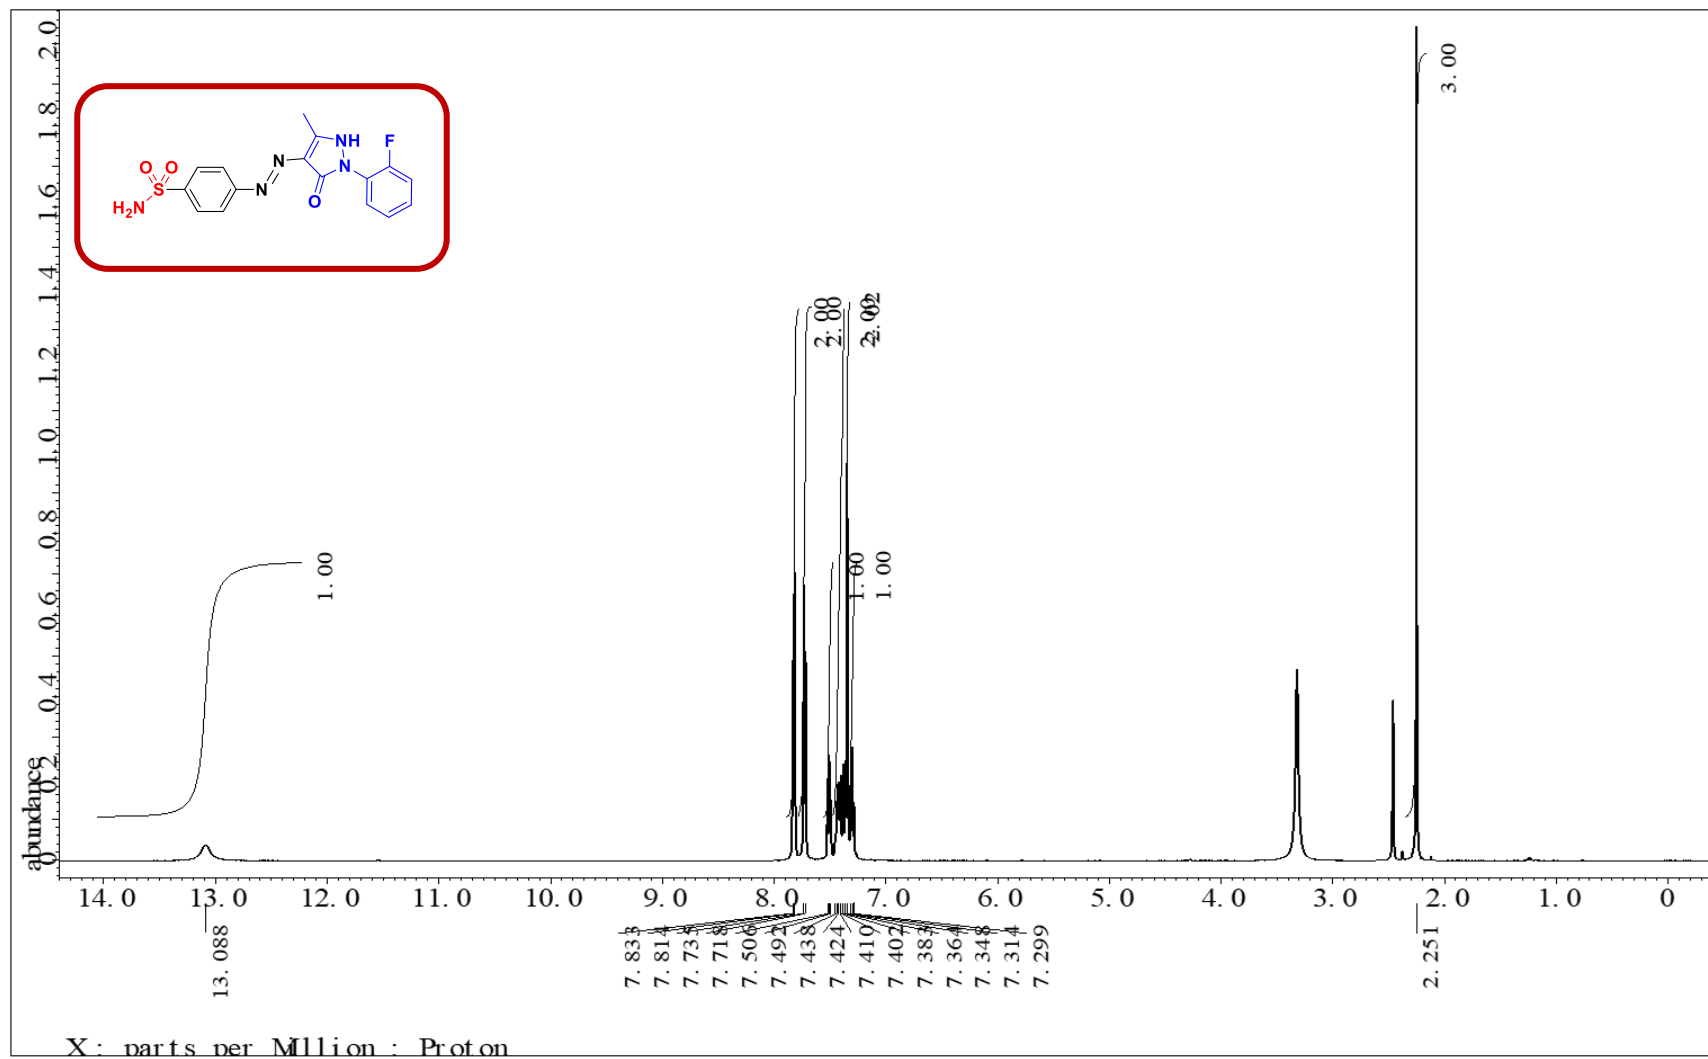

**Fig. 10** <sup>1</sup>H-NMR spectrum (500 MHz, DMSO-d<sub>6</sub>) of **3c**.

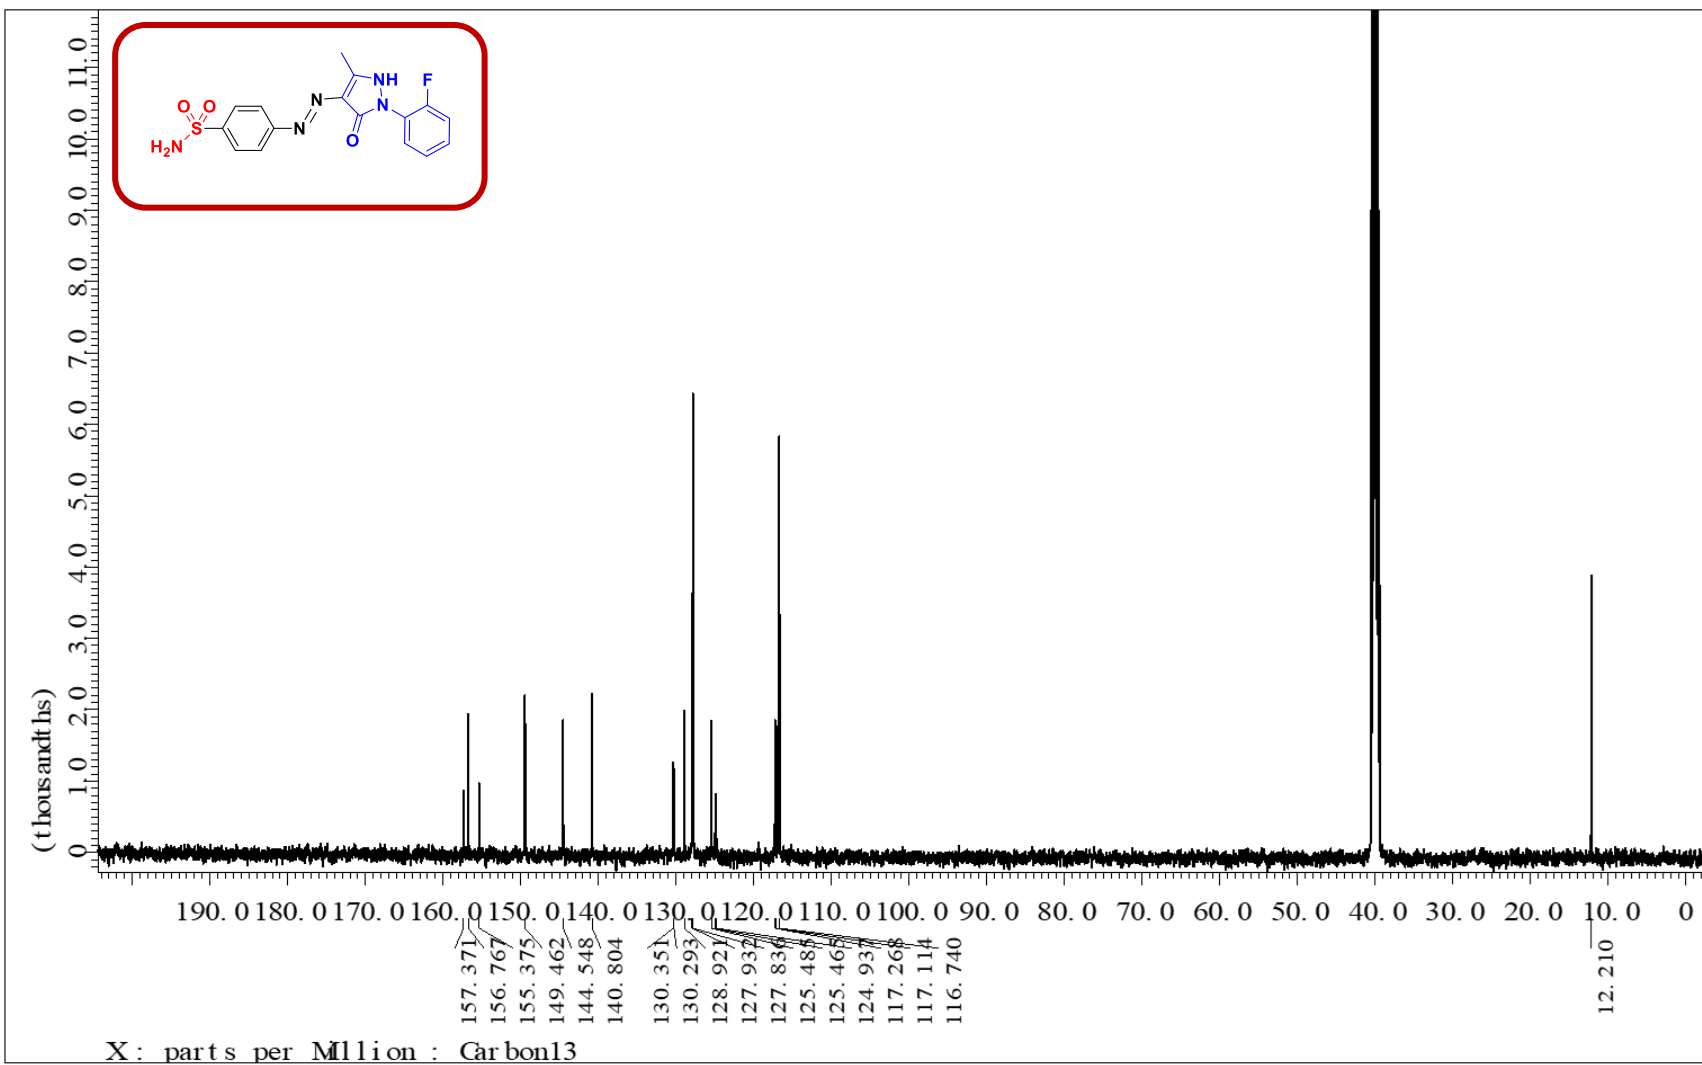

**Fig. 11**  $^{13}\text{C}$ -NMR spectrum (125 MHz, DMSO- $d_6$ ) of **3c**.

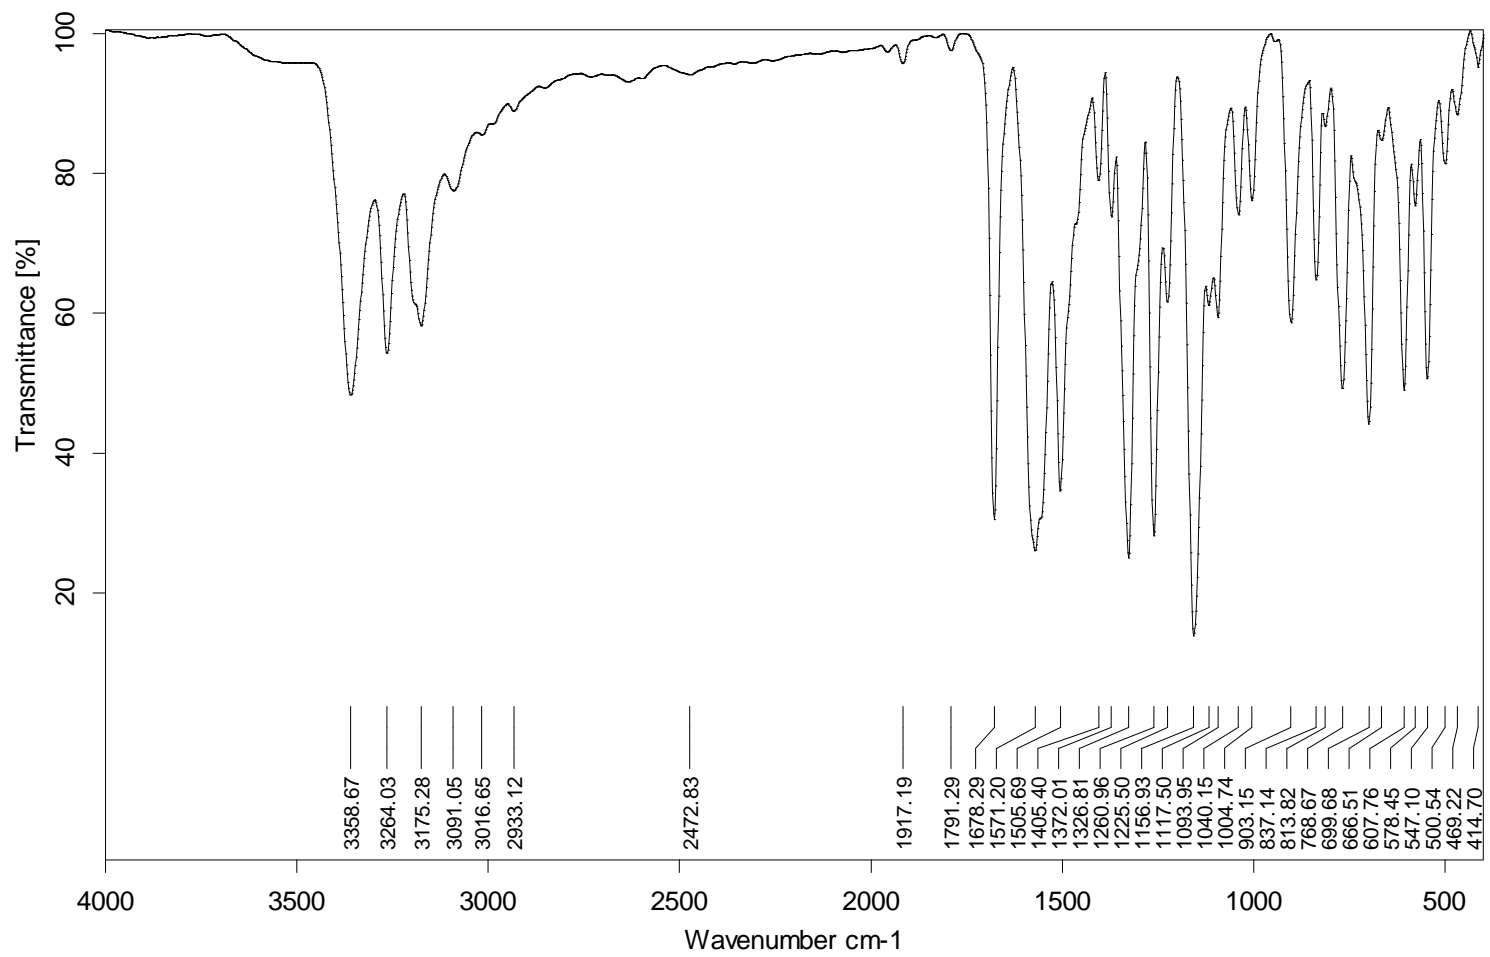

**Fig. 12** IR spectrum of **3c**.

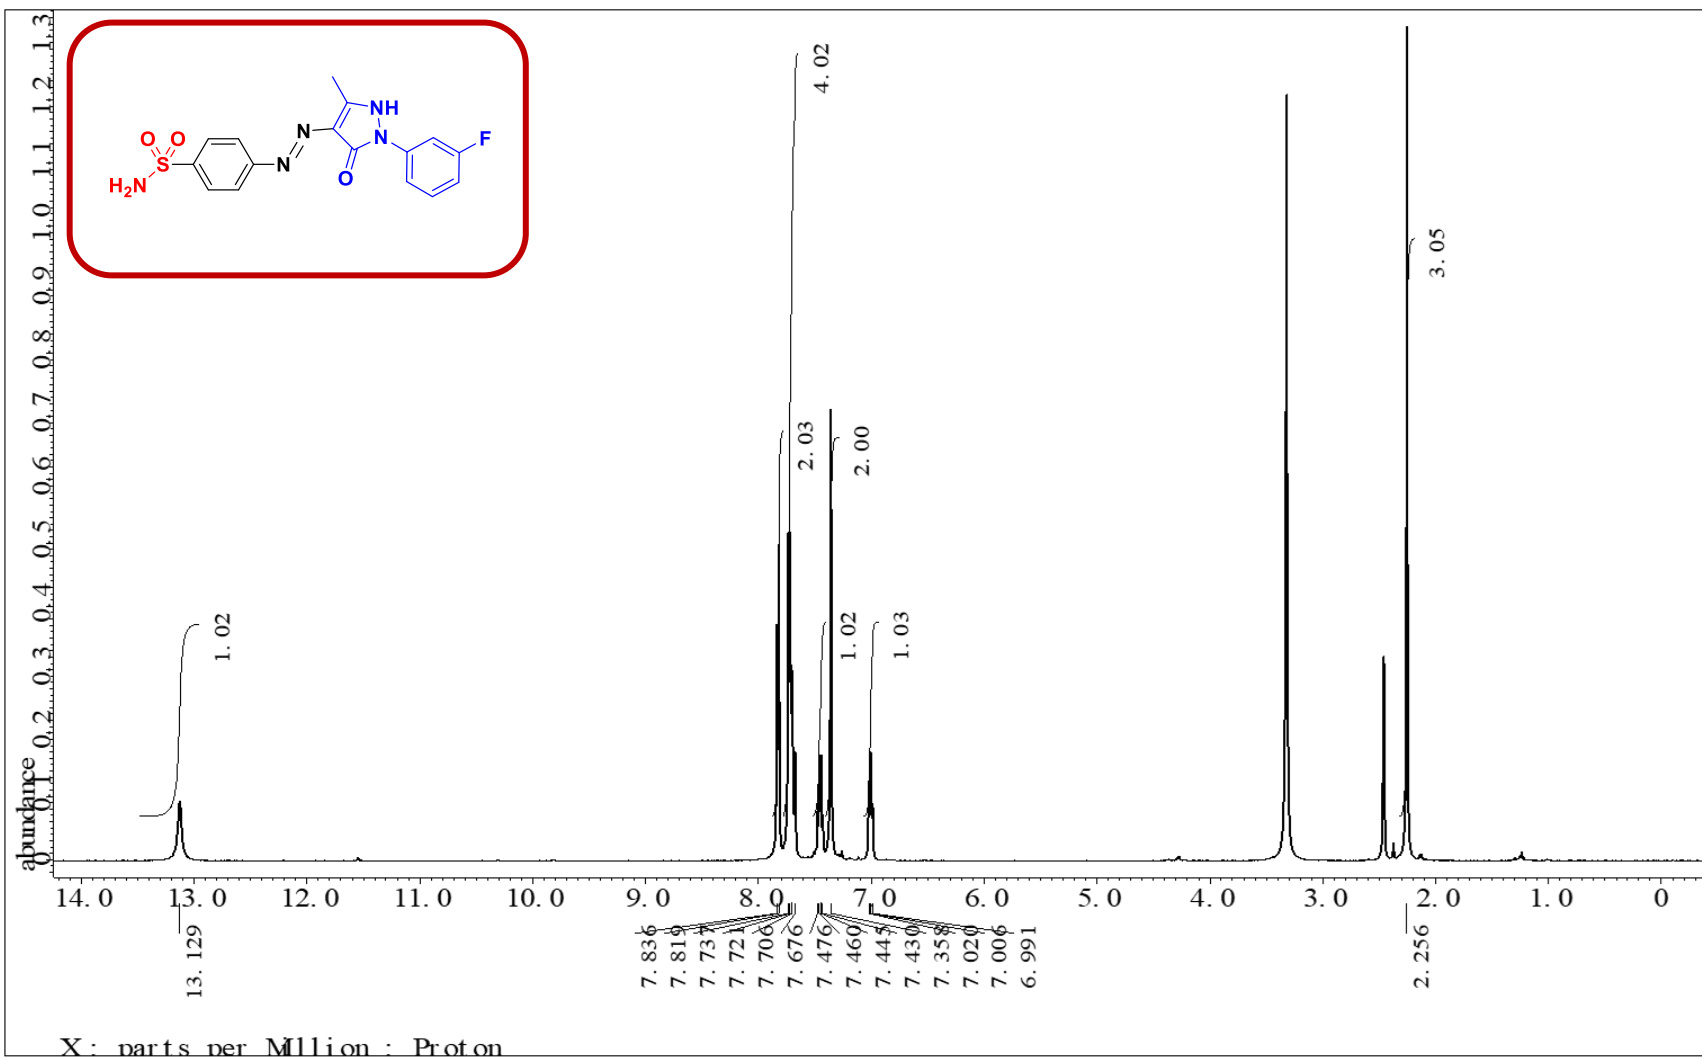

**Fig. 13** <sup>1</sup>H-NMR spectrum (500 MHz, DMSO-d<sub>6</sub>) of **3d**.

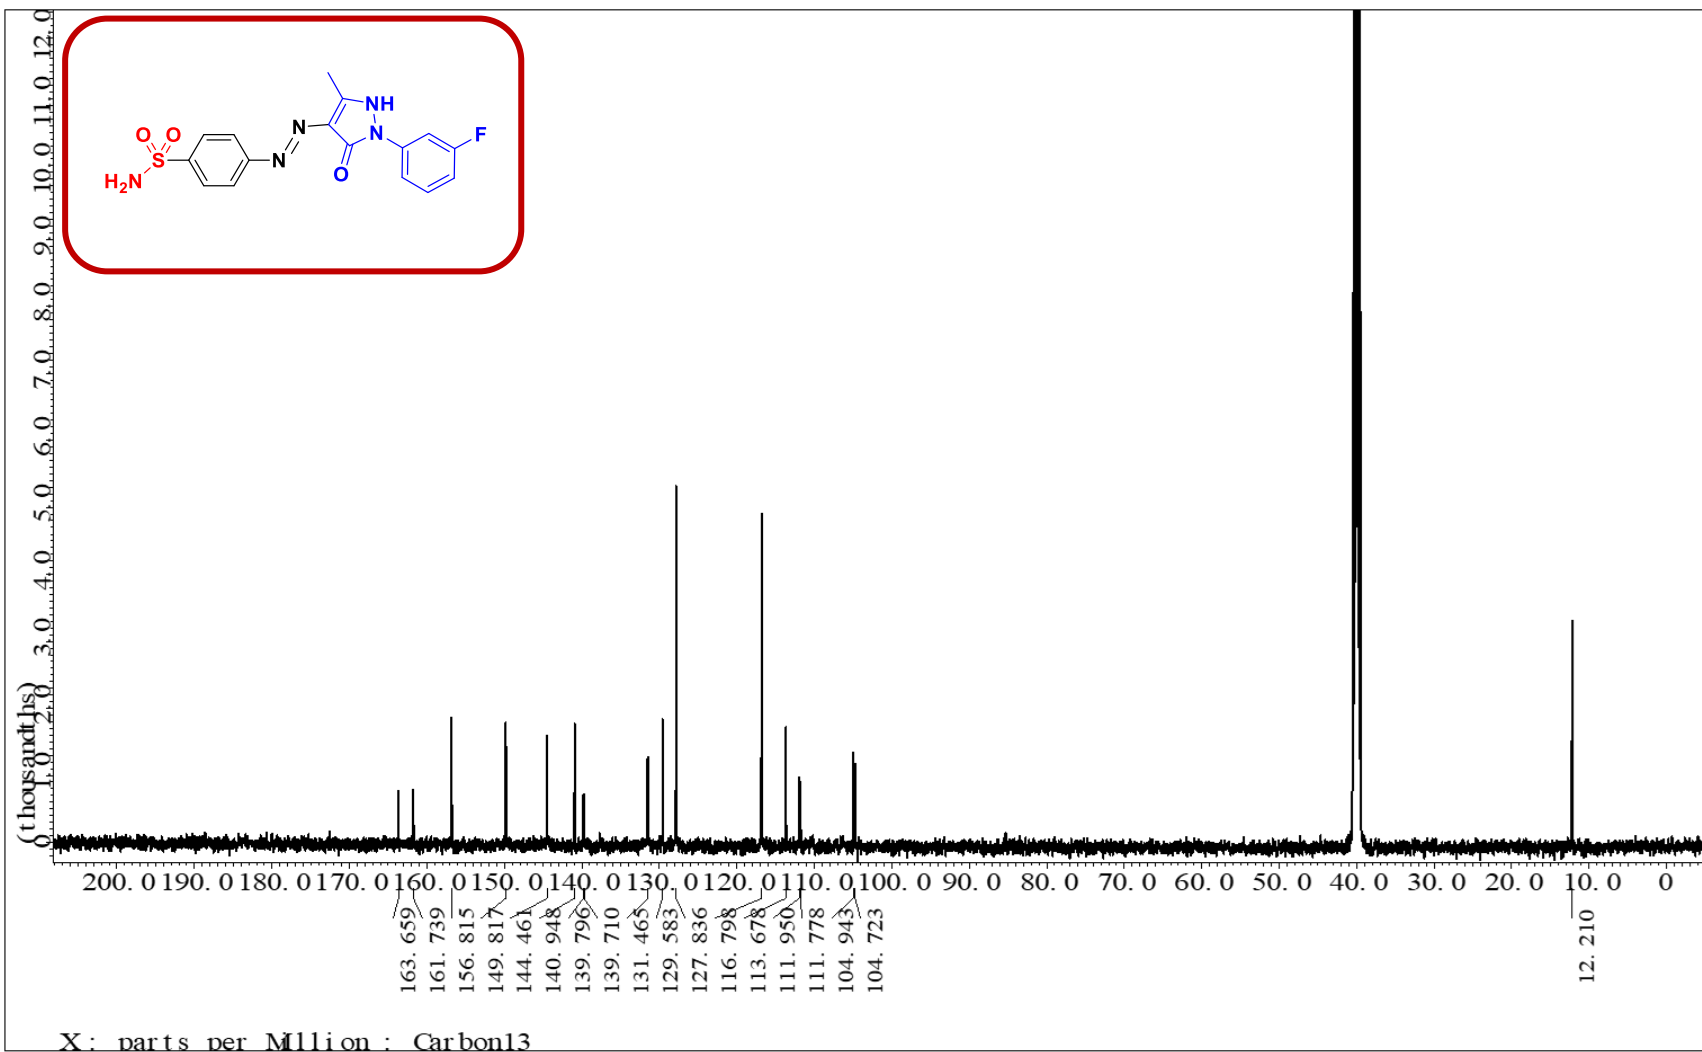

**Fig. 14** <sup>13</sup>C-NMR spectrum (125 MHz, DMSO-d<sub>6</sub>) of 3d.



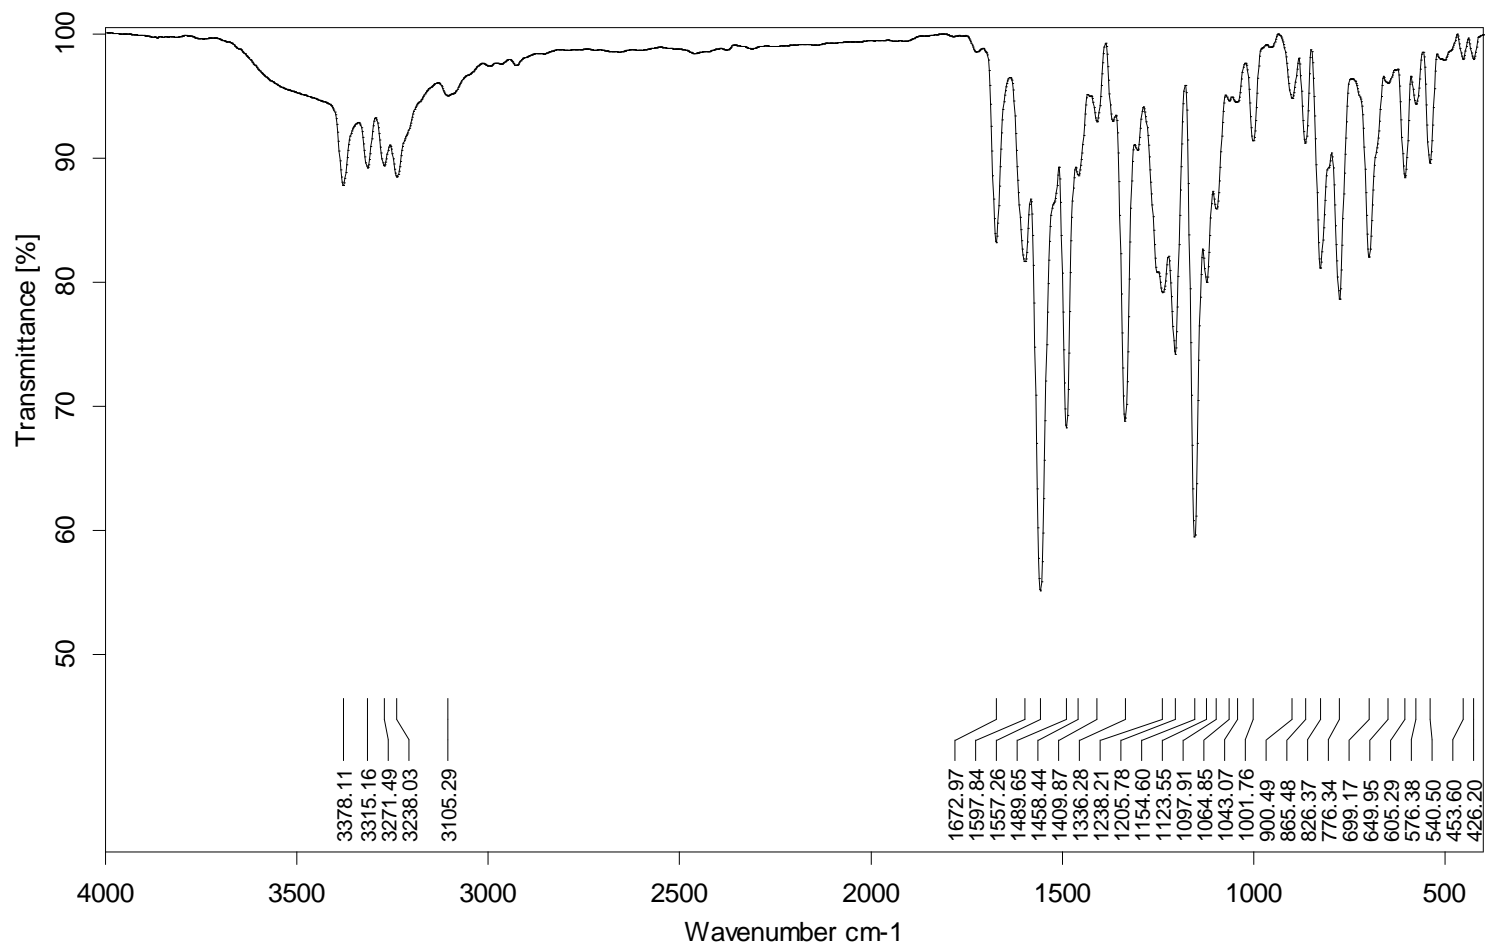

**Fig. 15** IR spectrum of **3d**.

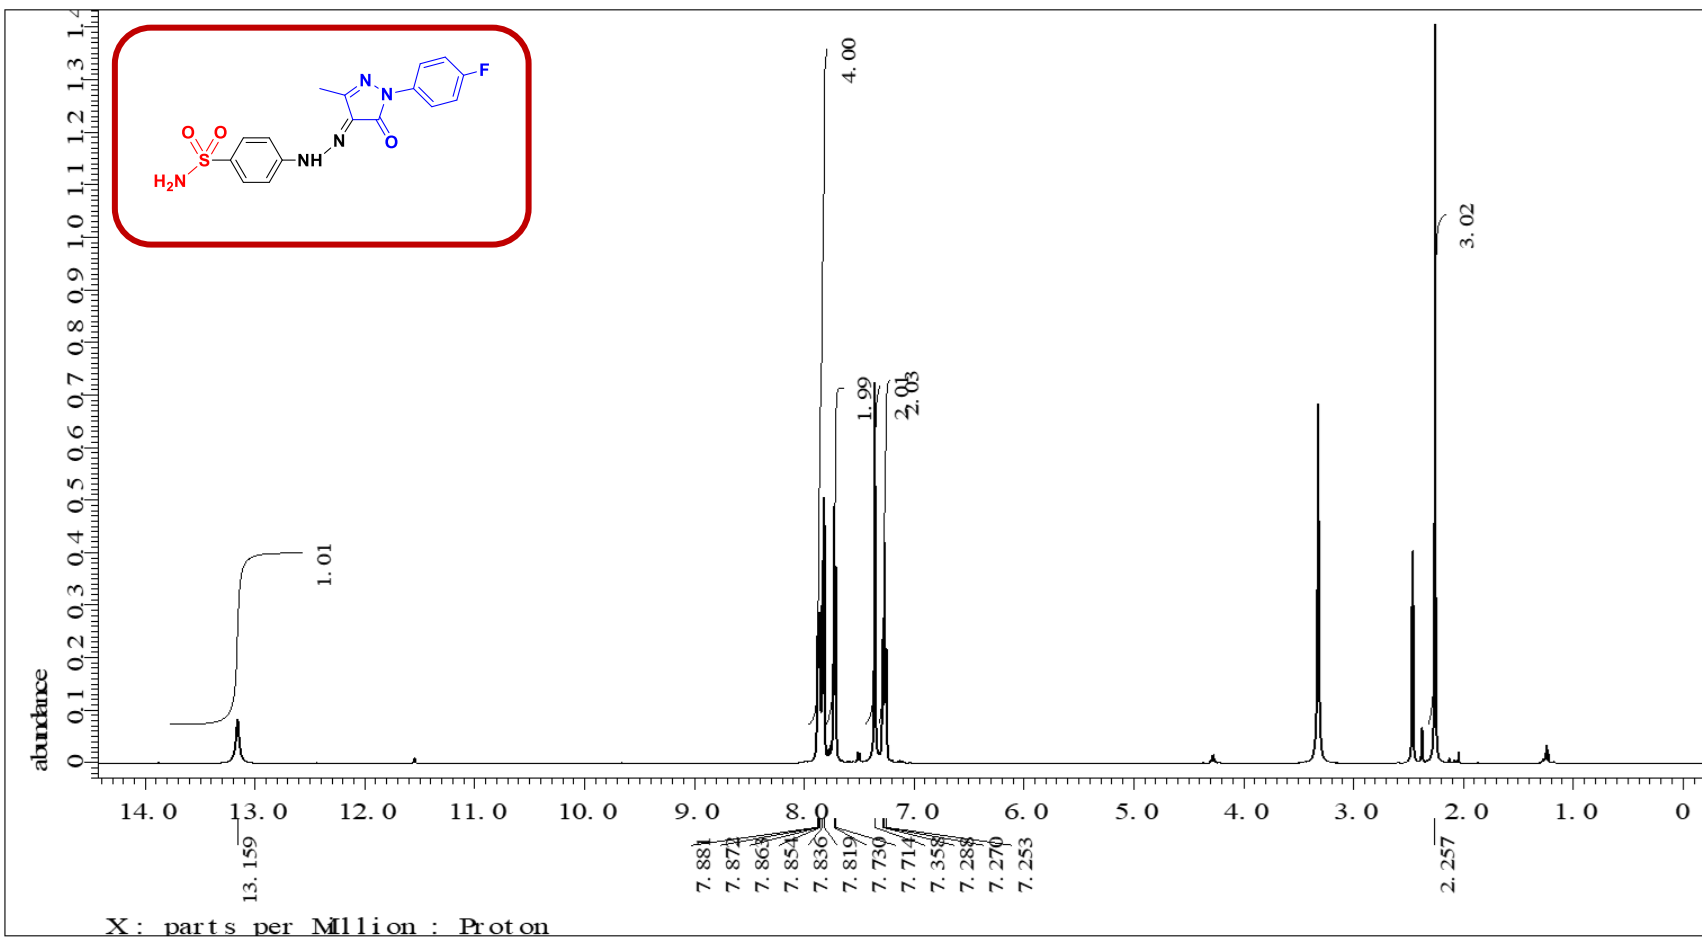

Fig. 16 <sup>1</sup>H-NMR spectrum (500 MHz, DMSO-d<sub>6</sub>) of **3e**.

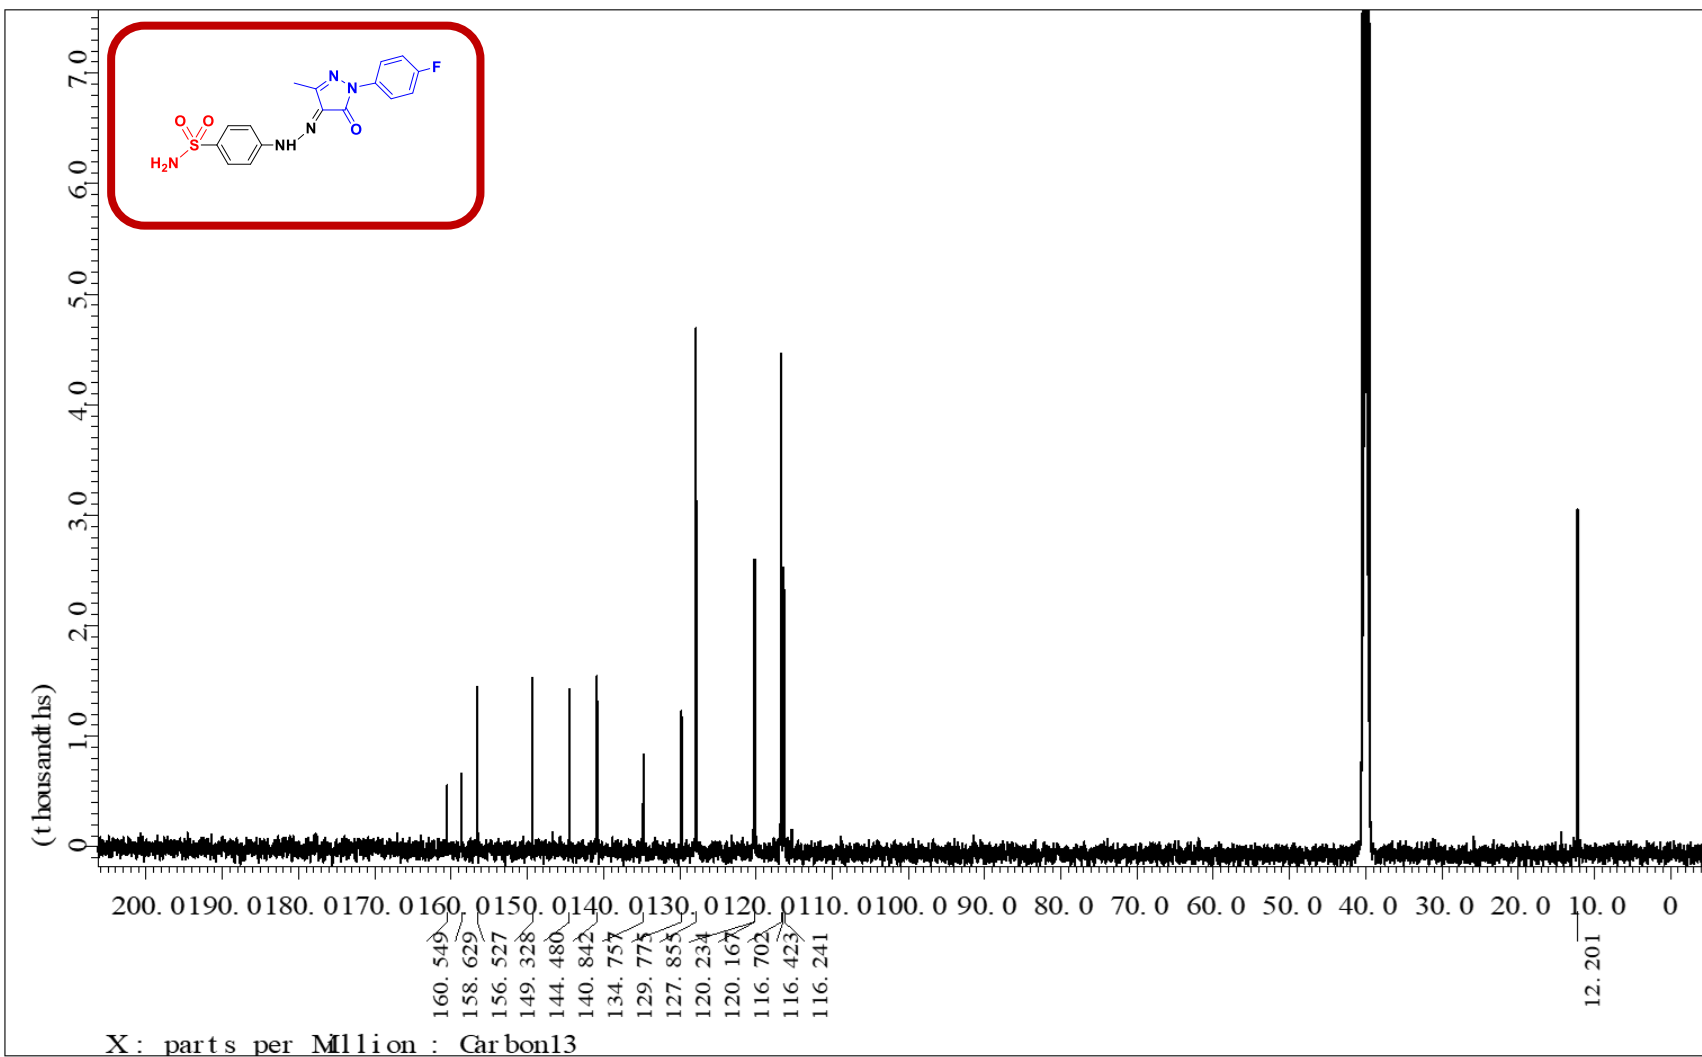

**Fig. 17**  $^{13}\text{C-NMR}$  spectrum (125 MHz, DMSO- $d_6$ ) of 3e.

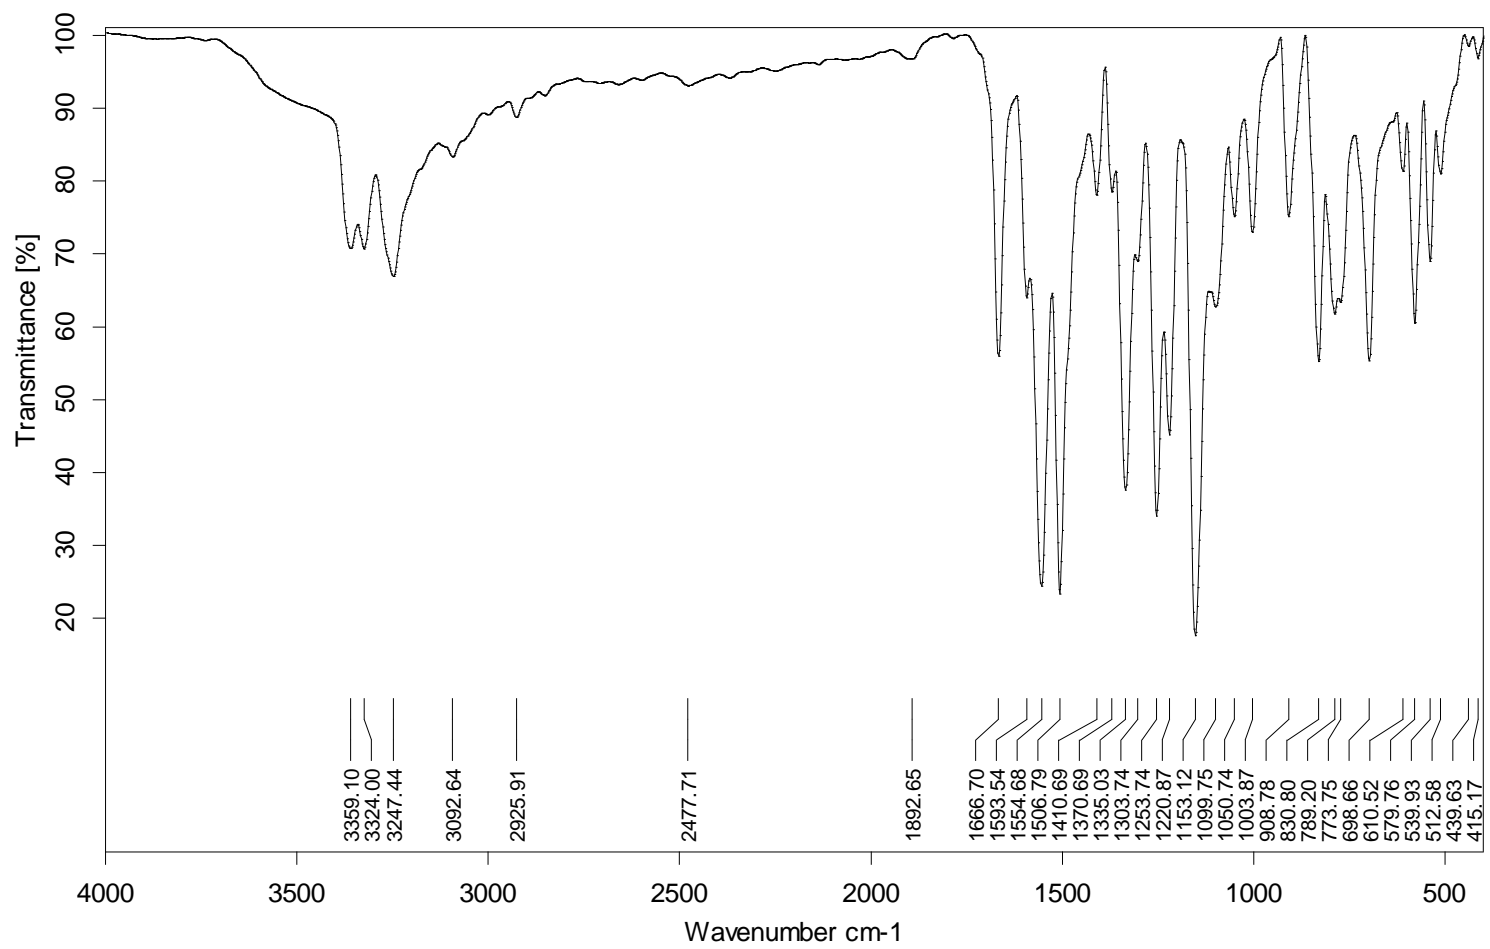

**Fig. 18** IR spectrum of **3e**.

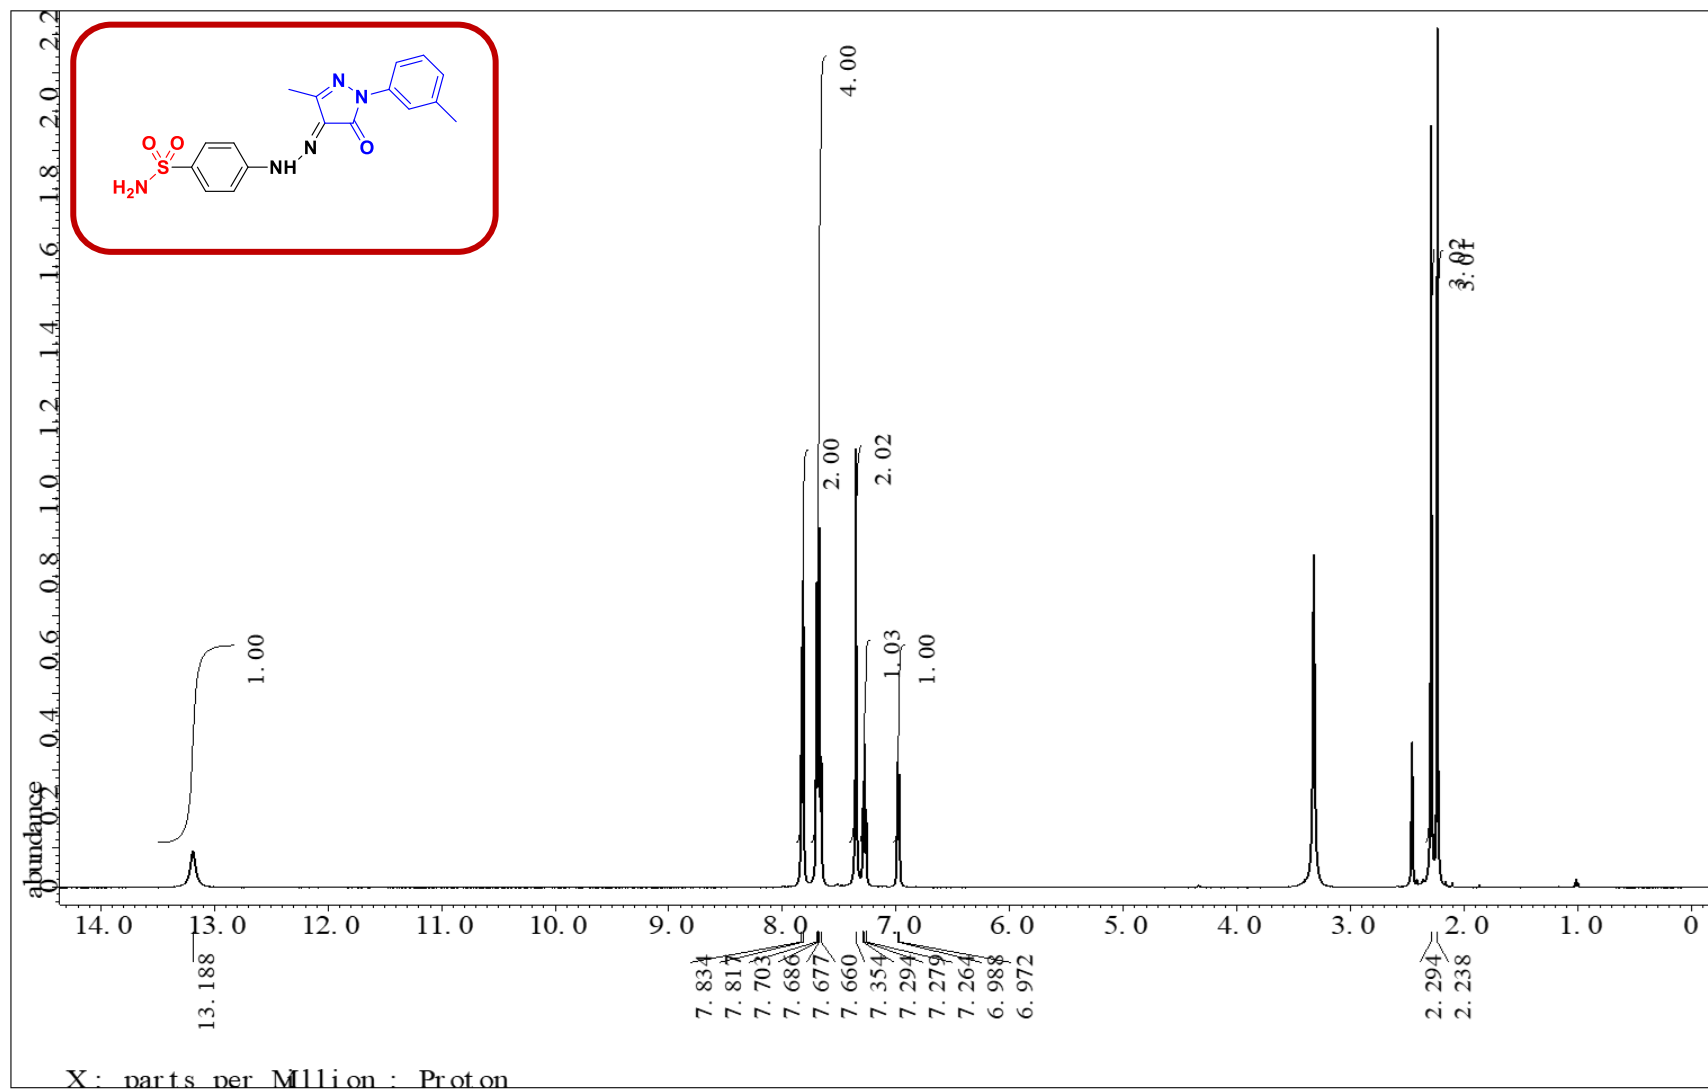

**Fig. 19**  $^1\text{H-NMR}$  spectrum (500 MHz,  $\text{DMSO-d}_6$ ) of **3f**.

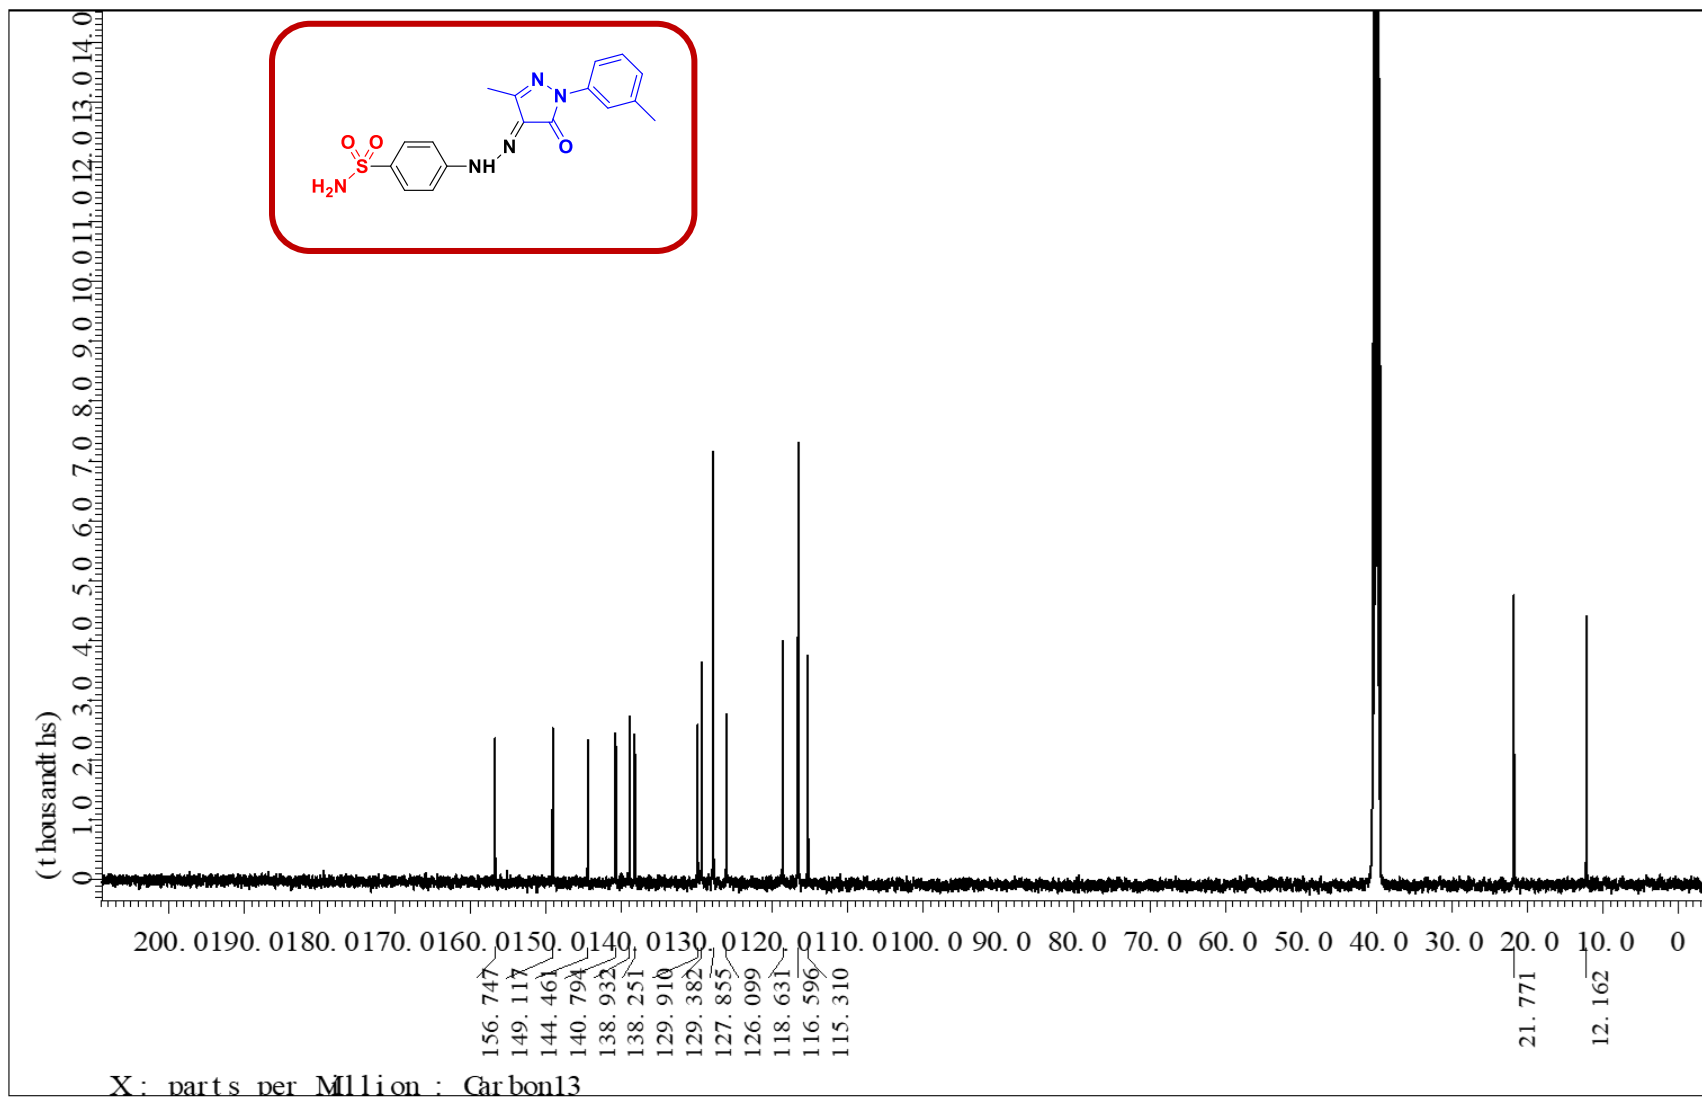

**Fig. 20**  $^{13}\text{C}$ -NMR spectrum (125 MHz, DMSO- $d_6$ ) of **3f**.

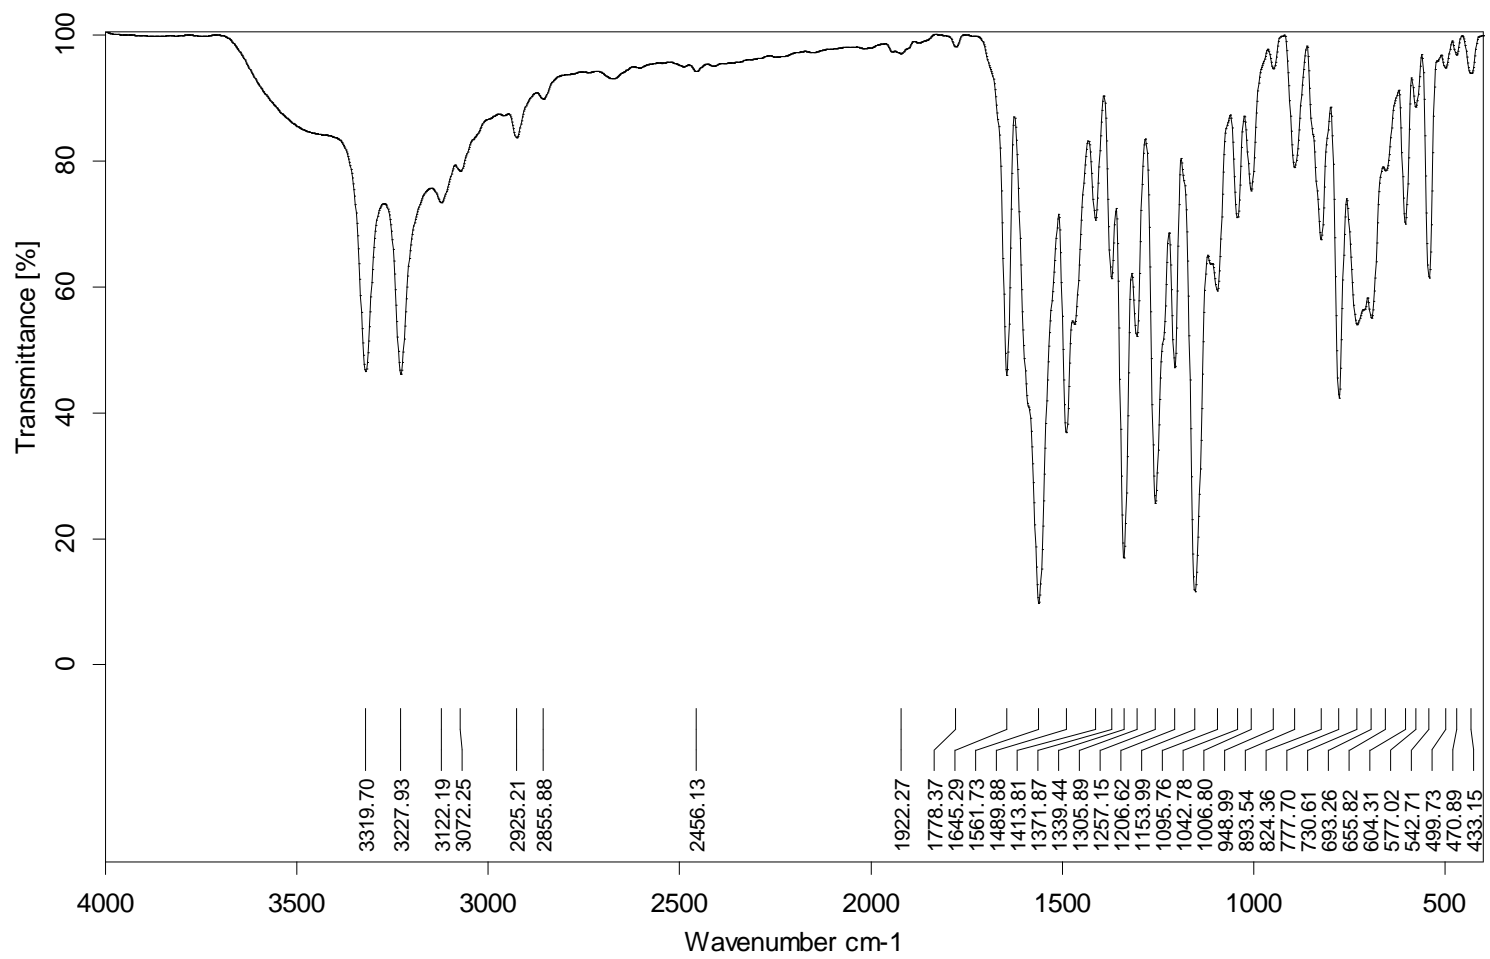

**Fig. 21** IR spectrum of **3f**.

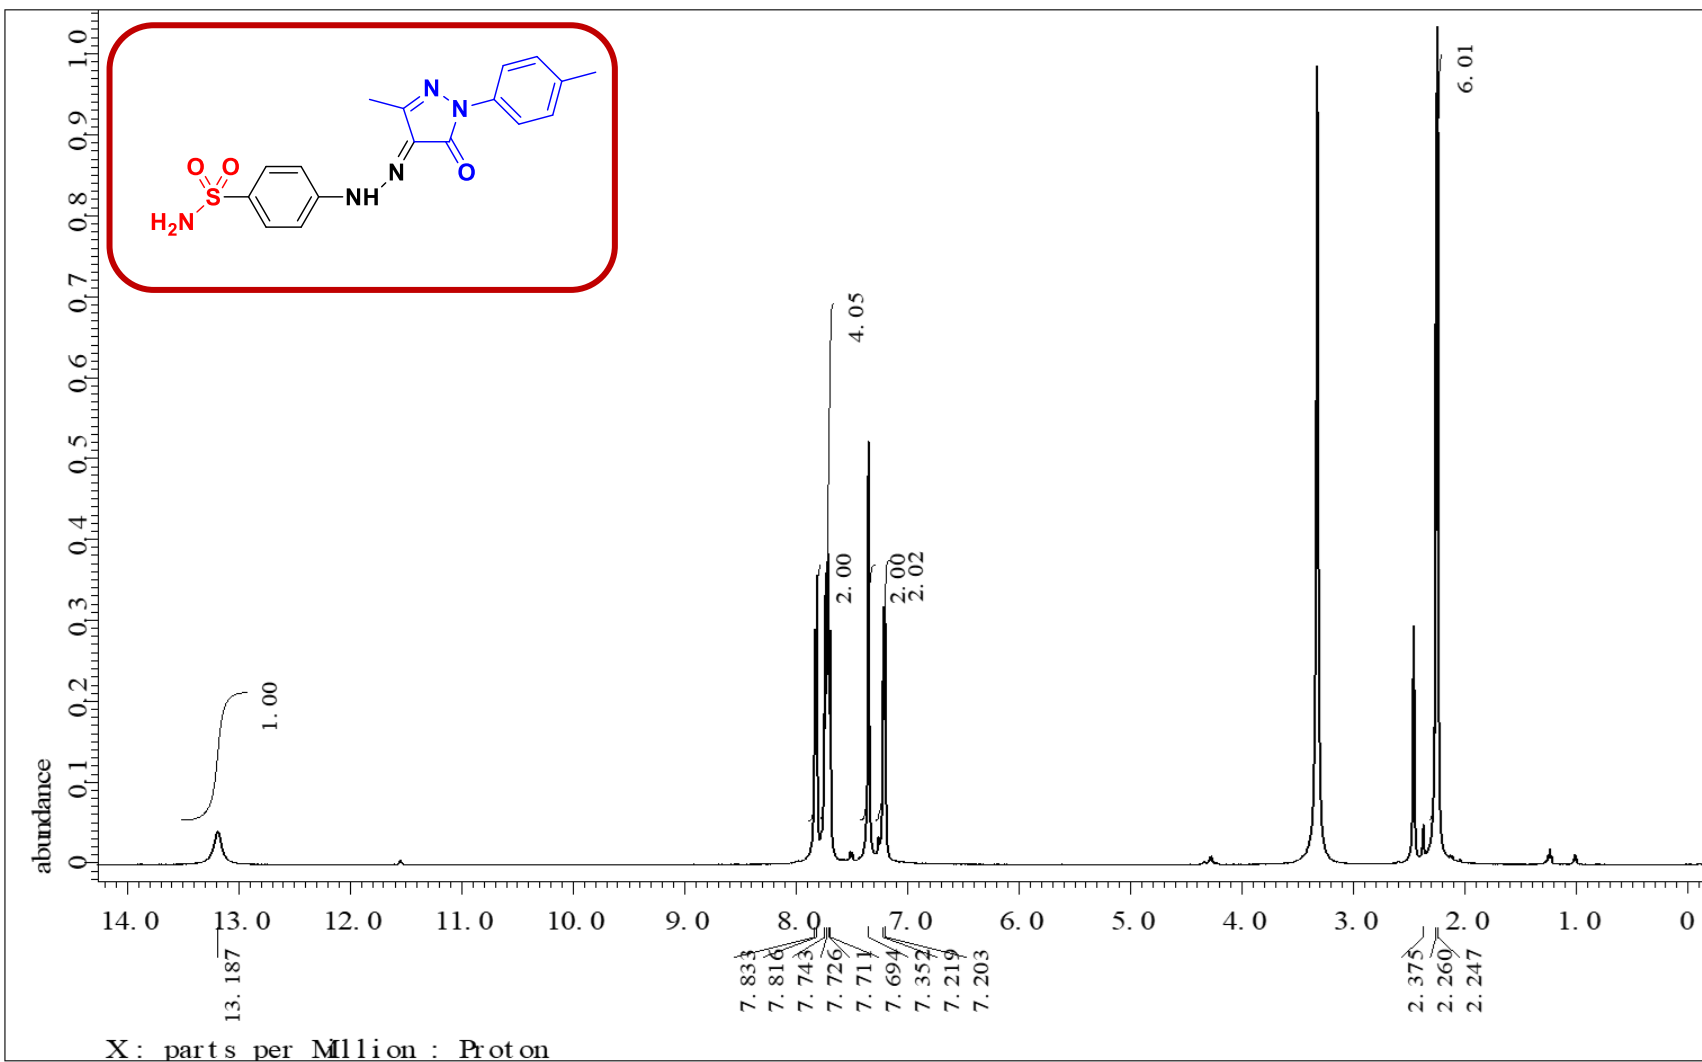

**Fig. 22** <sup>1</sup>H-NMR spectrum (500 MHz, DMSO-d<sub>6</sub>) of **3g**.



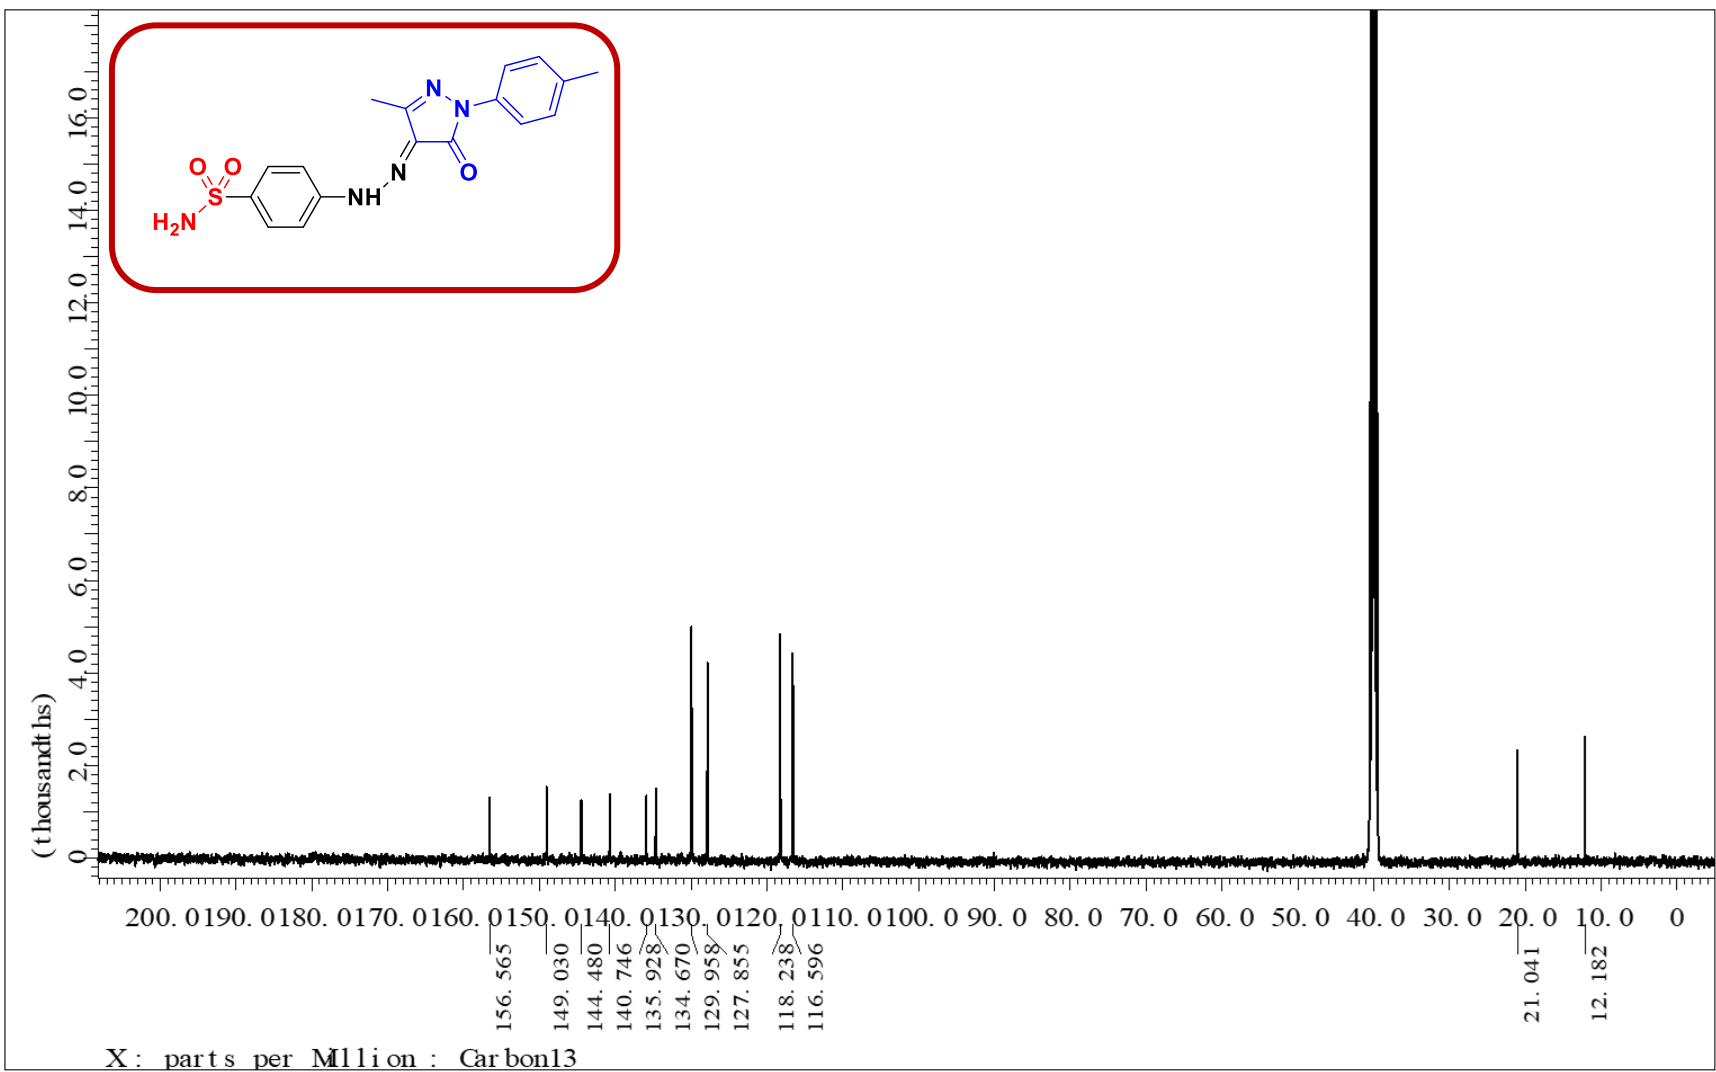

**Fig. 23**  $^{13}\text{C-NMR}$  spectrum (125 MHz, DMSO- $d_6$ ) of 3g.

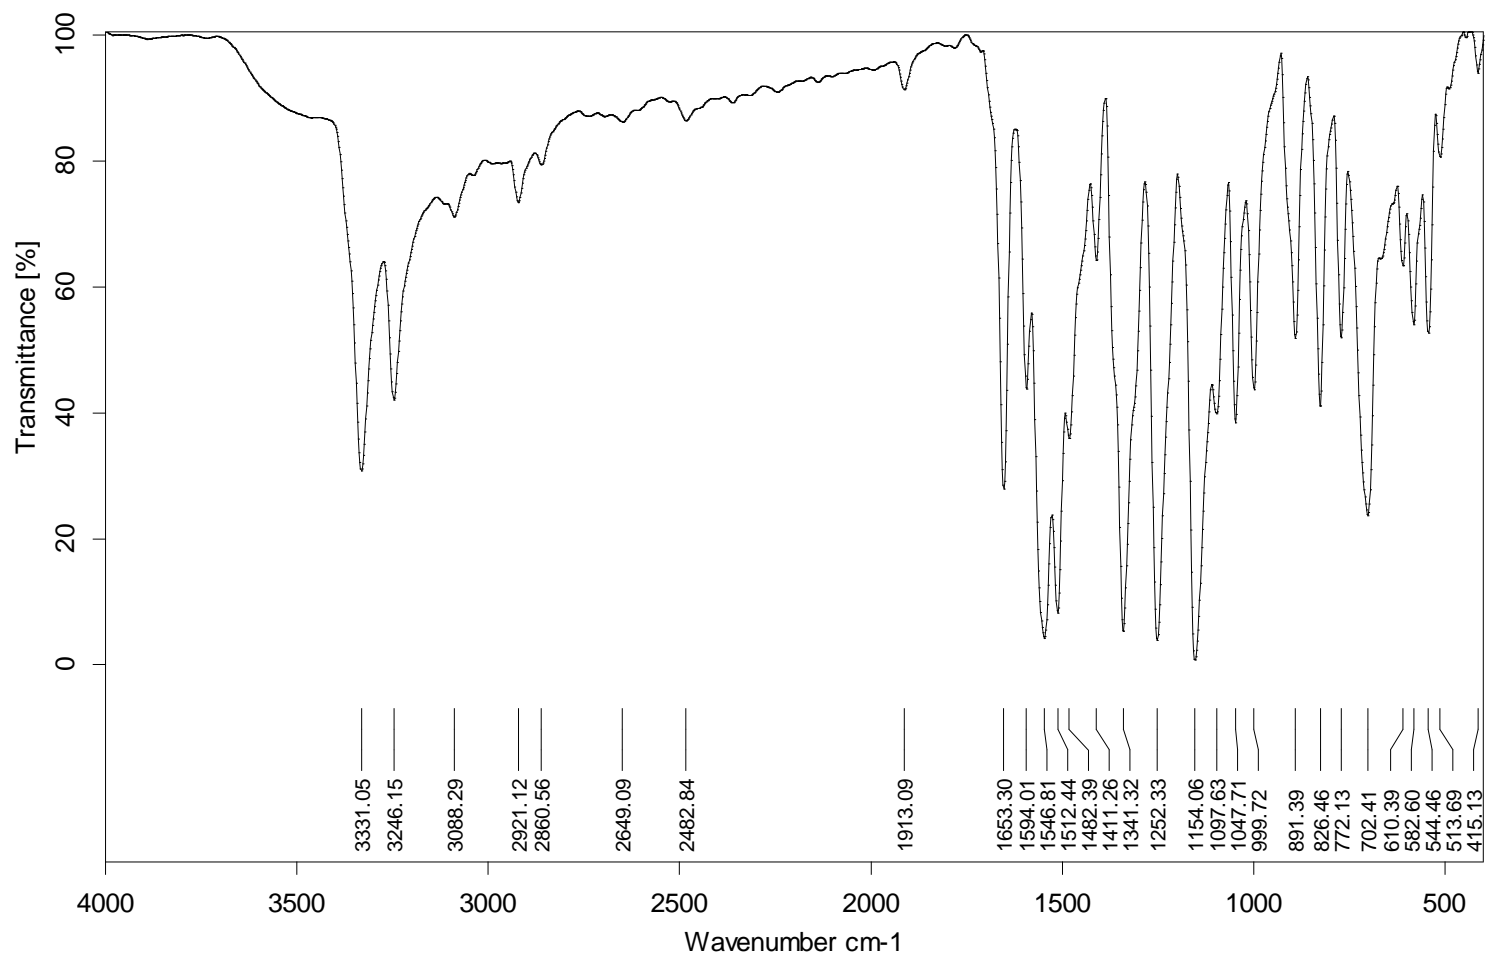

**Fig. 24** IR spectrum of **3g**.

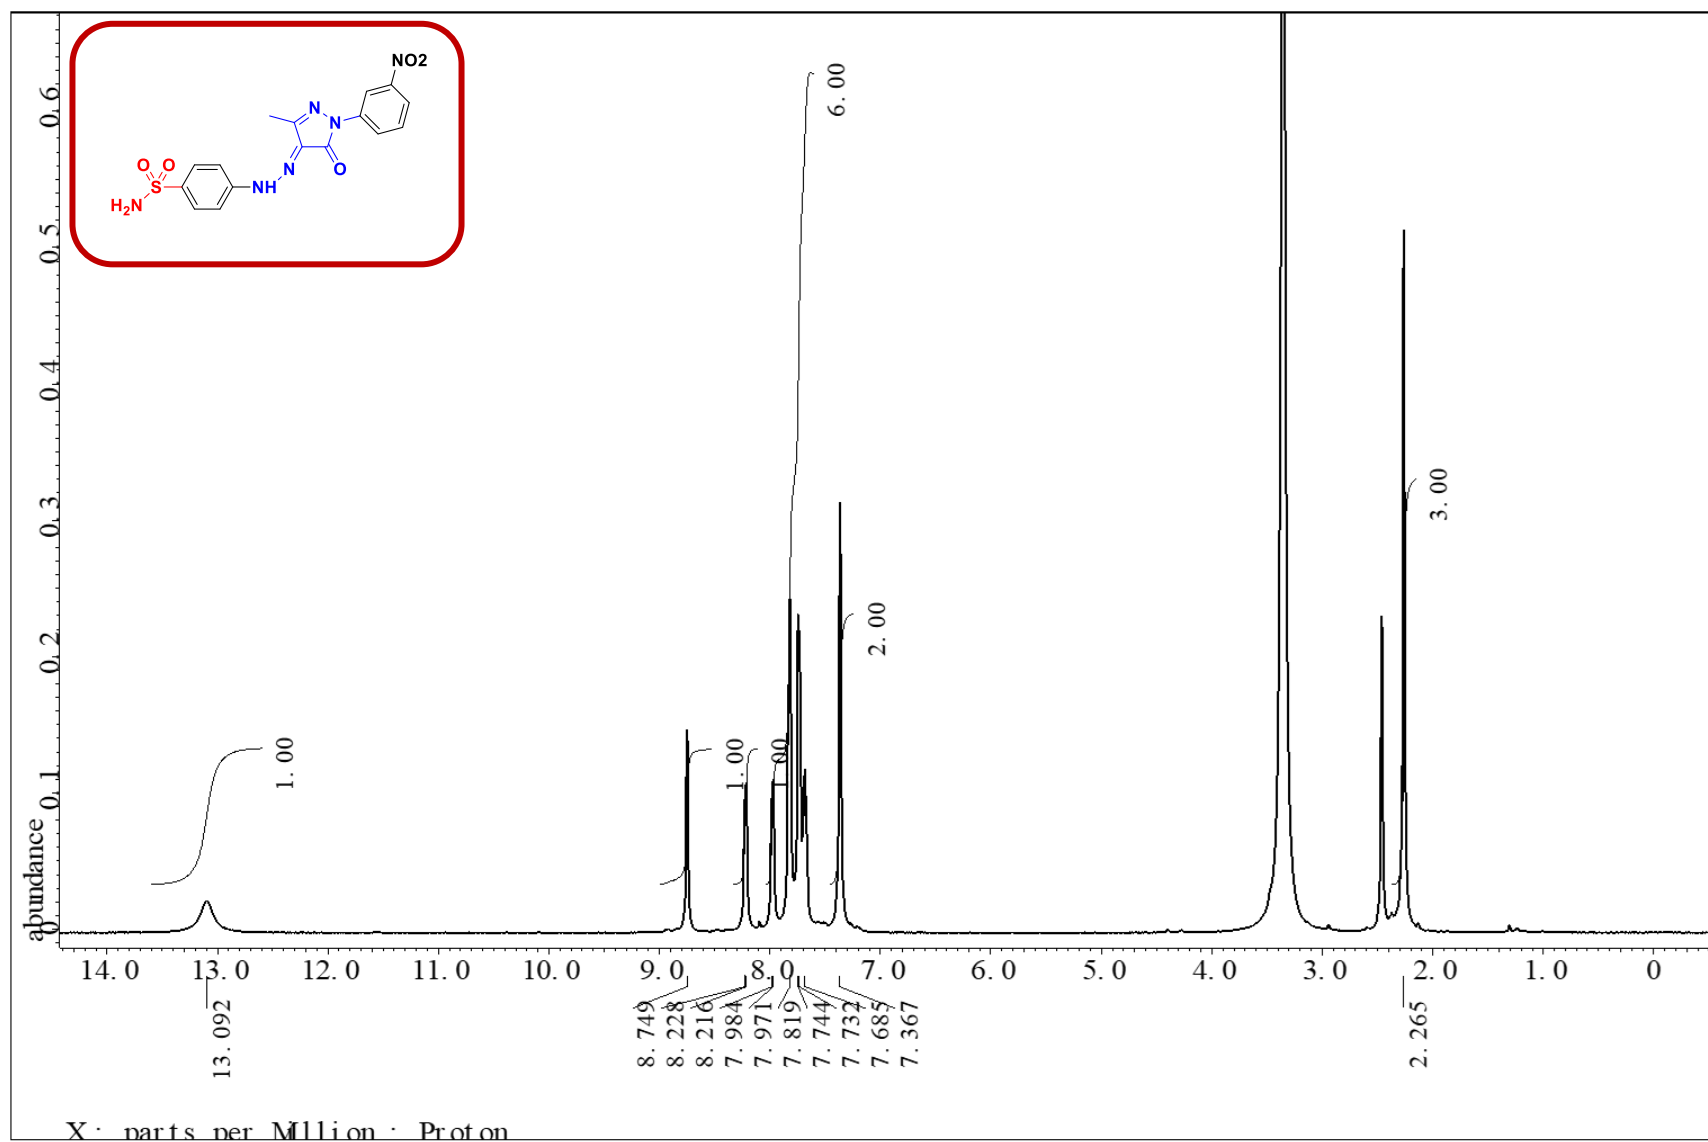

**Fig. 25** <sup>1</sup>H-NMR spectrum (500 MHz, DMSO-d<sub>6</sub>) of **3h**.

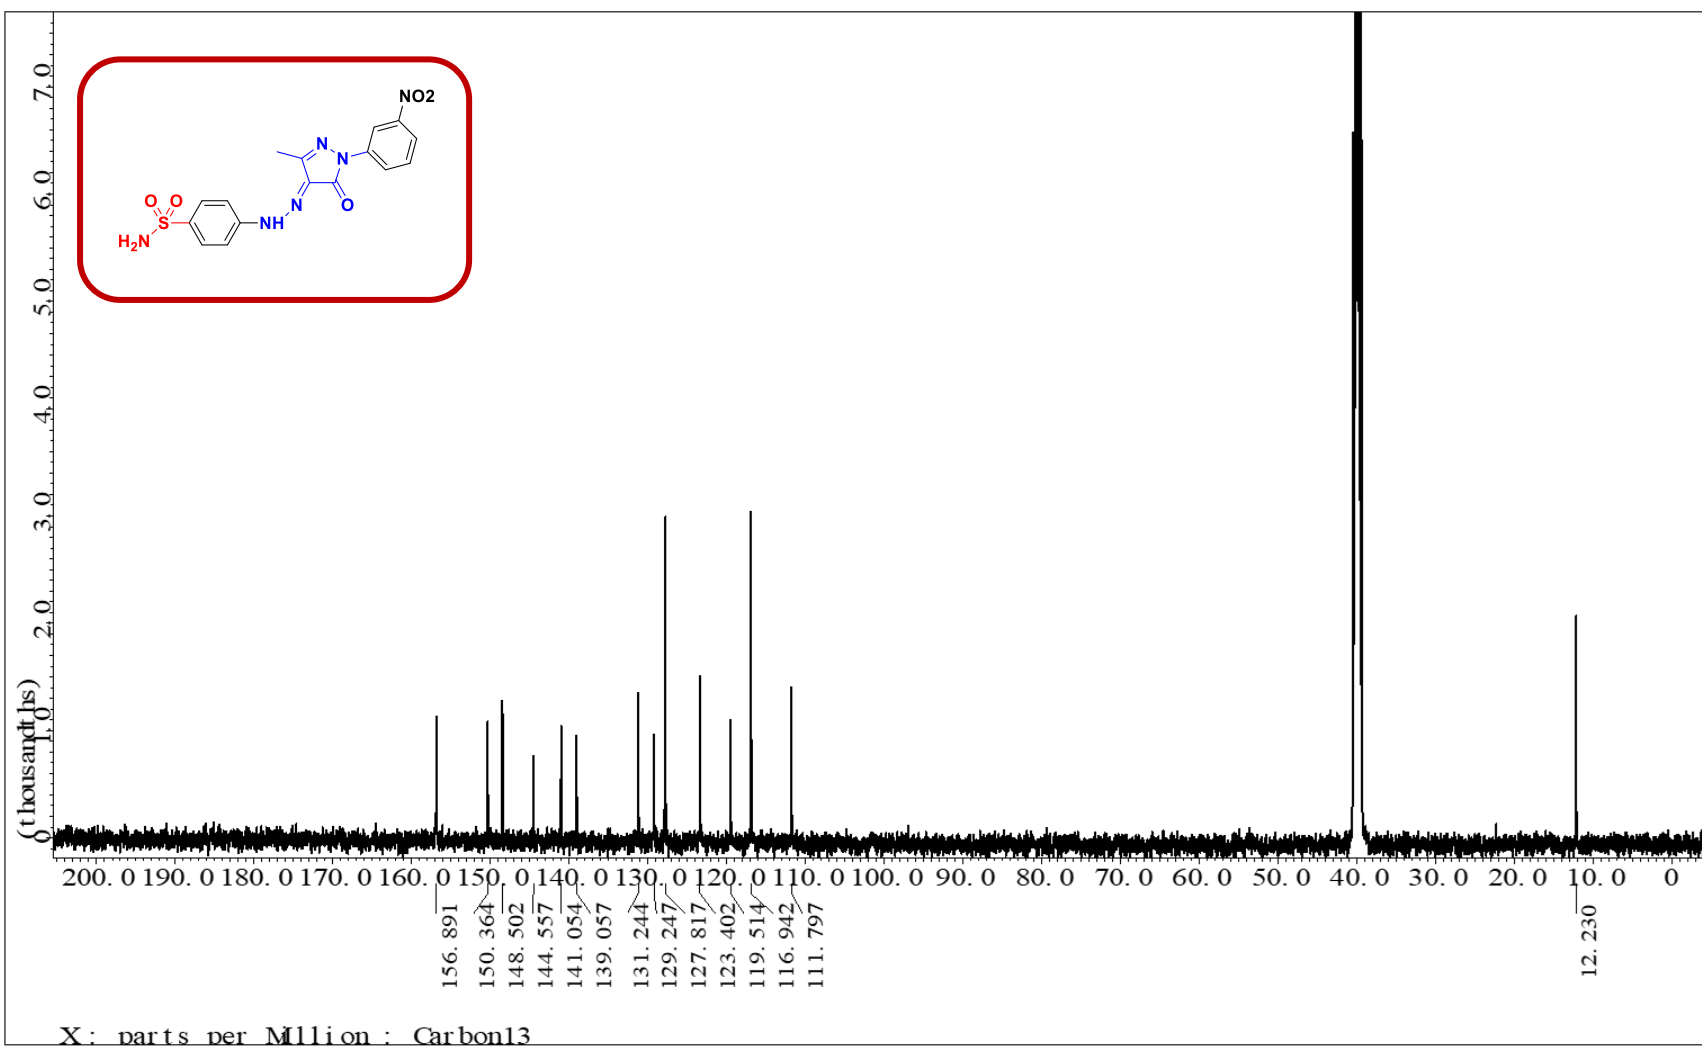

**Fig. 26**  $^{13}\text{C}$ -NMR spectrum (125 MHz, DMSO- $d_6$ ) of 3h.

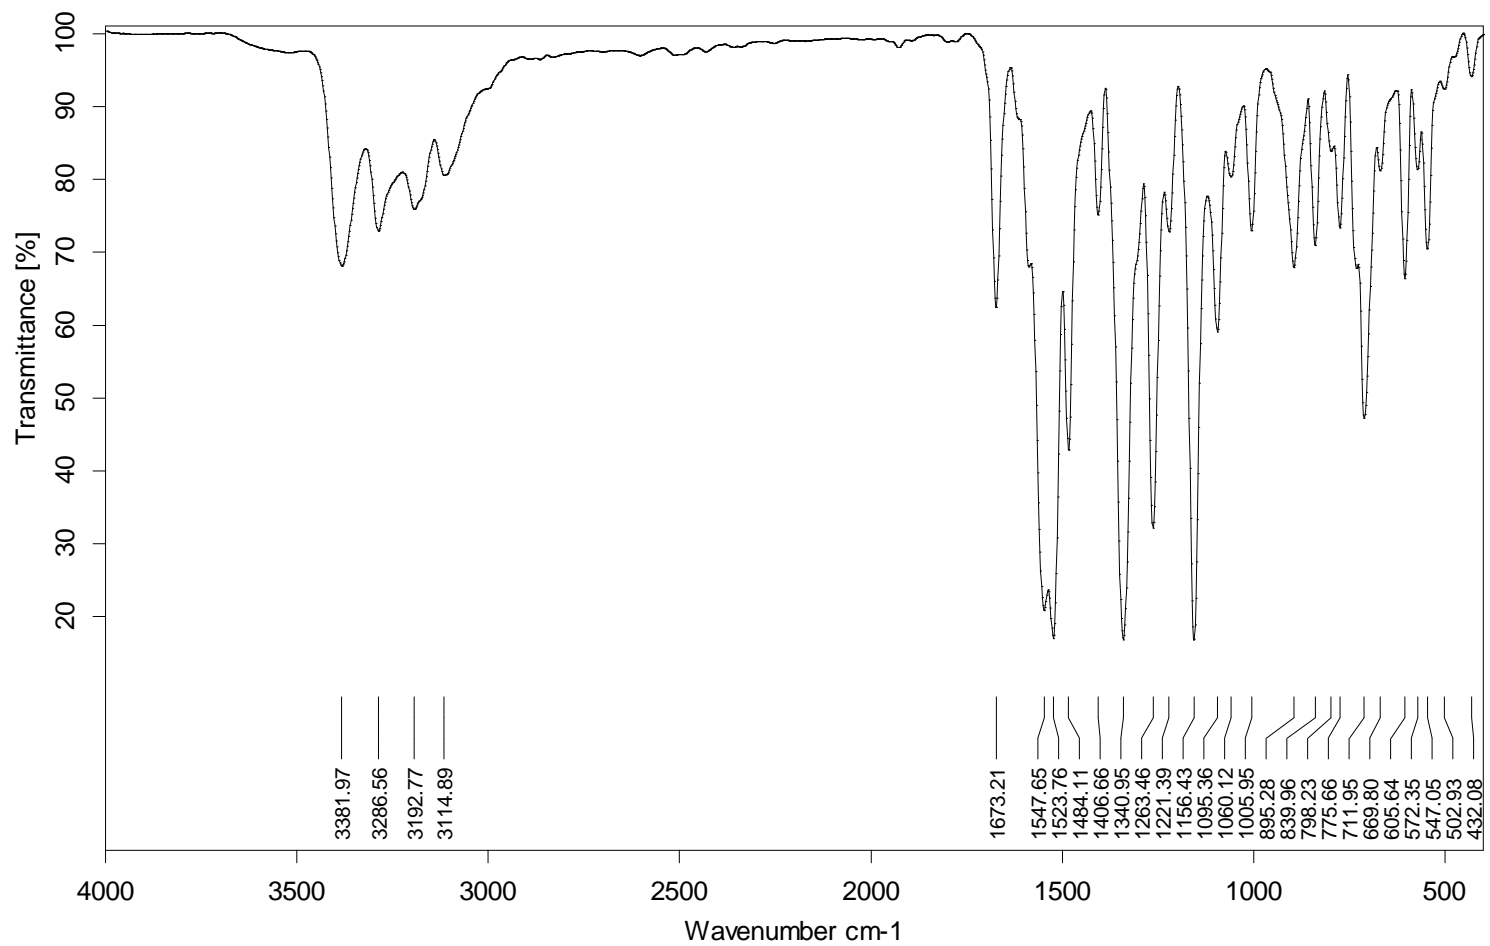

**Fig. 27** IR spectrum of **3h**.

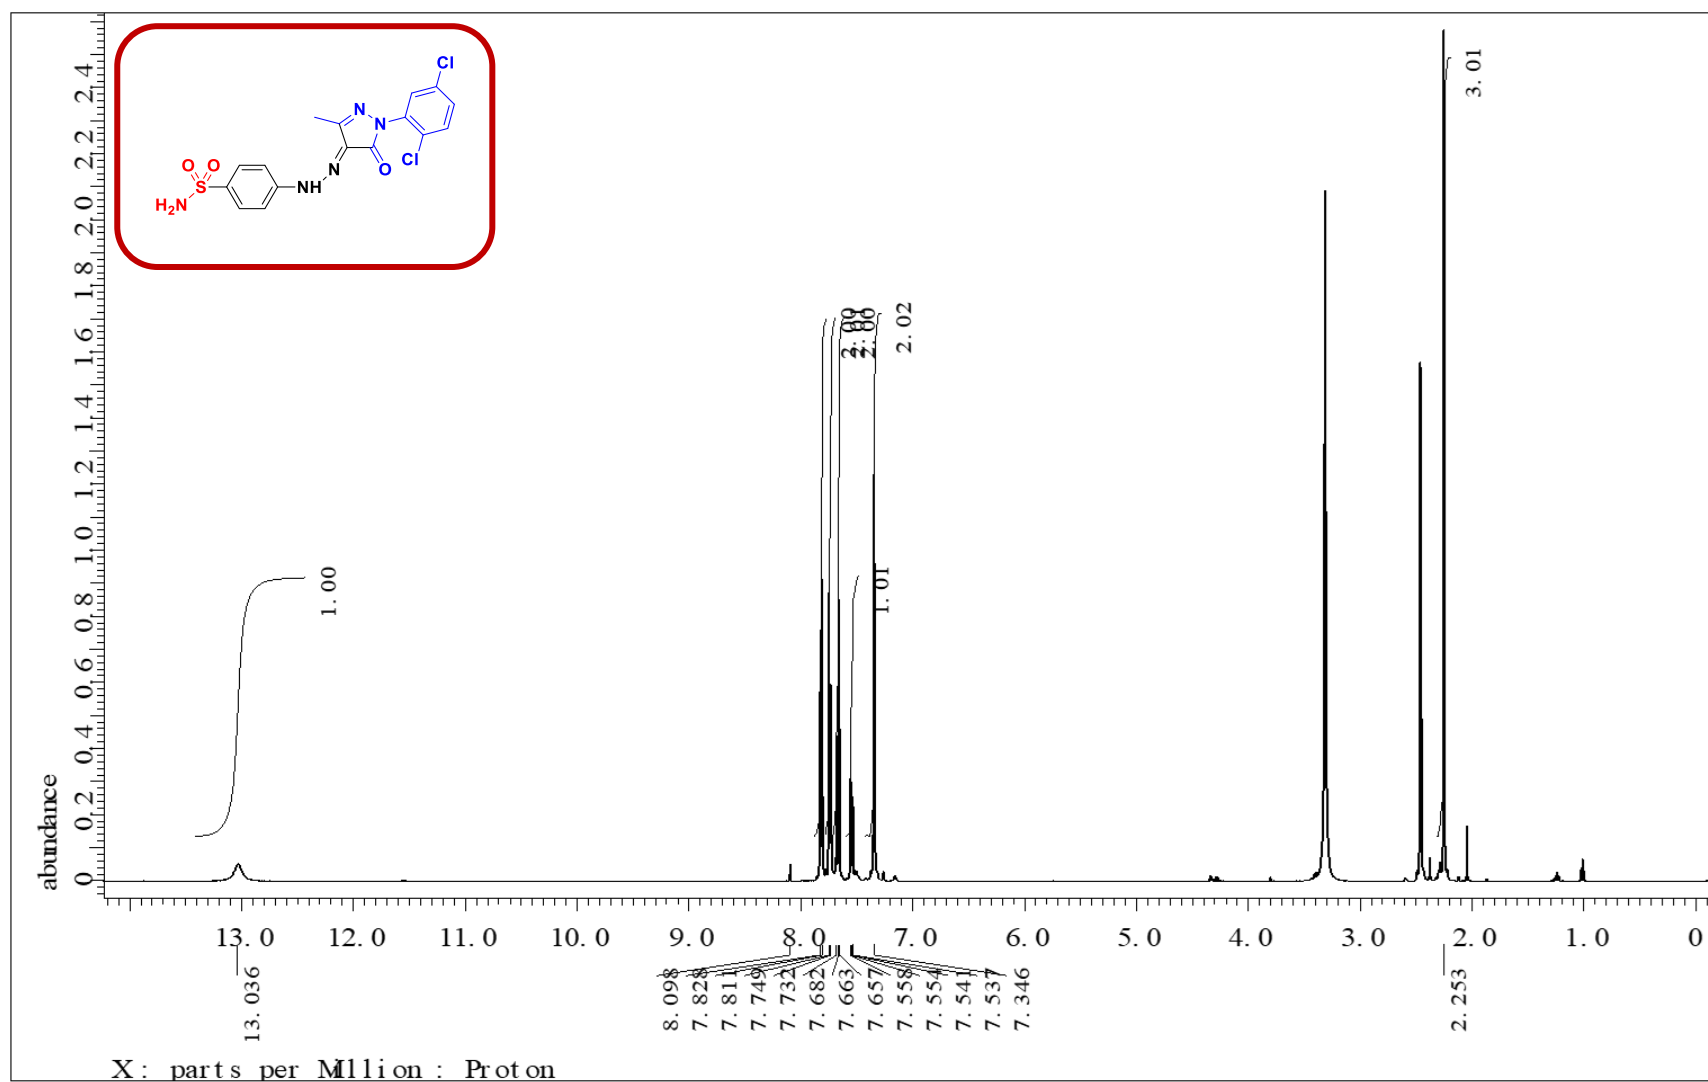

**Fig. 28** <sup>1</sup>H-NMR spectrum (500 MHz, DMSO-d<sub>6</sub>) of **3i**.

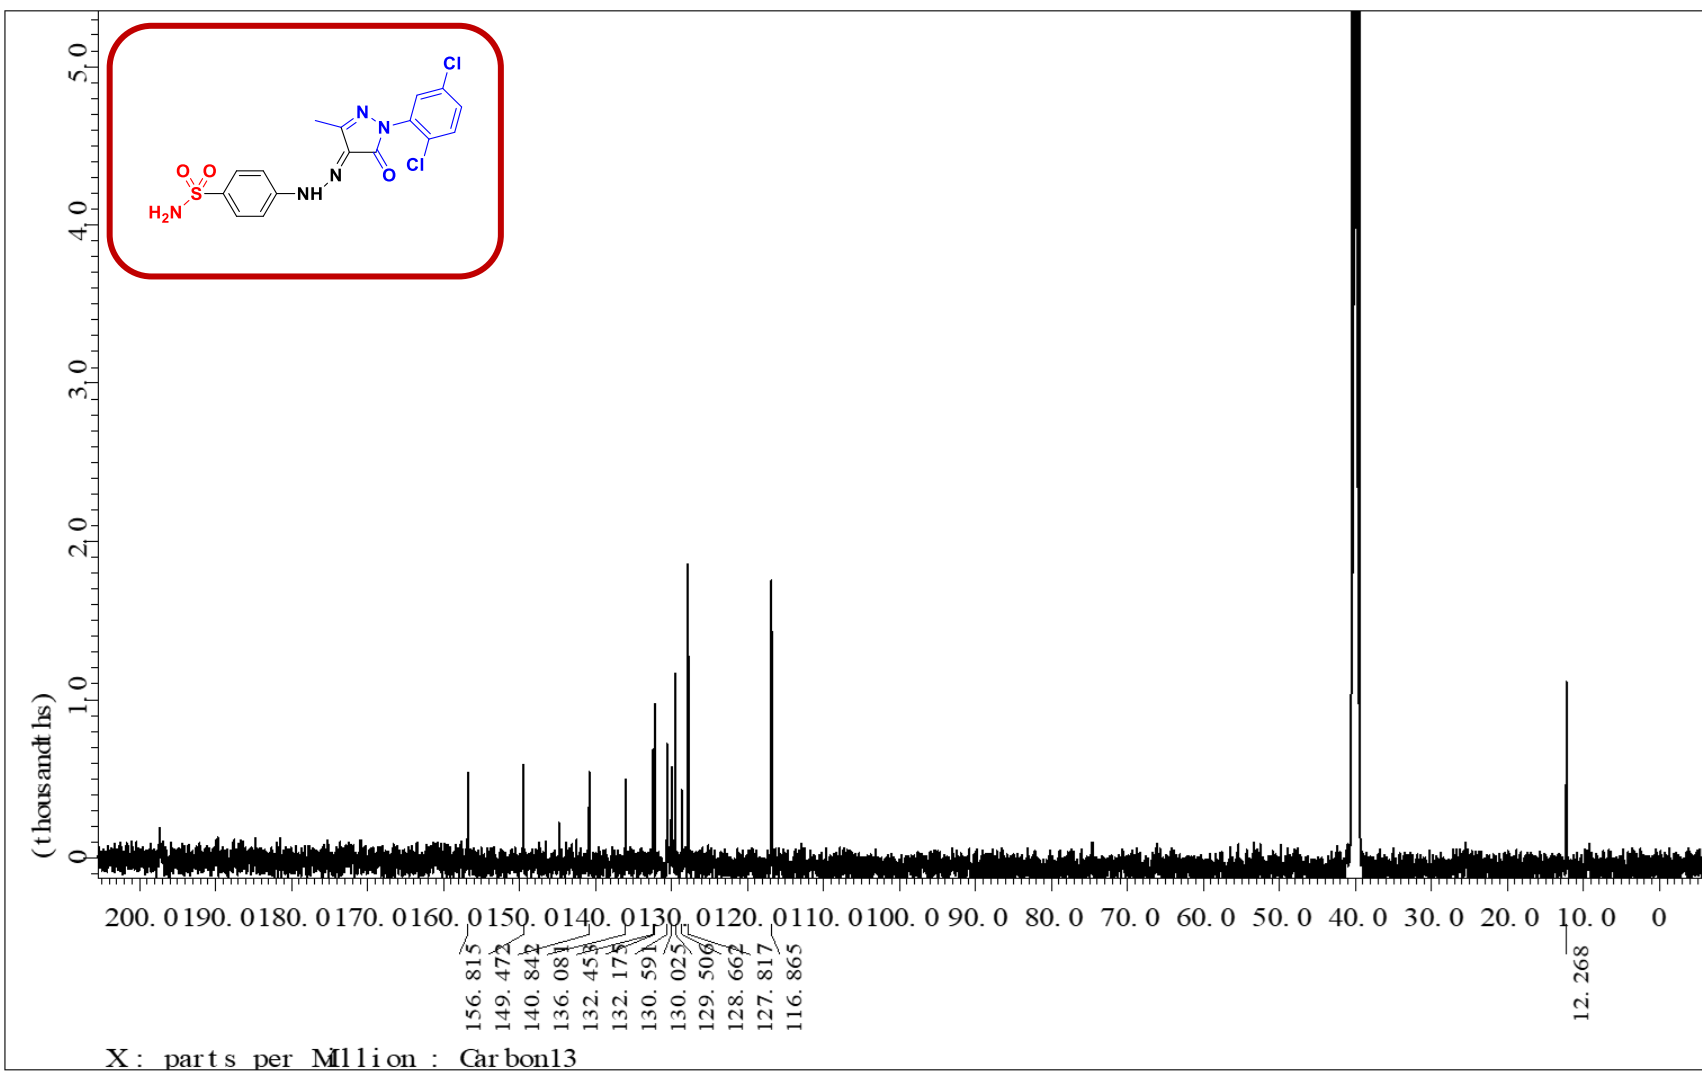

**Fig. 29**  $^{13}\text{C}$ -NMR spectrum (125 MHz, DMSO- $d_6$ ) of **3i**.

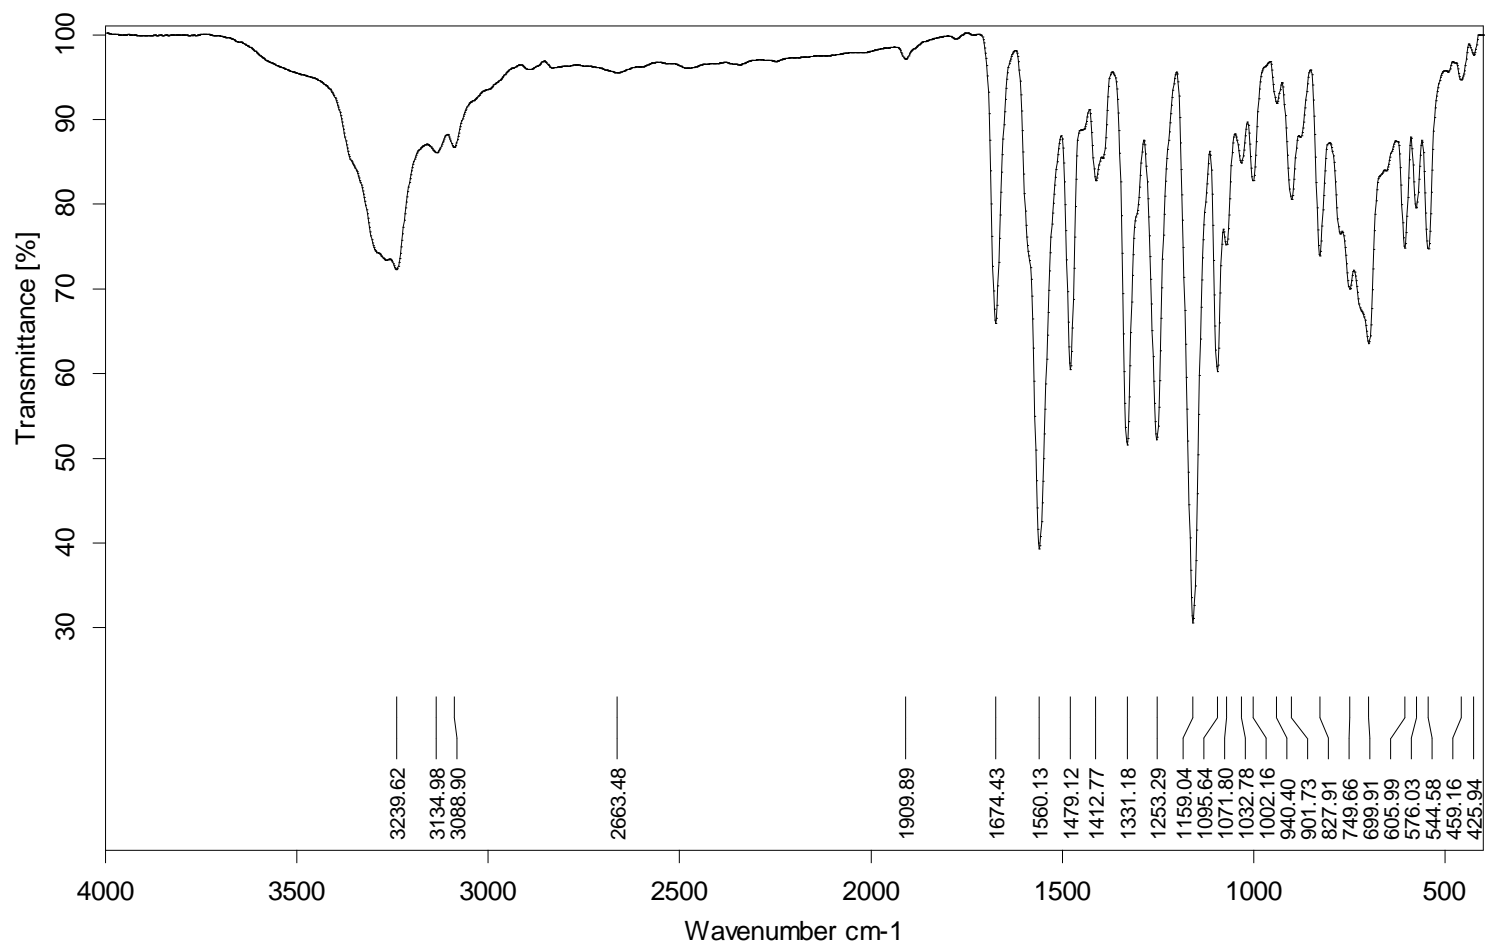

**Fig. 30** IR spectrum of **3i**.



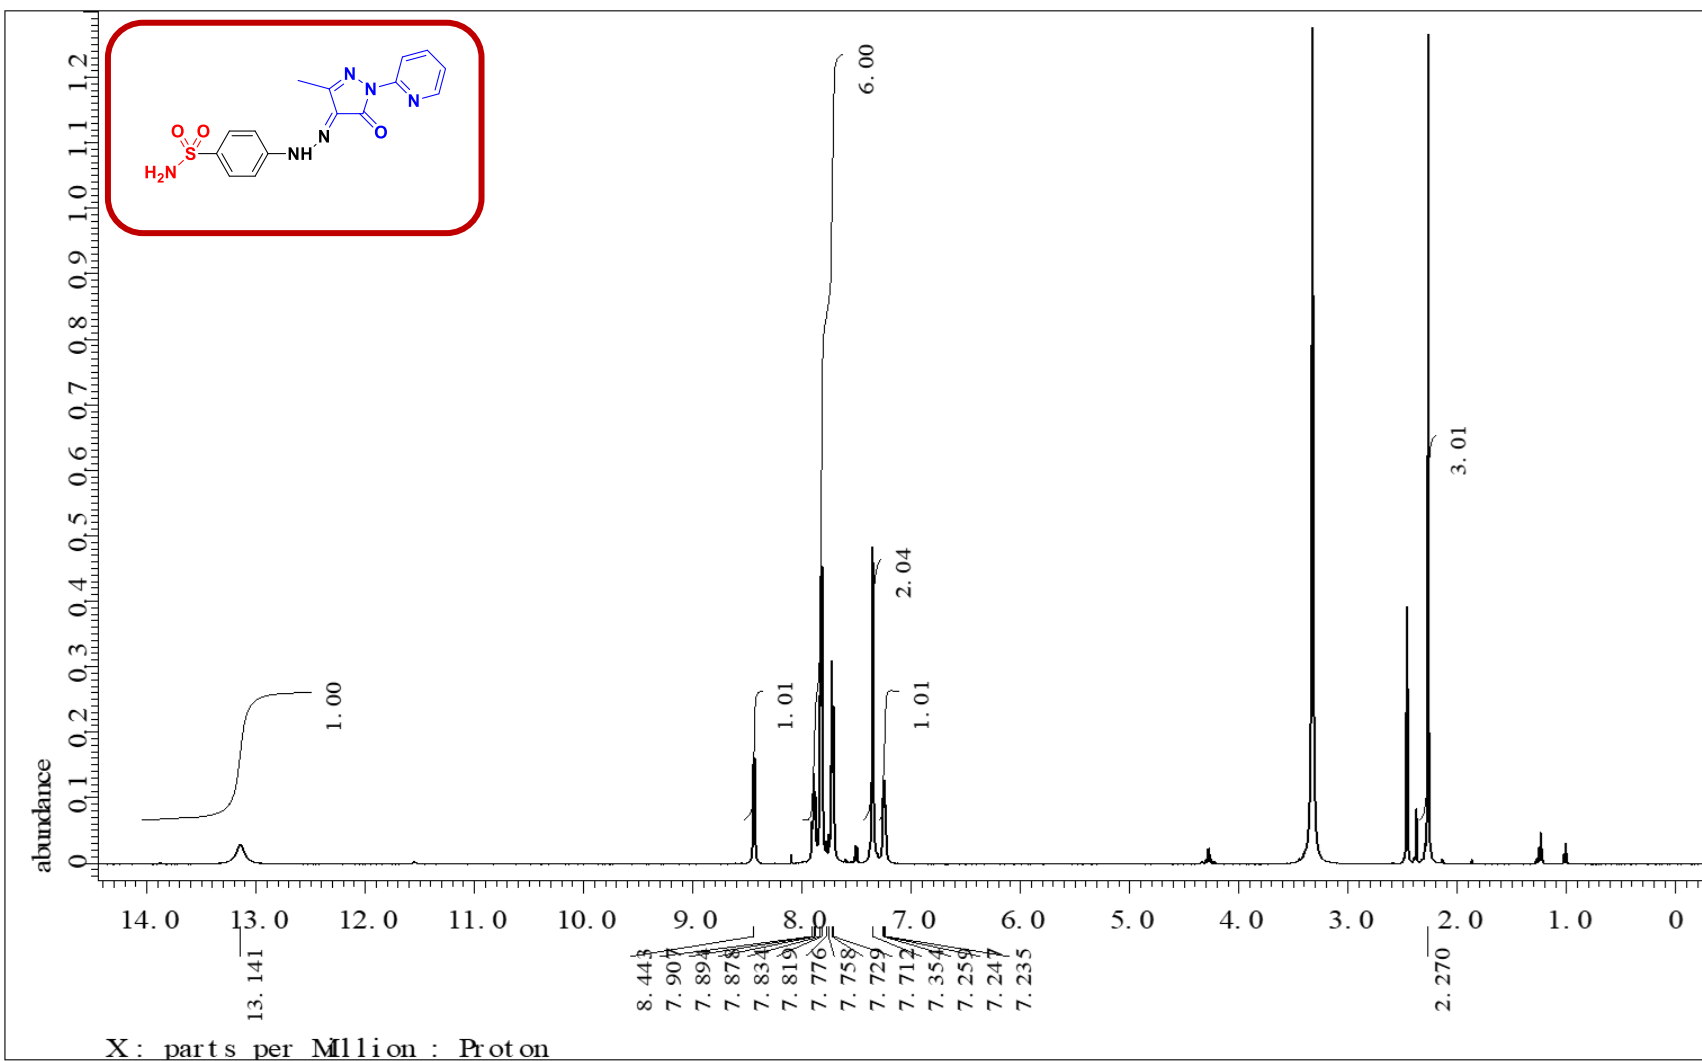

**Fig. 31** <sup>1</sup>H-NMR spectrum (500 MHz, DMSO-d<sub>6</sub>) of **3j**.

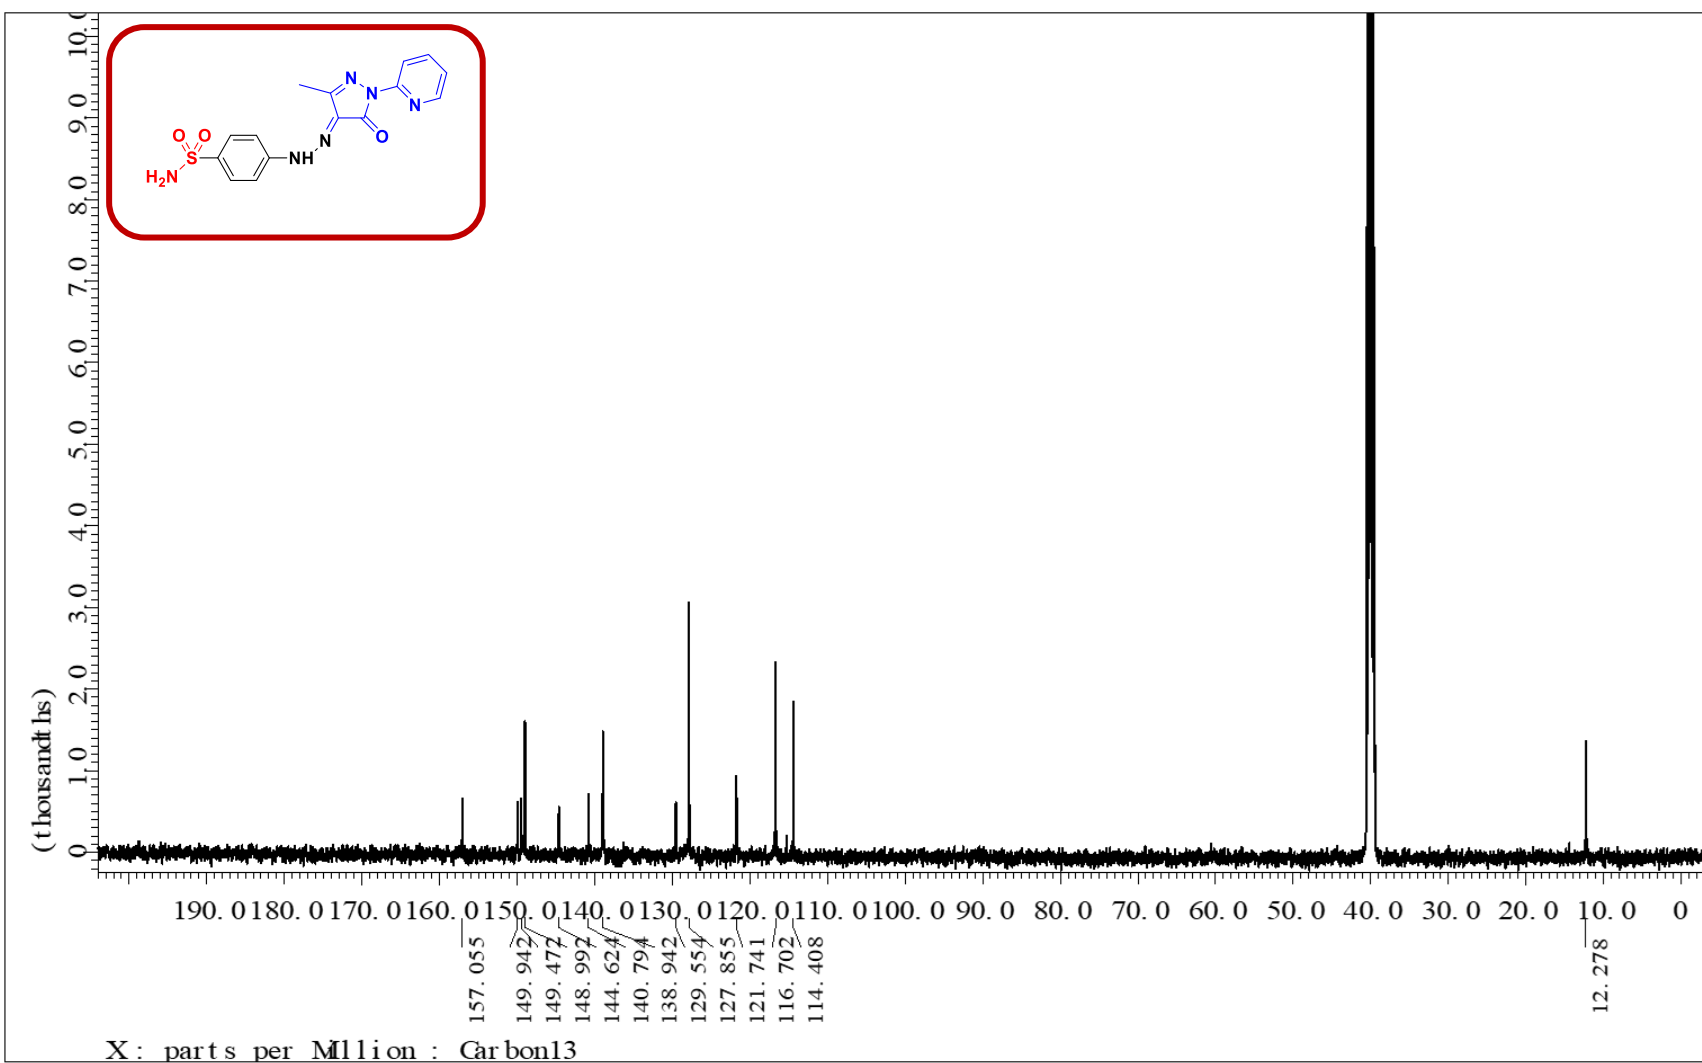

**Fig. 32**  $^{13}\text{C}$ -NMR spectrum (125 MHz, DMSO- $d_6$ ) of 3j.

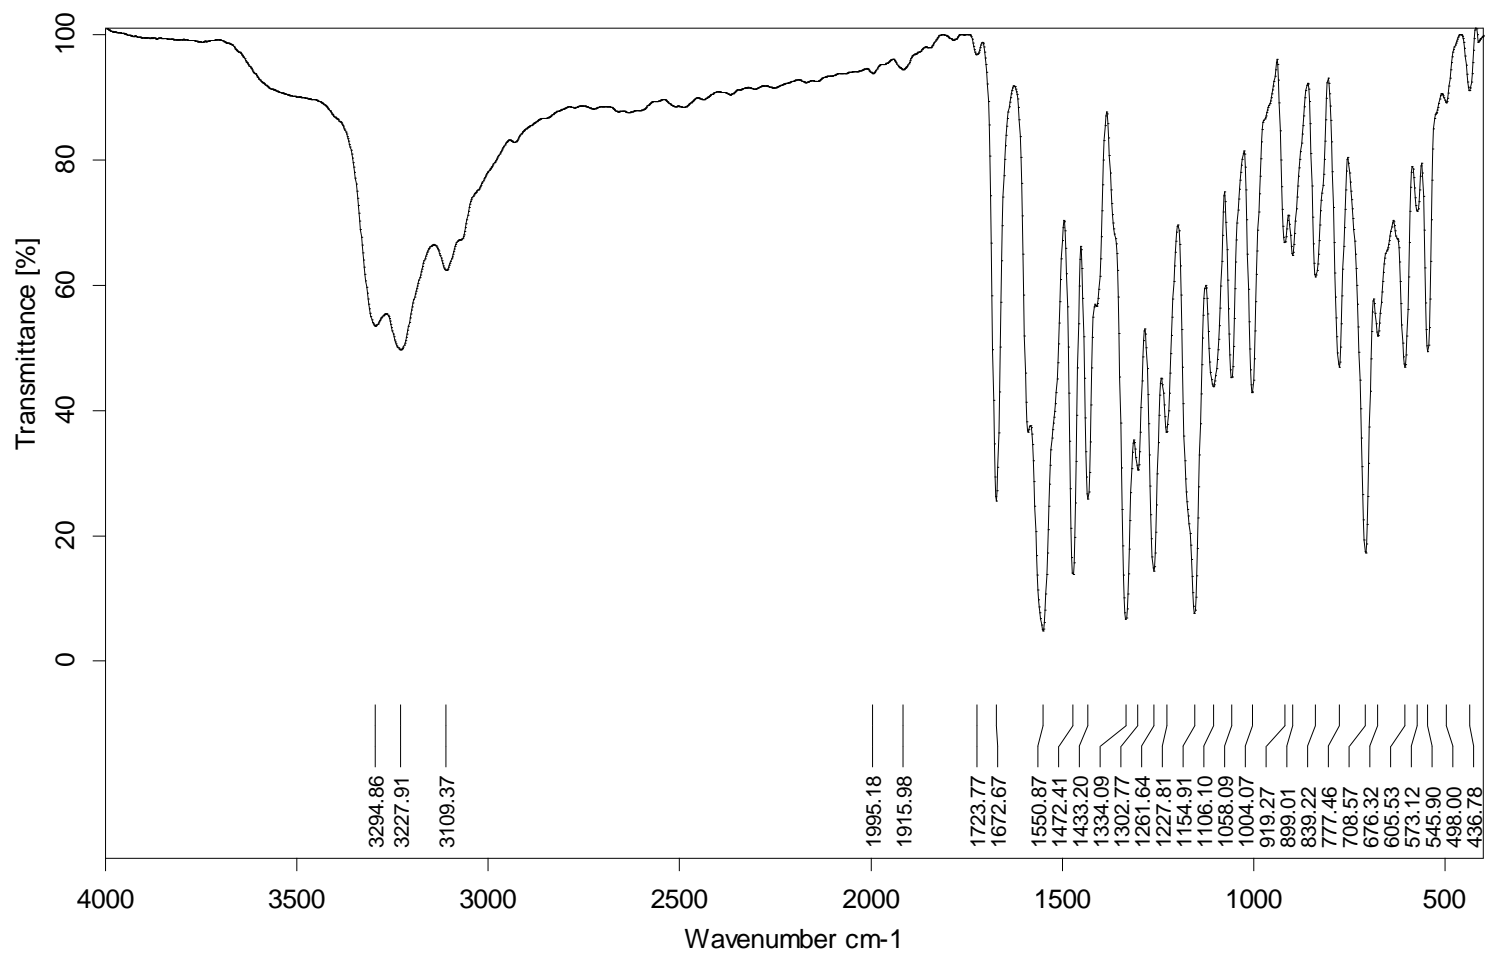

**Fig. 33** IR spectrum of **3j**.

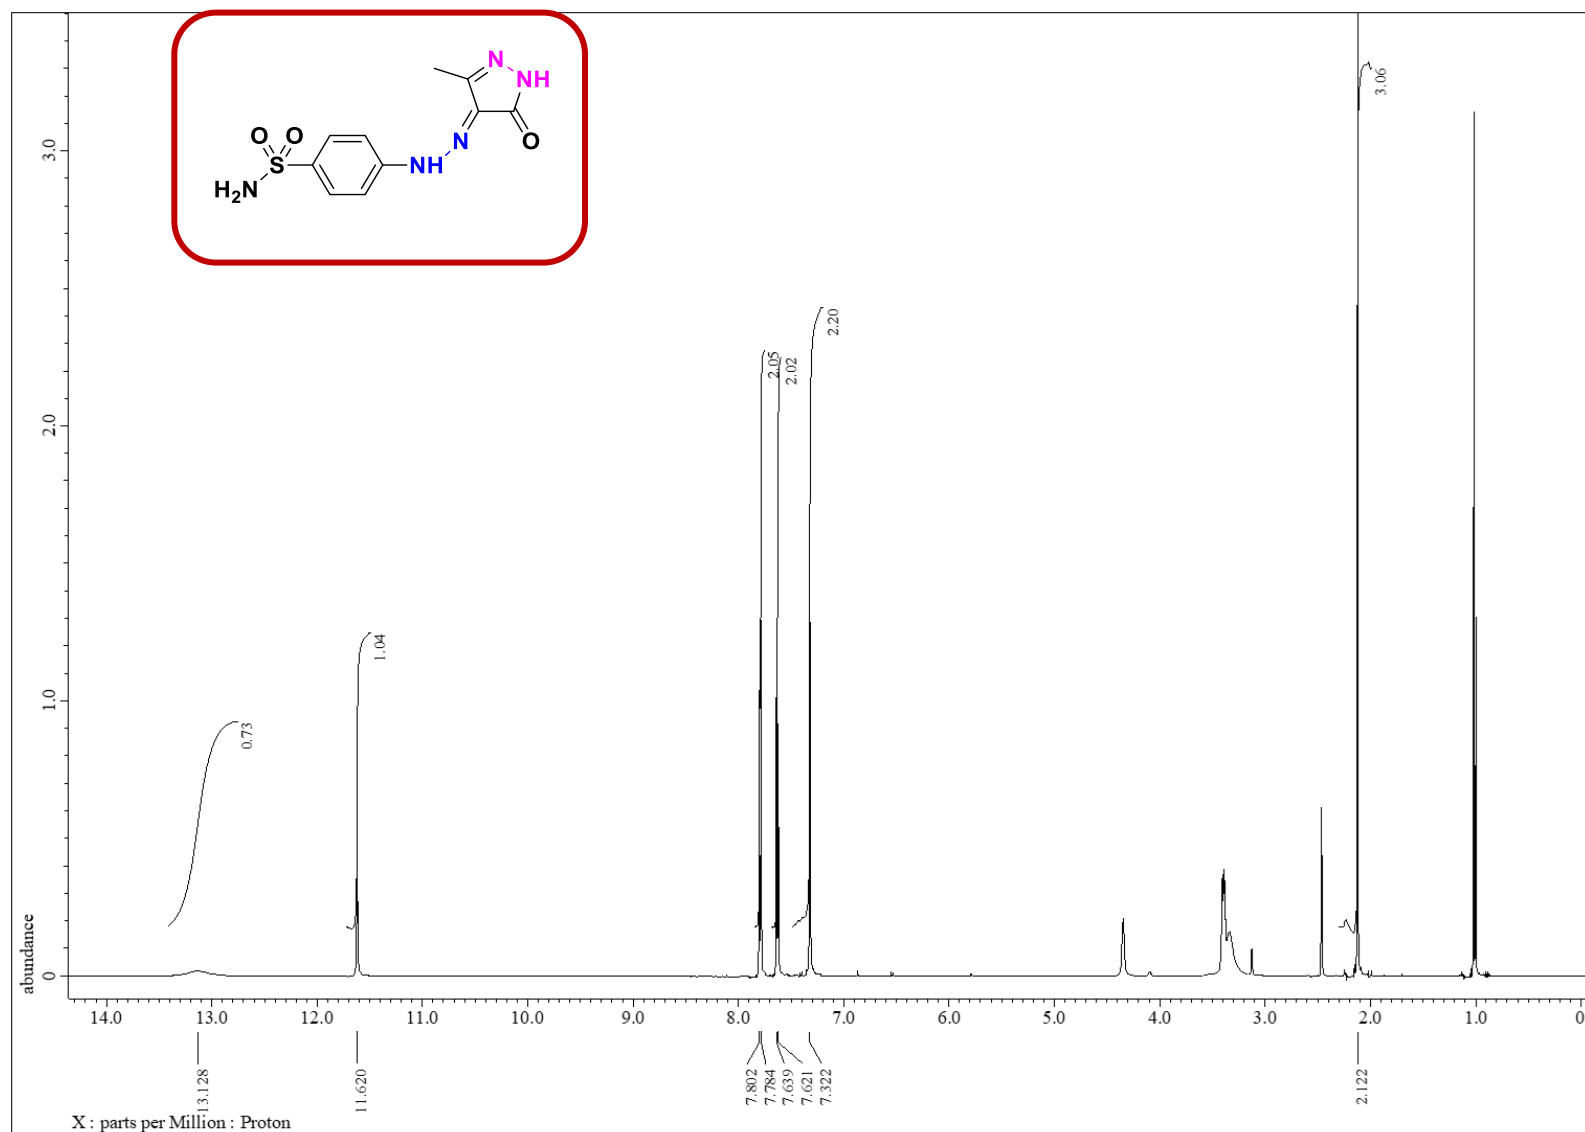

**Fig. 34** <sup>1</sup>H-NMR spectrum (500 MHz, DMSO-d<sub>6</sub>) of **4**.

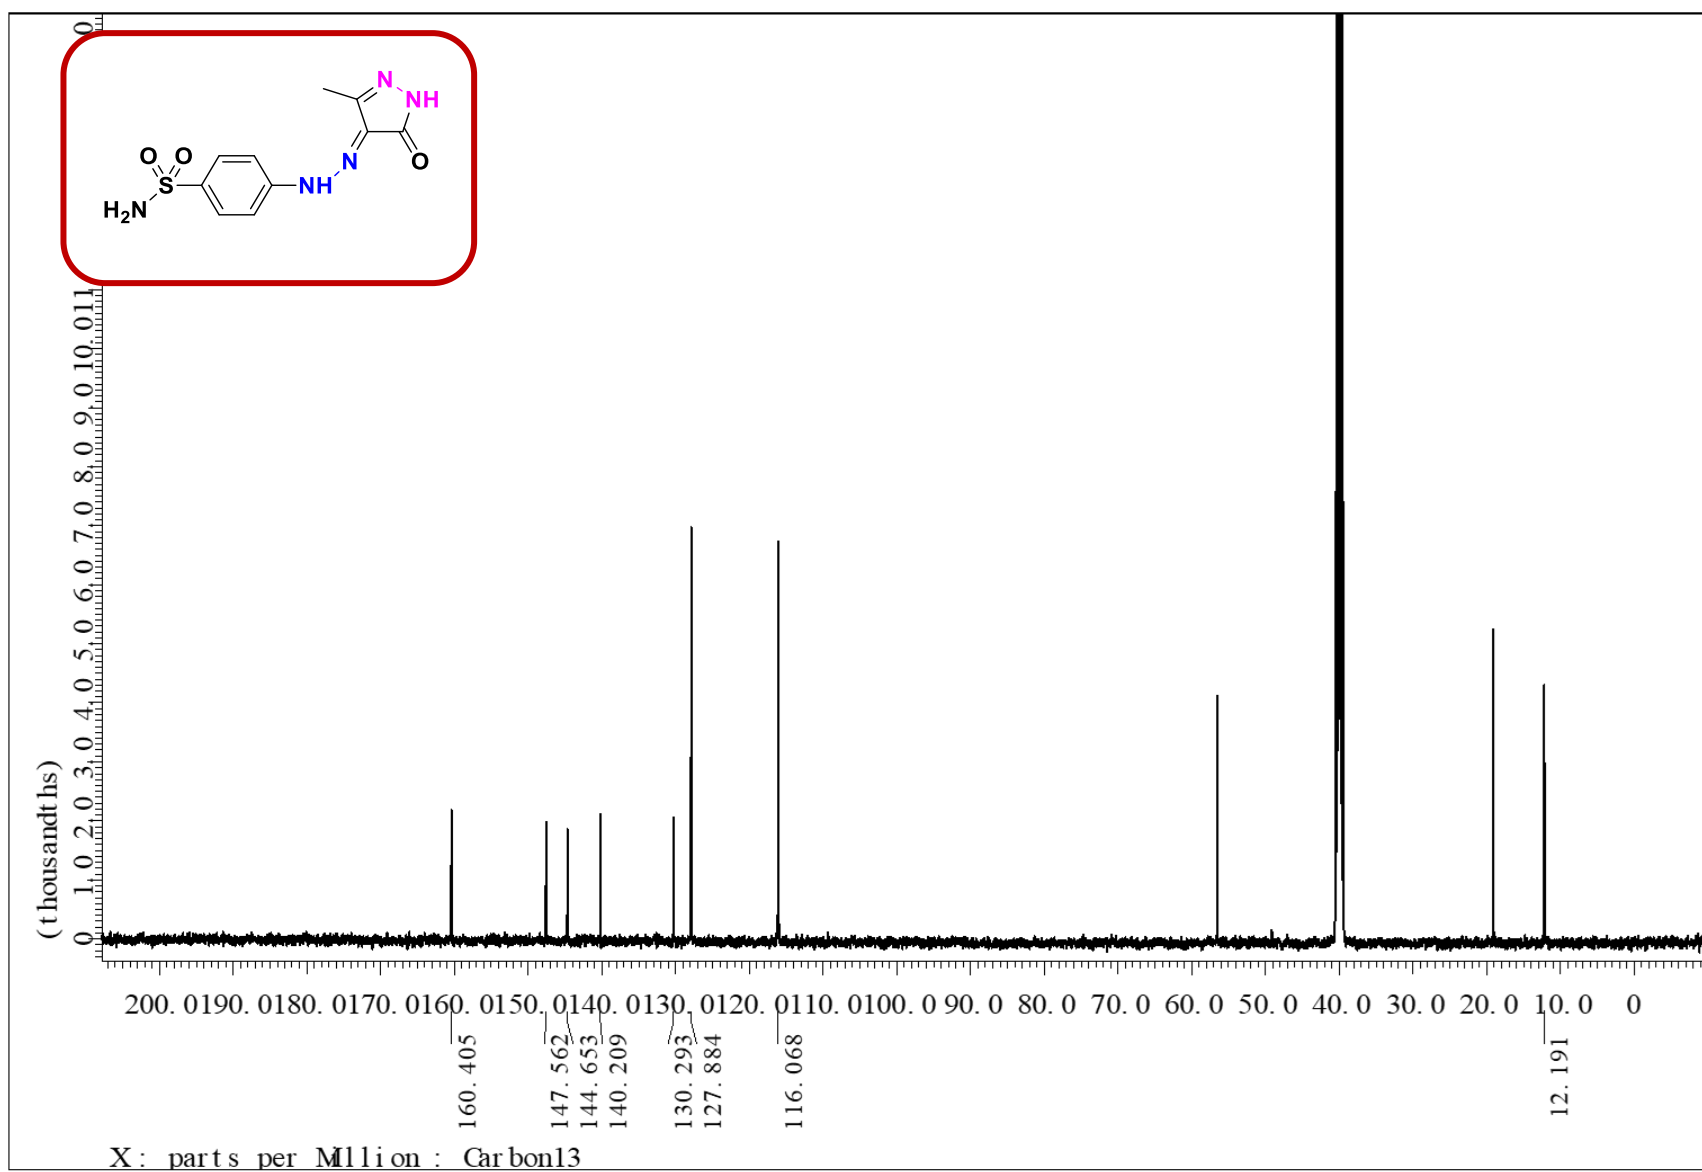

**Fig. 35**  $^{13}\text{C-NMR}$  spectrum (125 MHz, DMSO- $d_6$ ) of 4.

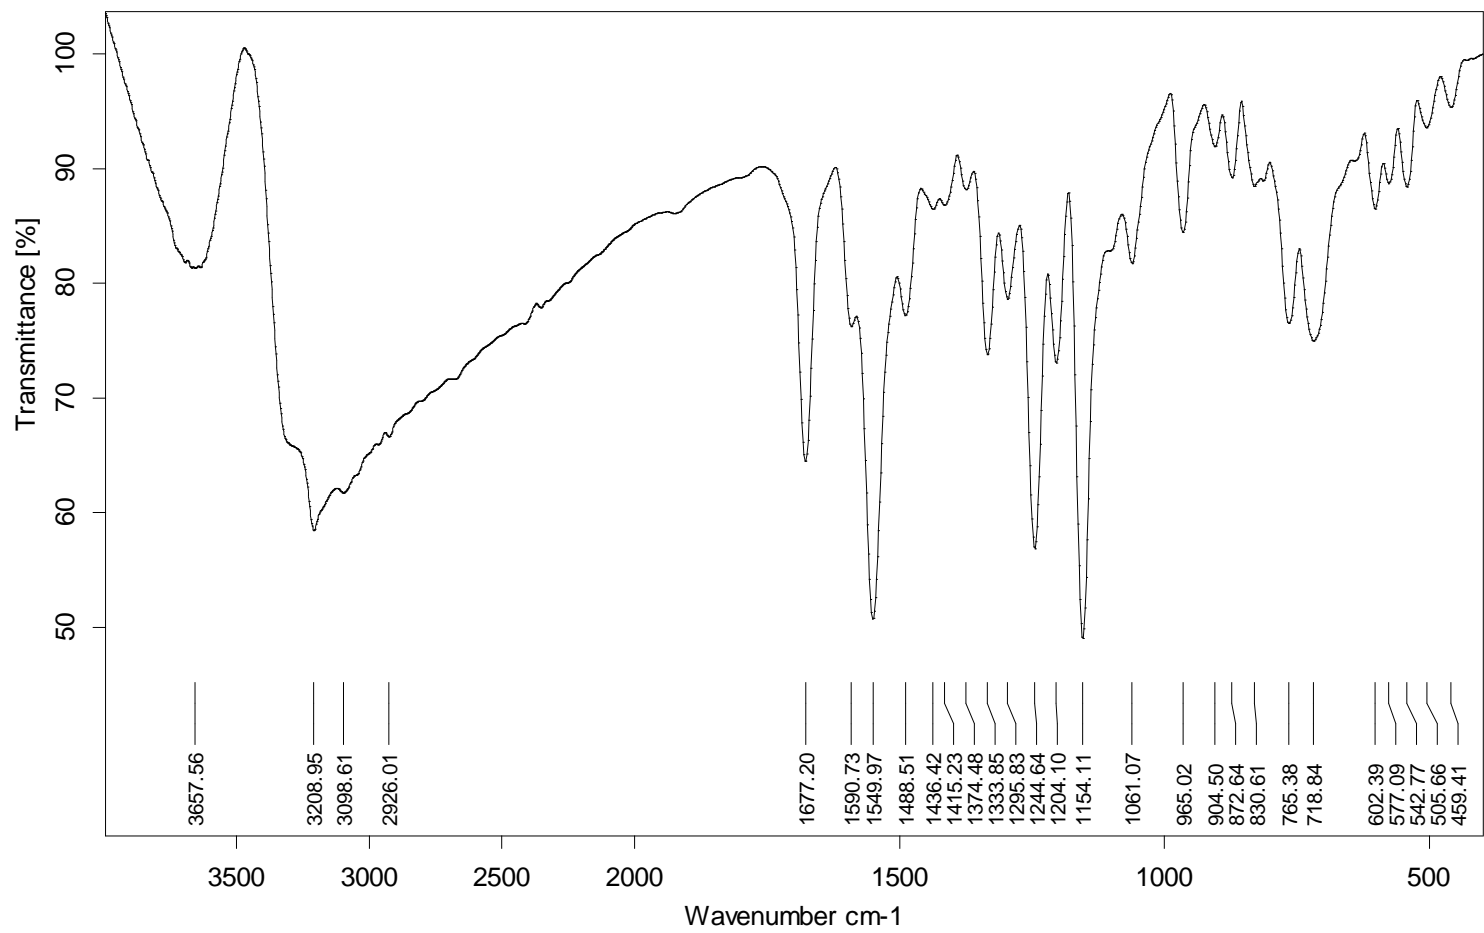

**Fig. 36** IR spectrum of **4**.

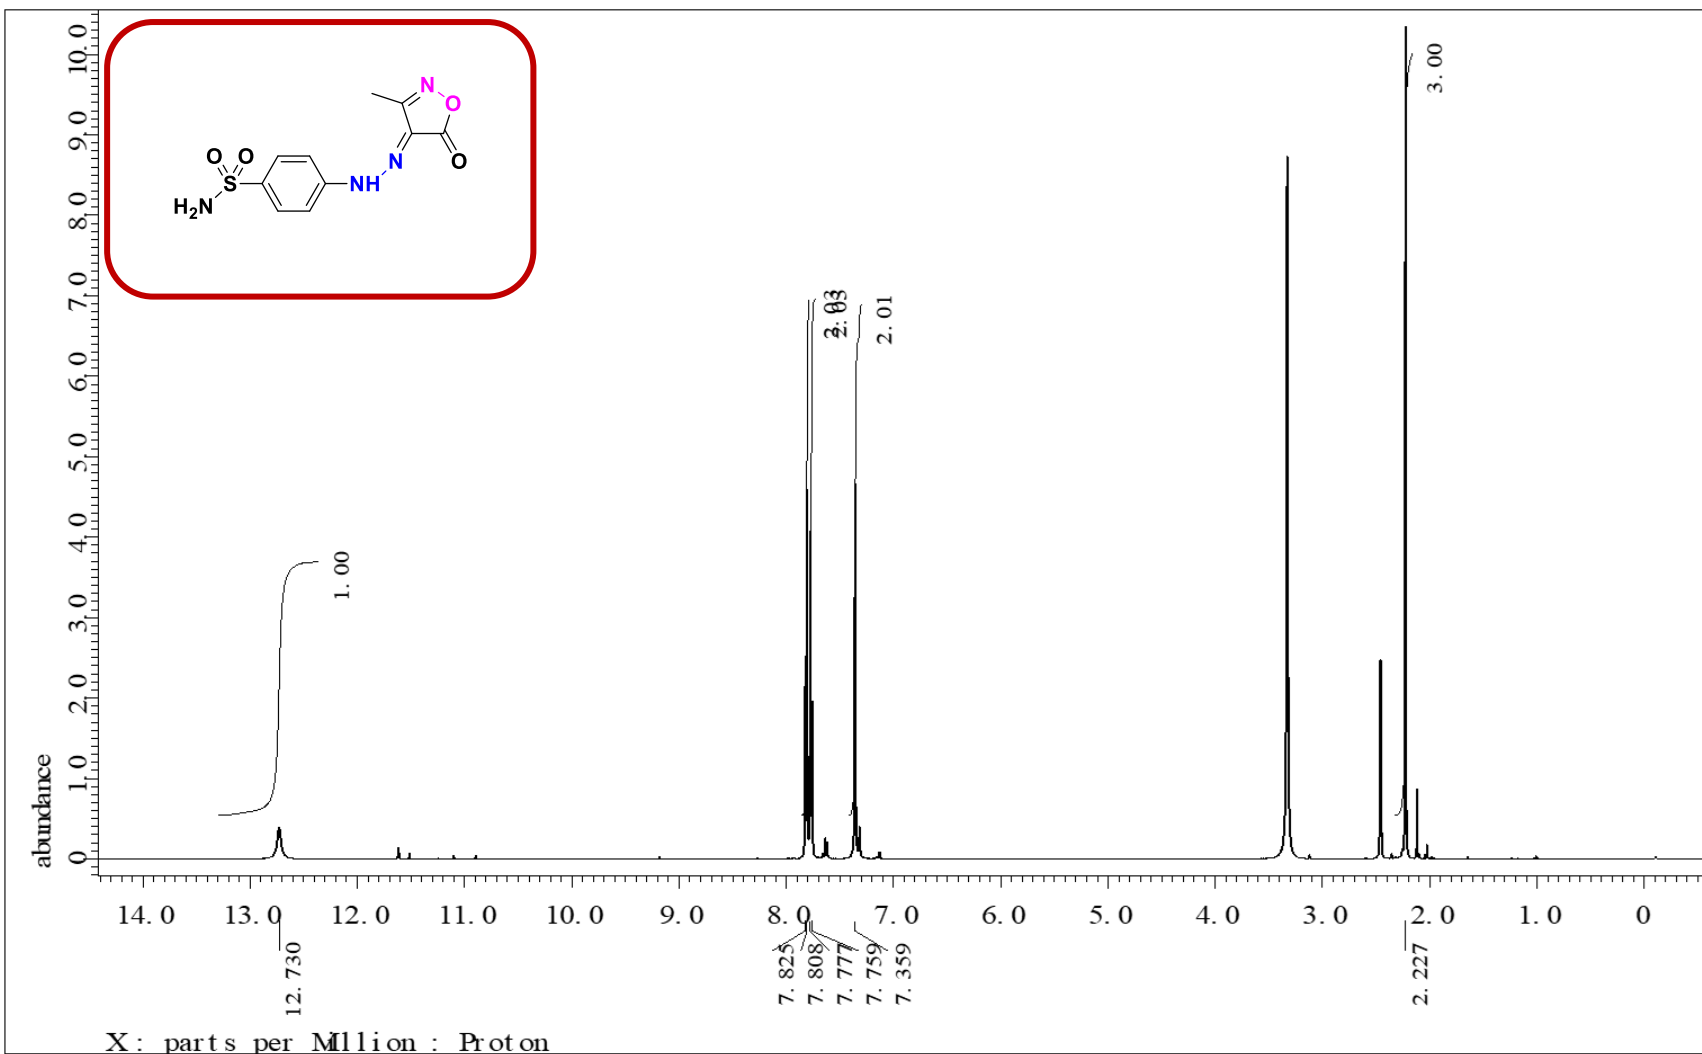

**Fig. 37**  $^1\text{H-NMR}$  spectrum (500 MHz,  $\text{DMSO-d}_6$ ) of **5**.

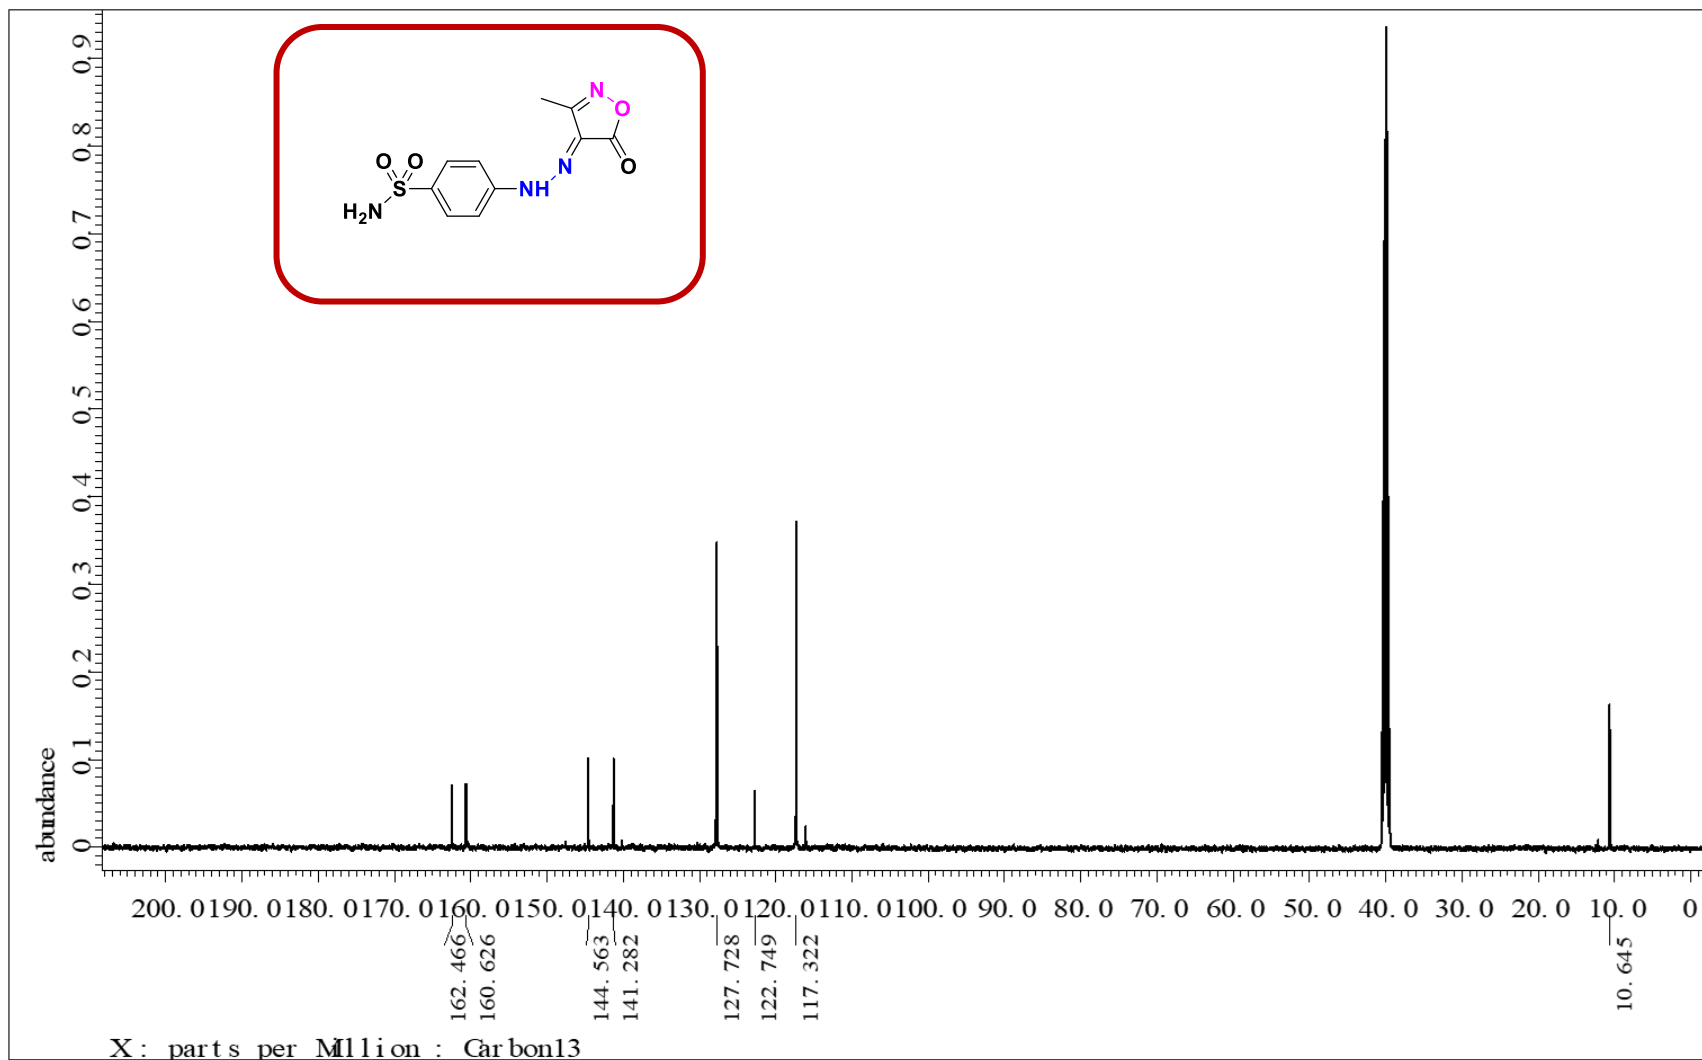

**Fig. 38**  $^{13}\text{C}$ -NMR spectrum (125 MHz, DMSO- $d_6$ ) of 5.



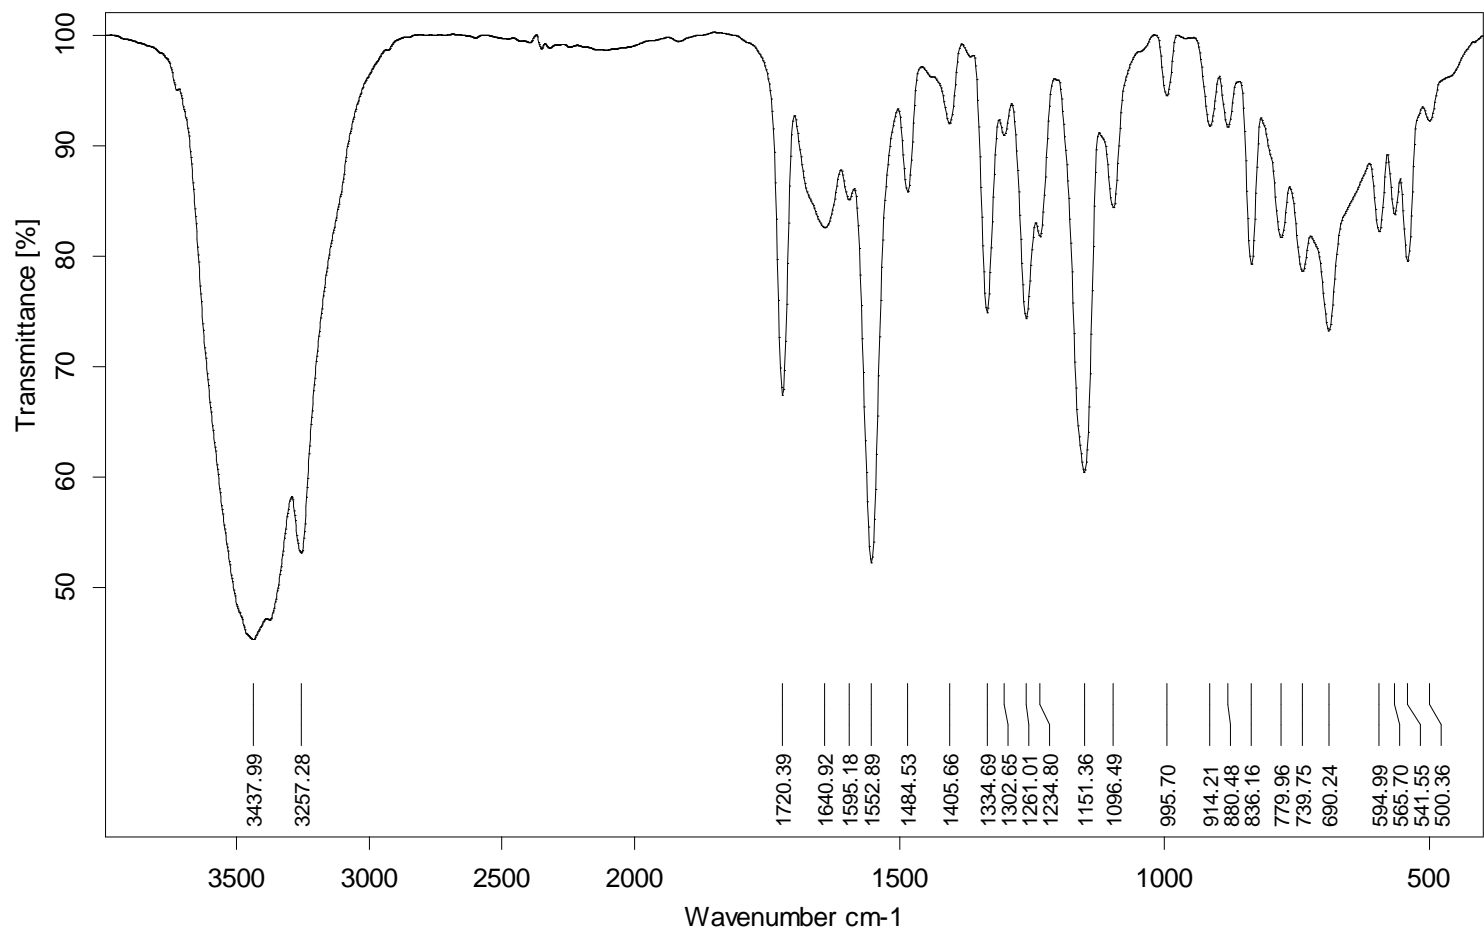

**Fig. 39** IR spectrum of **5**.

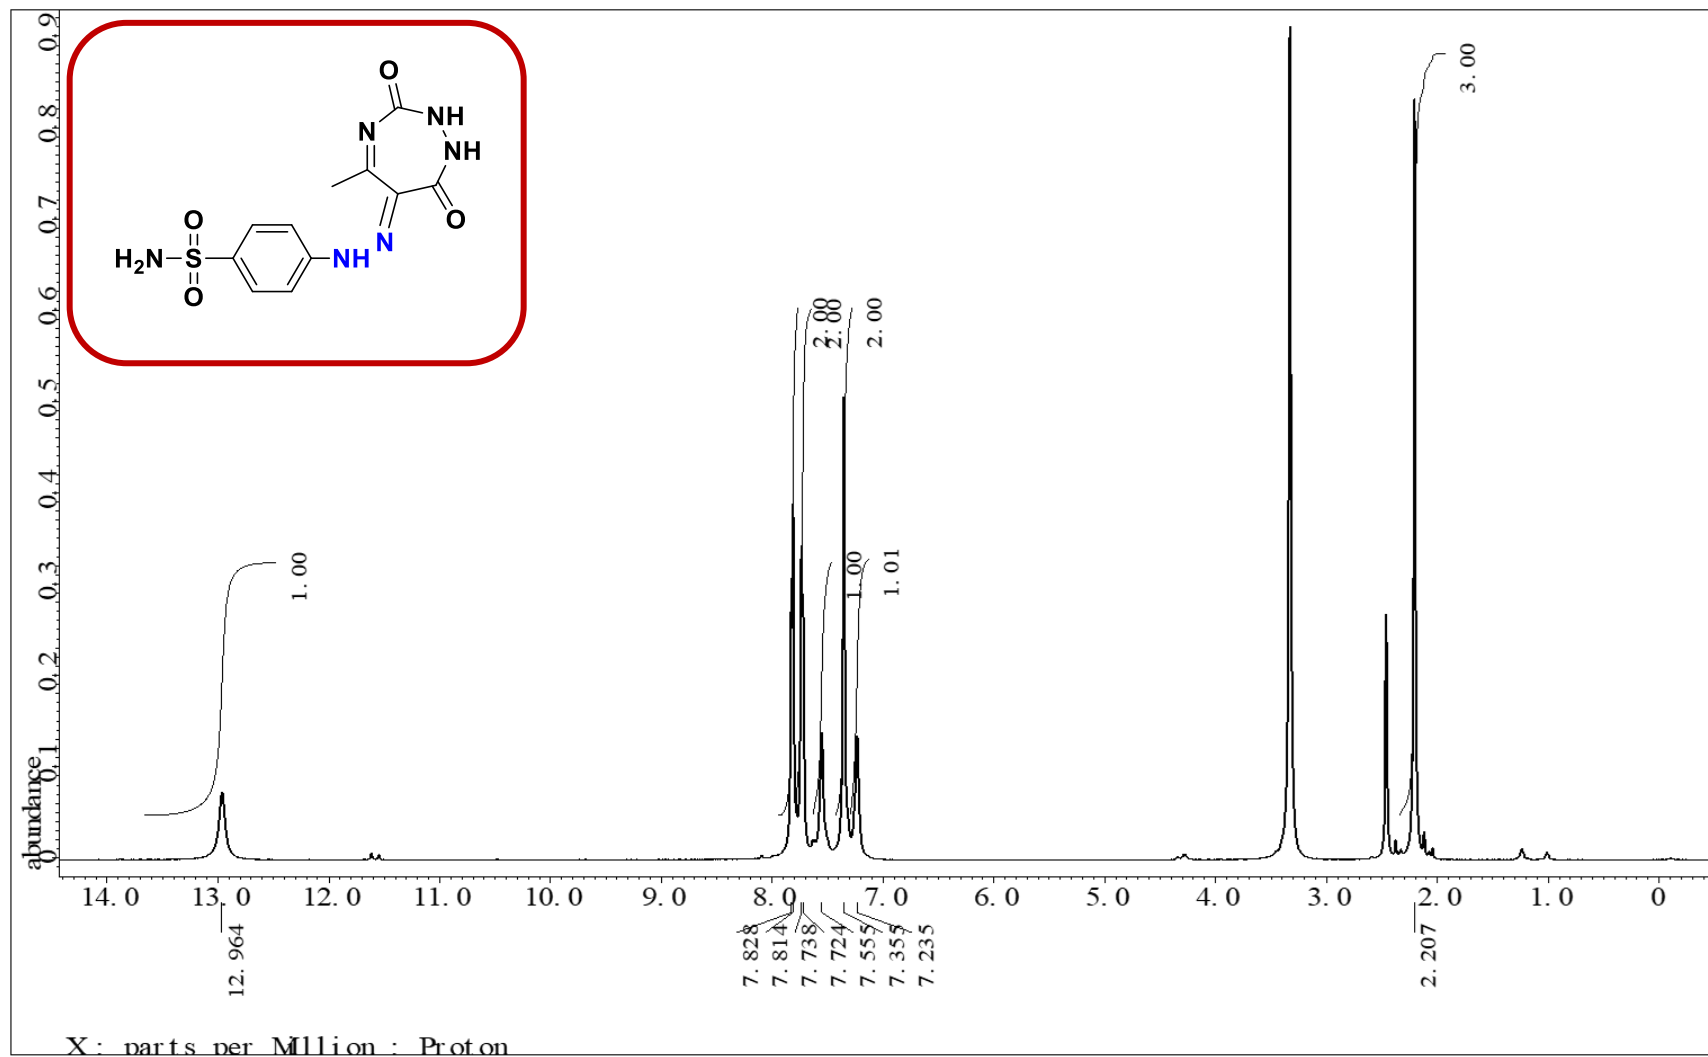

**Fig. 40**  $^1\text{H-NMR}$  spectrum (500 MHz,  $\text{DMSO-d}_6$ ) of 6.

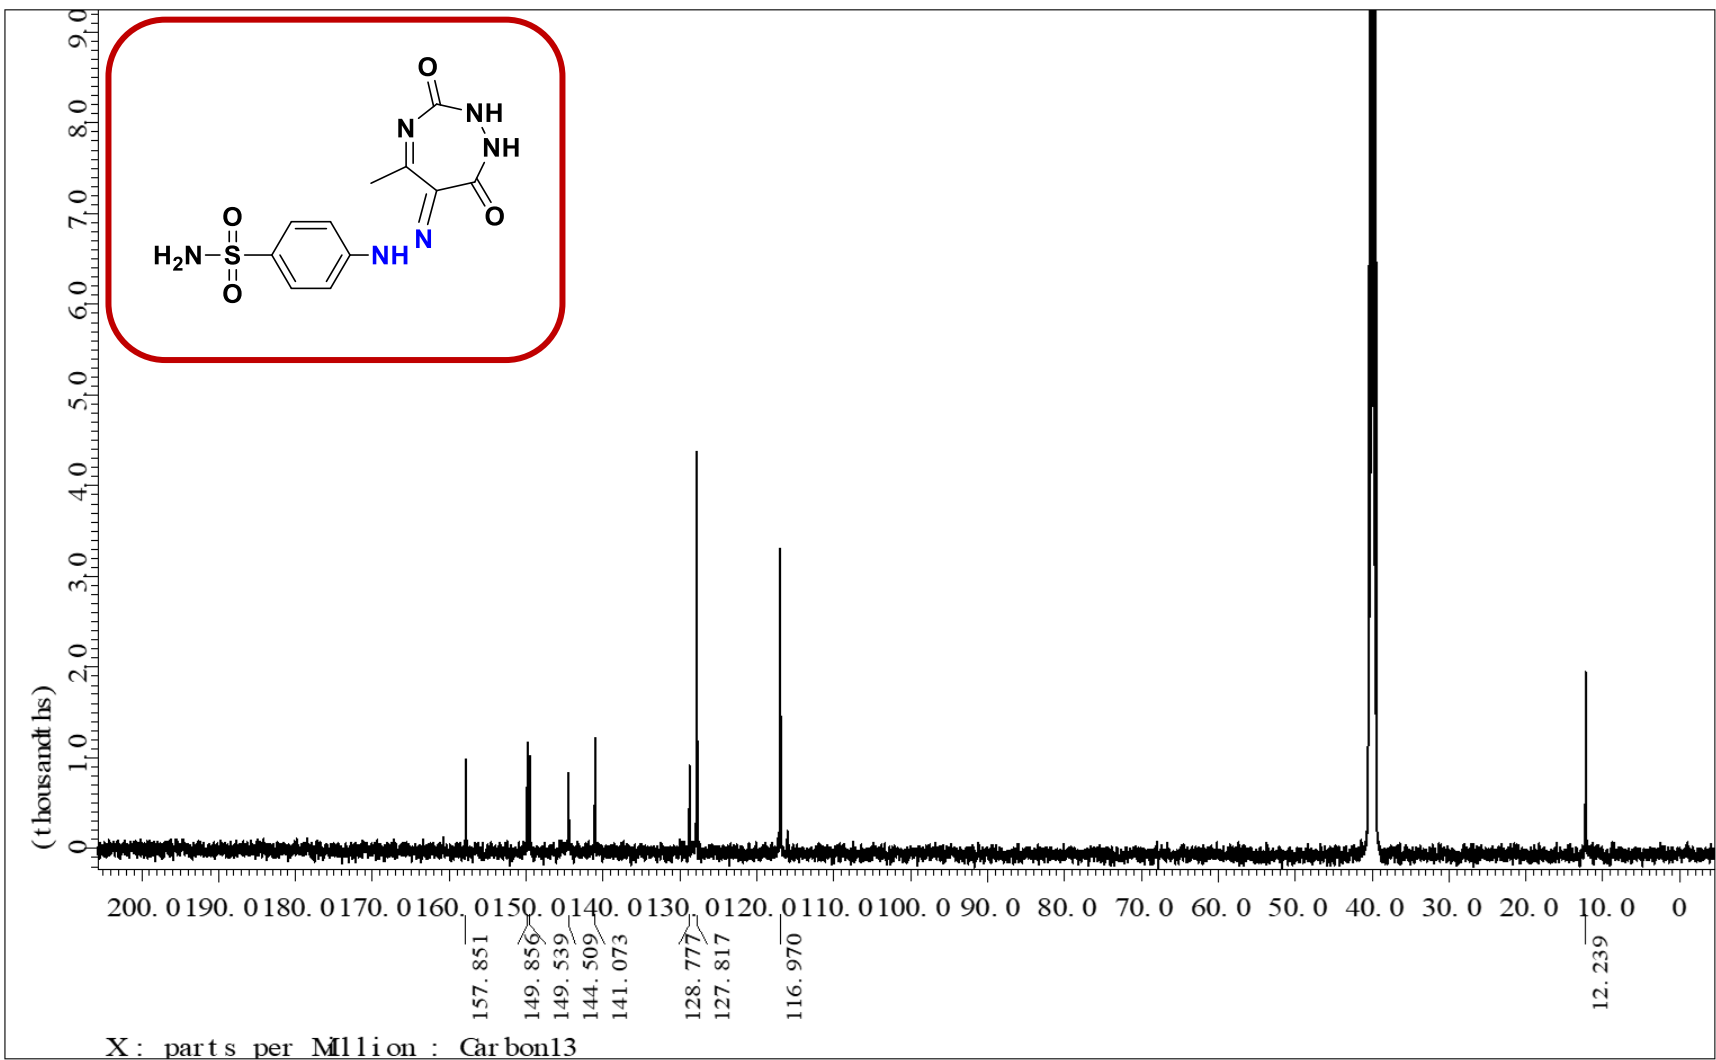

**Fig. 41**  $^{13}\text{C-NMR}$  spectrum (125 MHz,  $\text{DMSO-d}_6$ ) of 6.

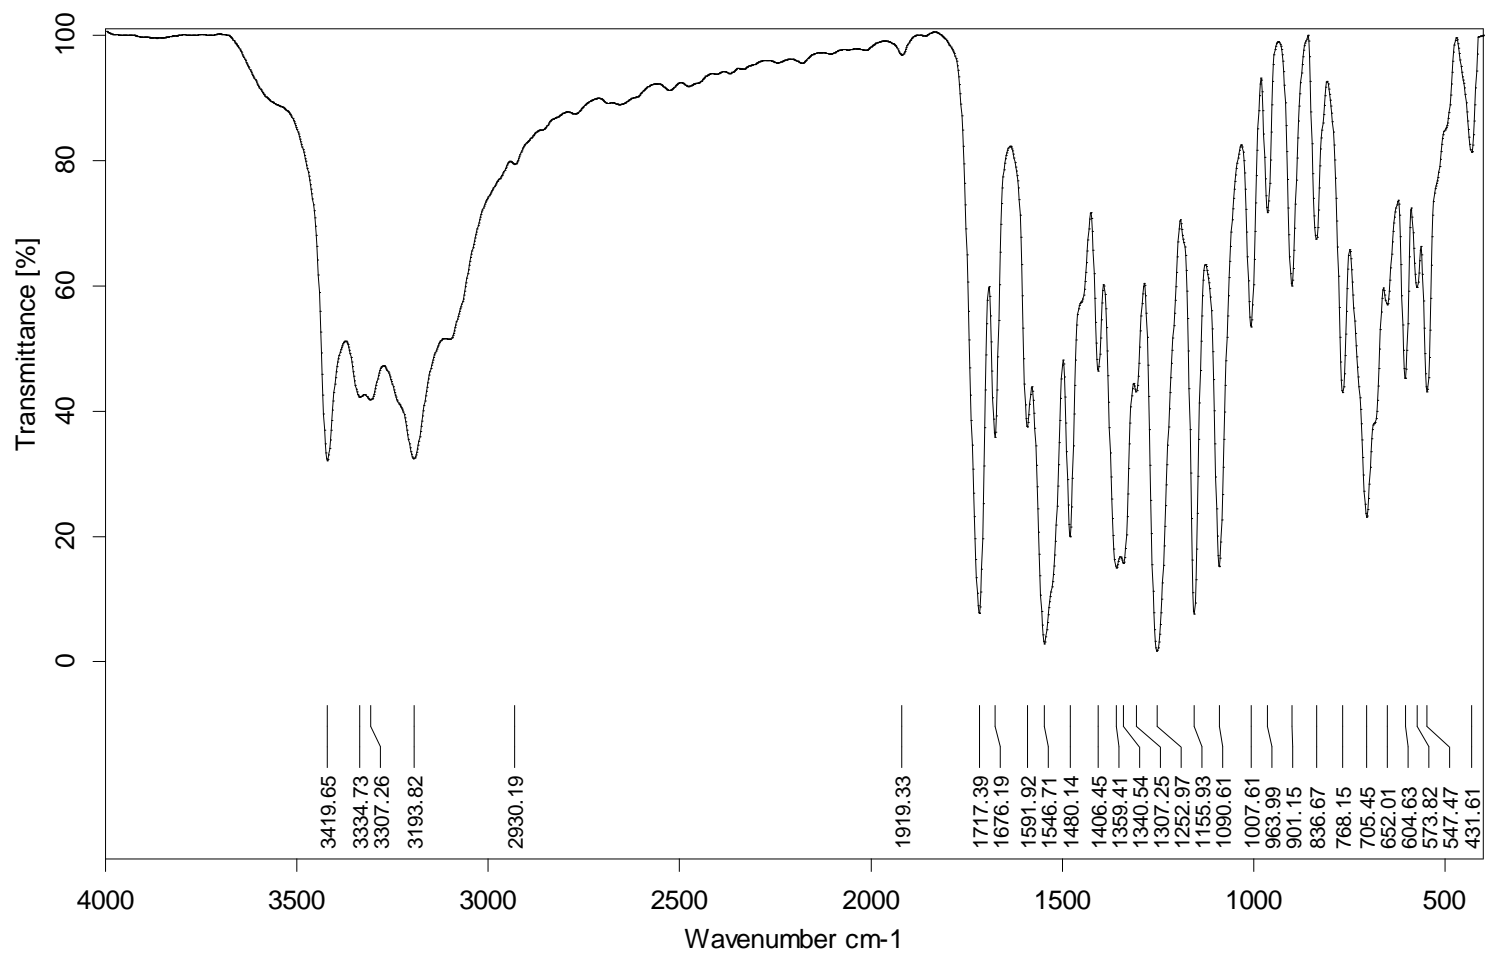

**Fig. 42** IR spectrum of **6**.

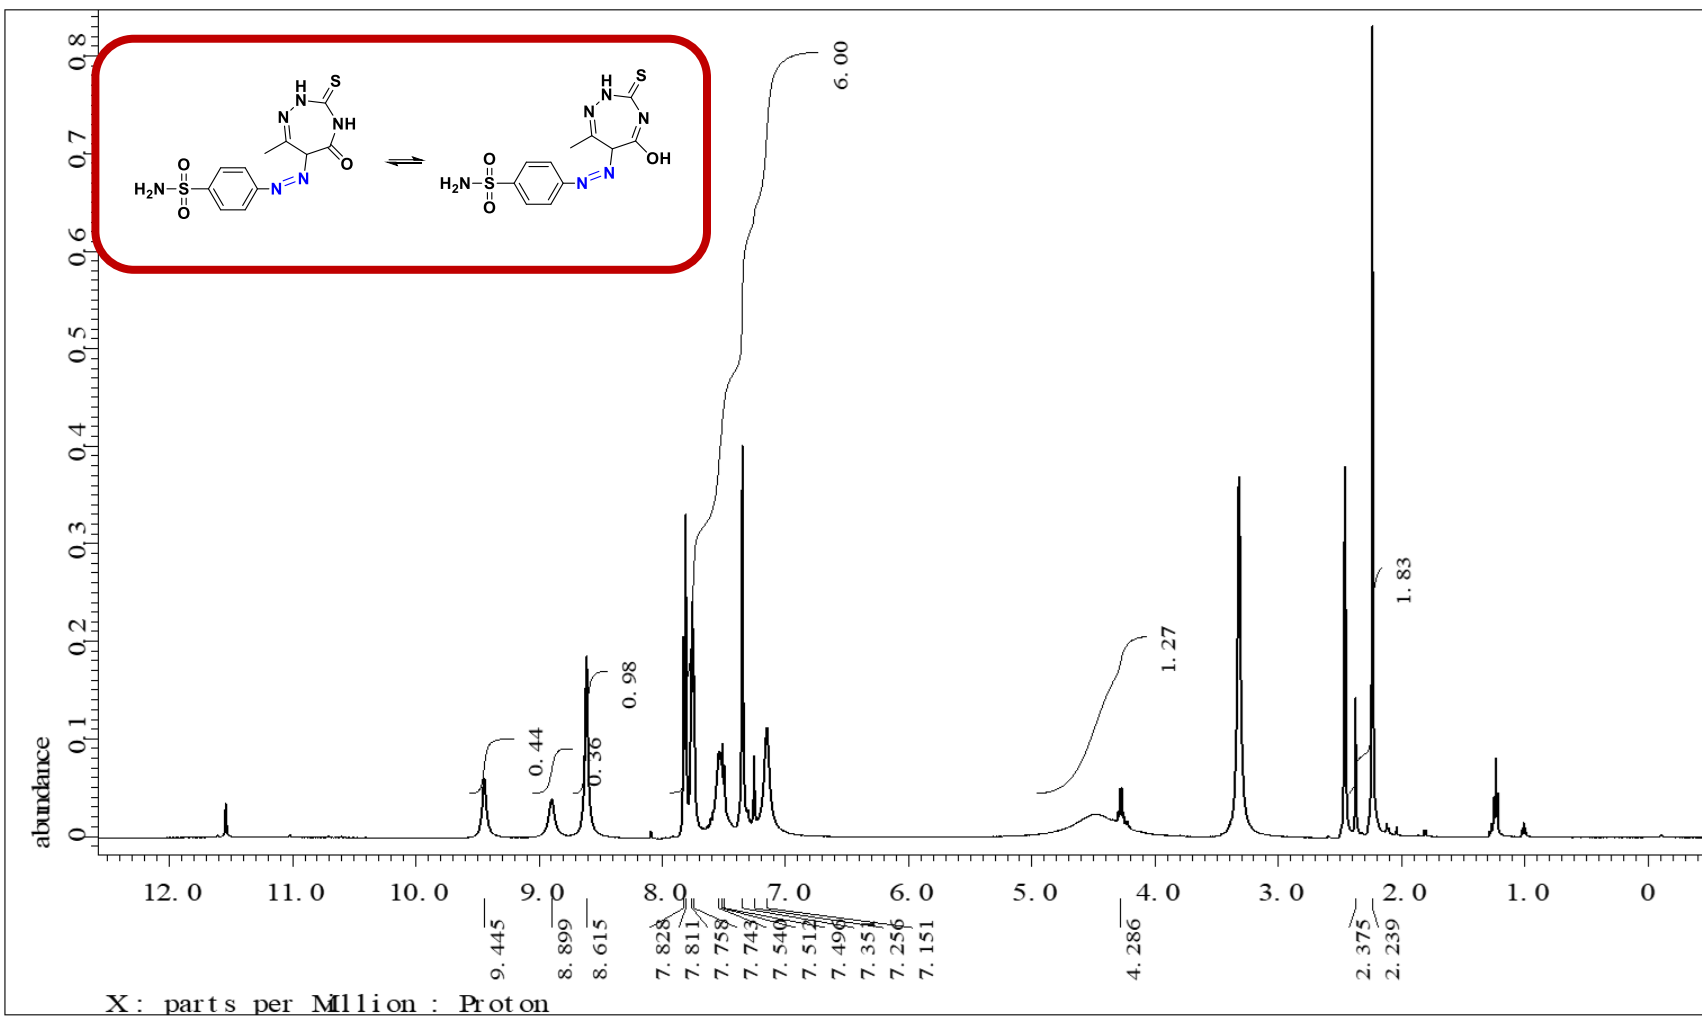

**Fig. 43**  $^1\text{H-NMR}$  spectrum (500 MHz,  $\text{DMSO-d}_6$ ) of 7.

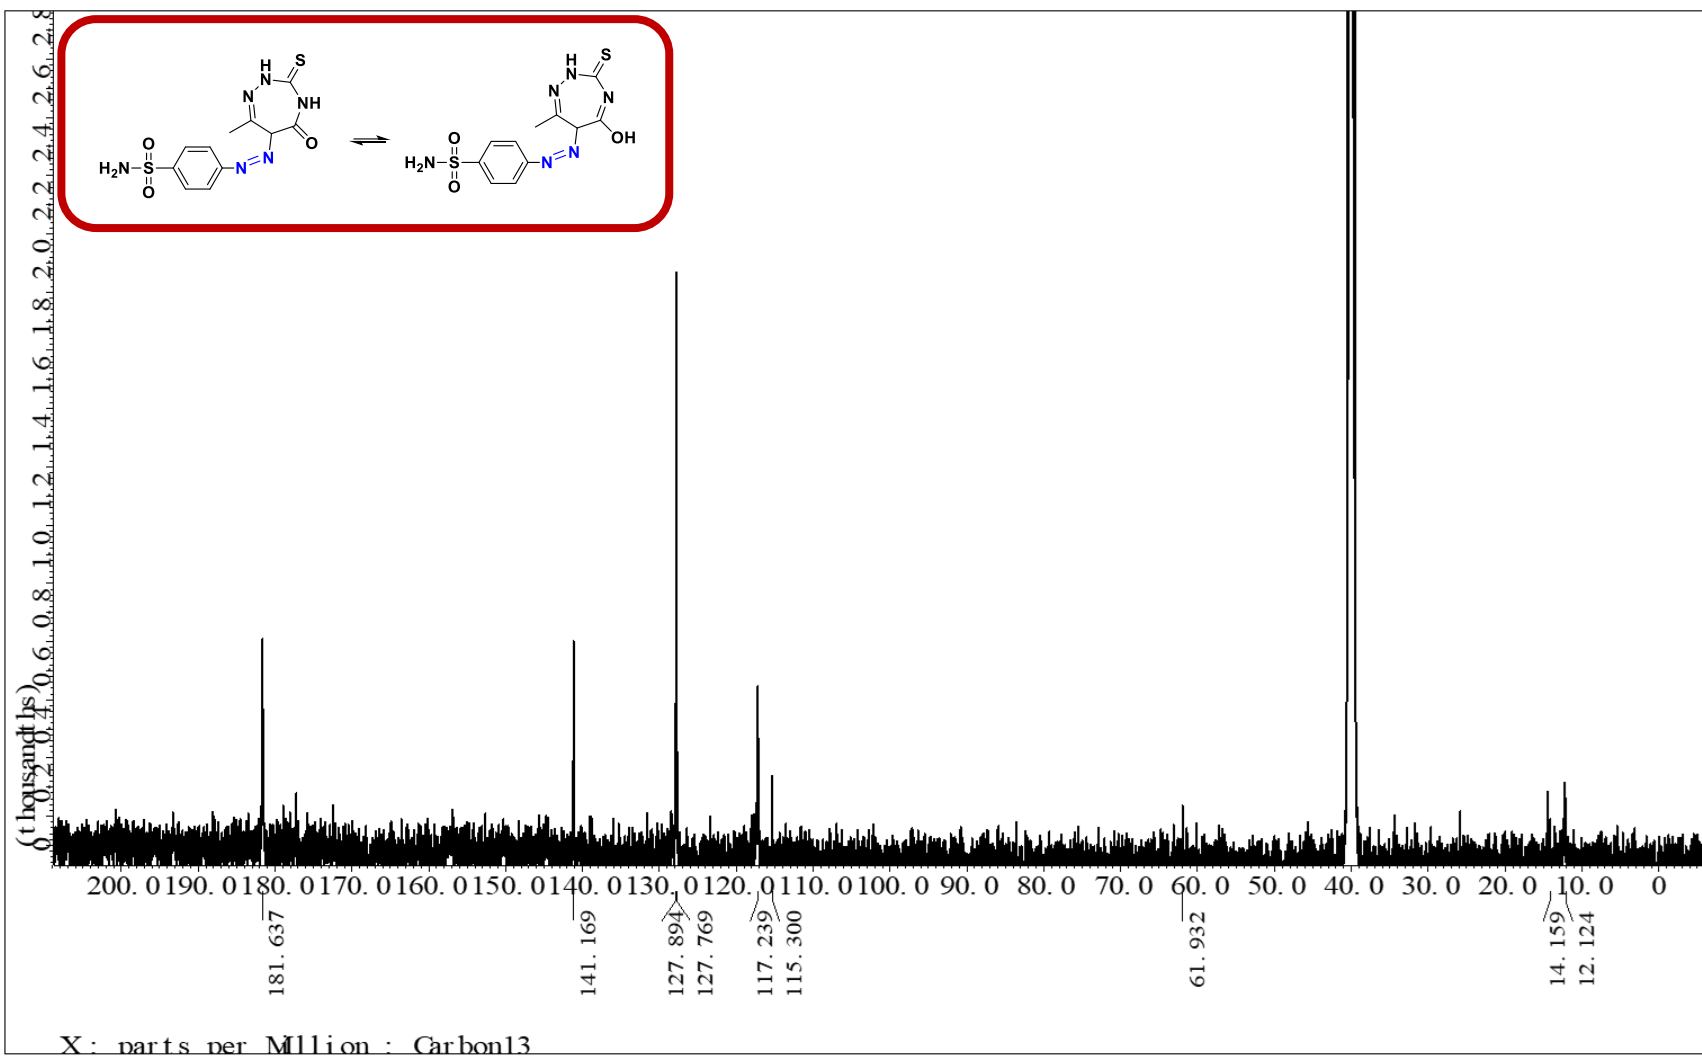

**Fig. 44**  $^{13}\text{C-NMR}$  spectrum (125 MHz, DMSO- $d_6$ ) of 7

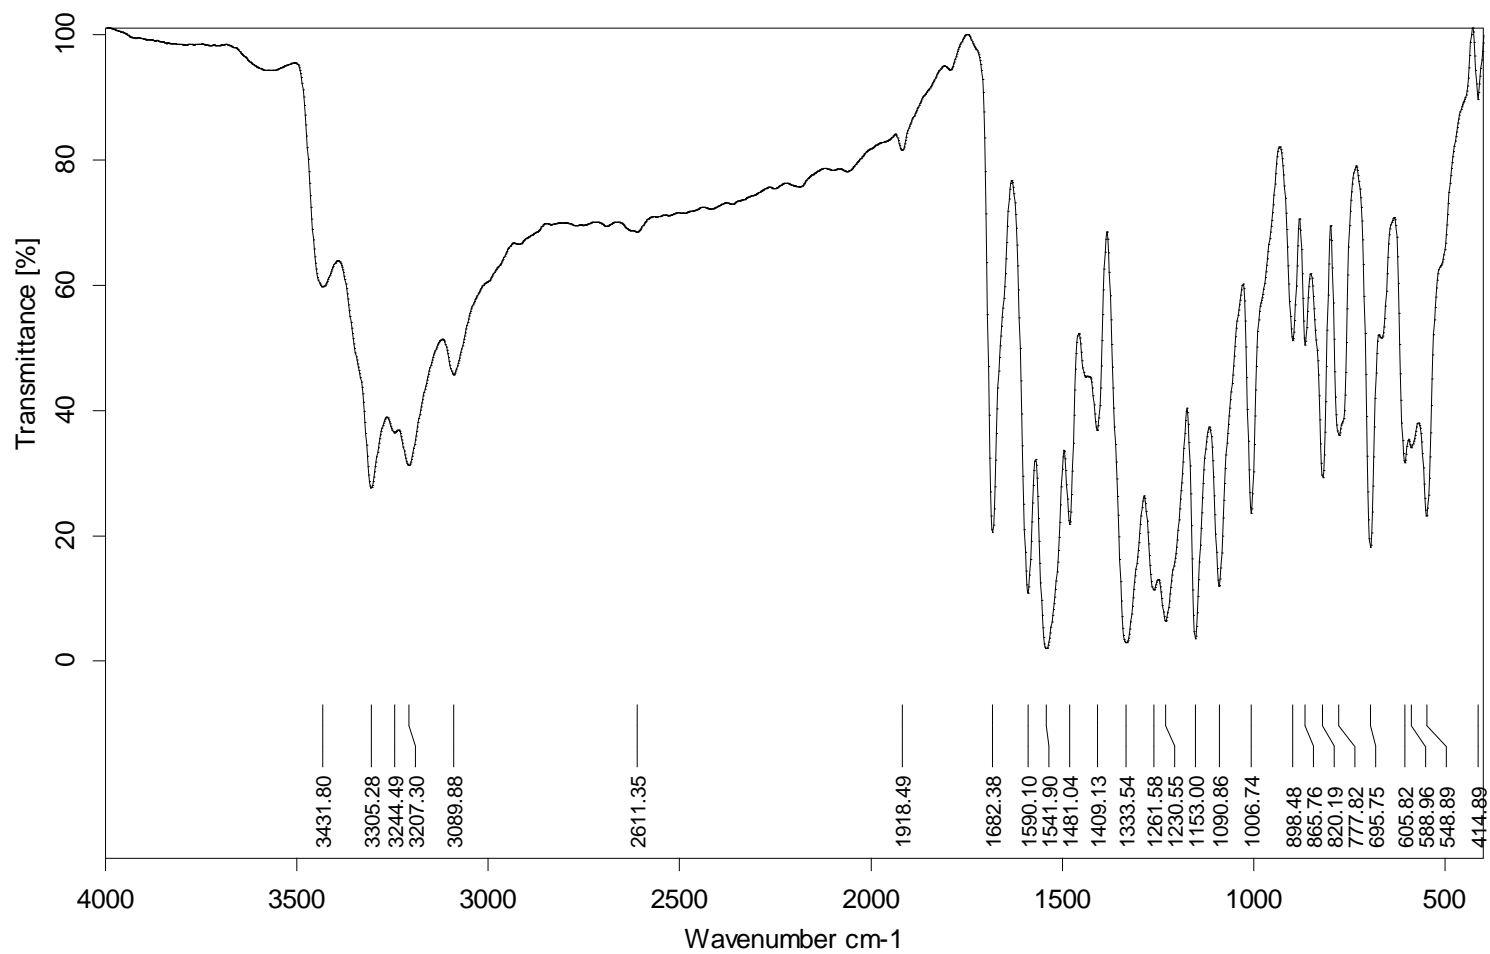

**Fig. 45** IR spectrum of **7**.

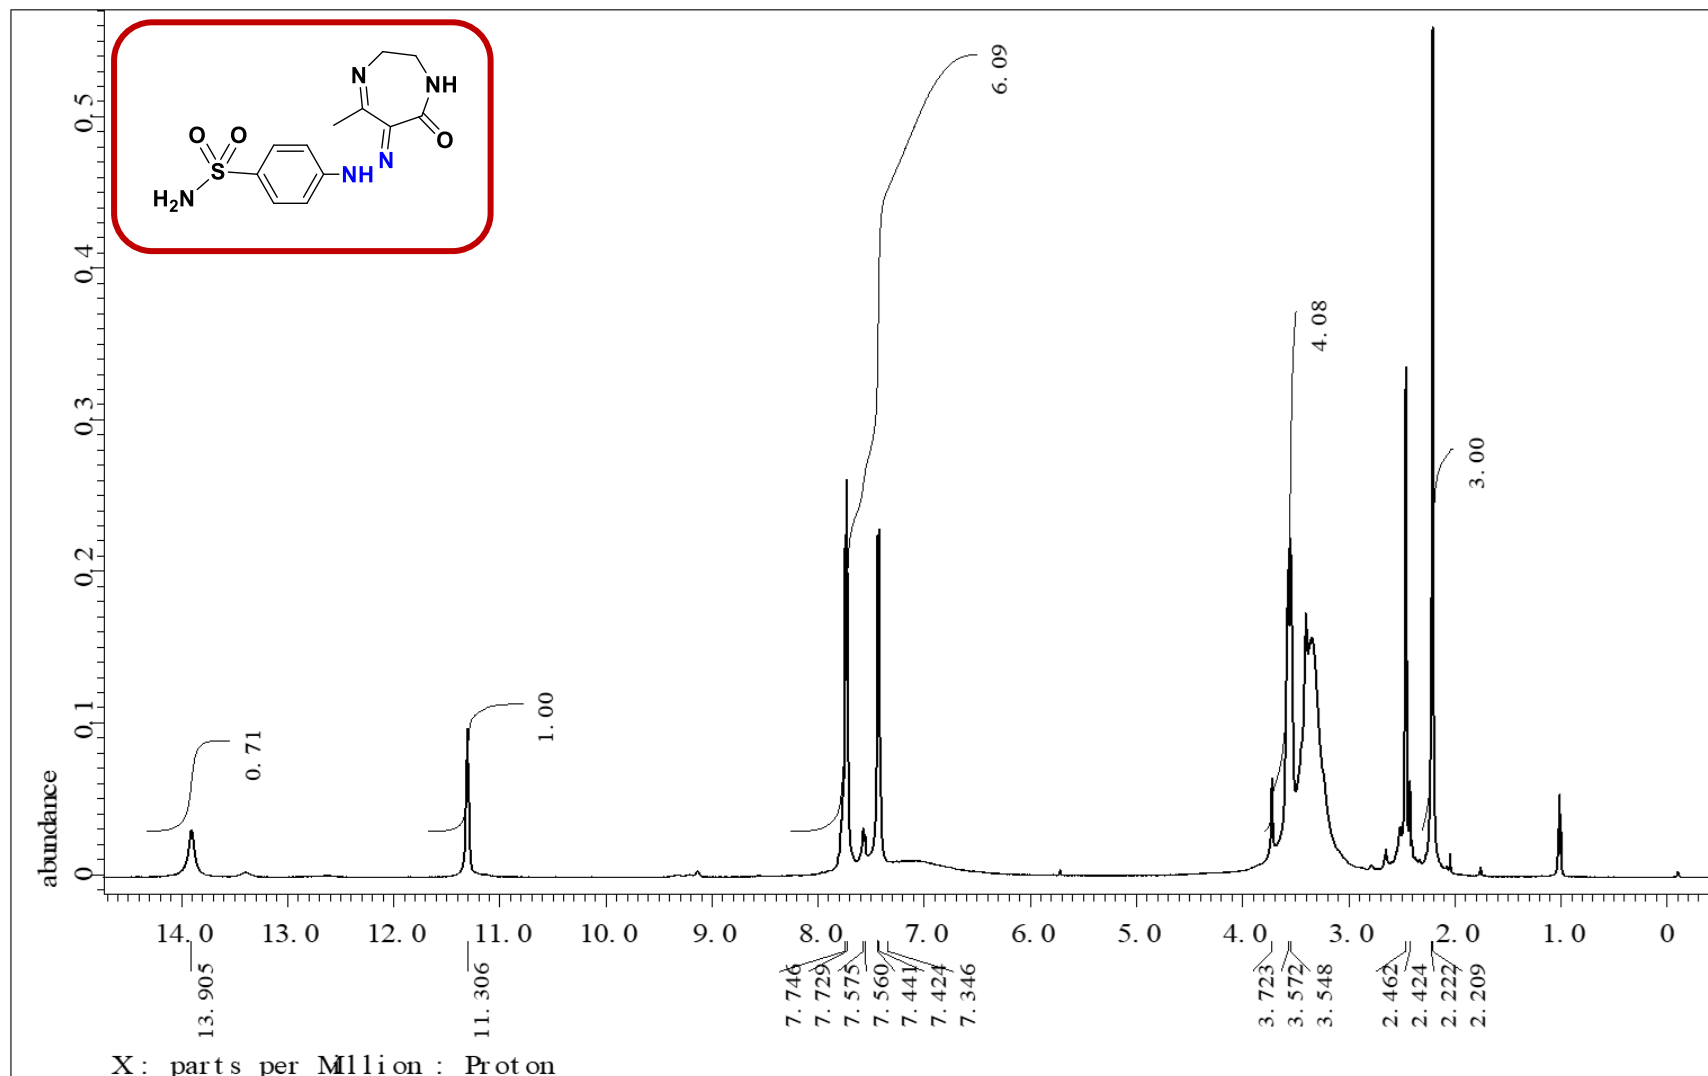

**Fig. 46** <sup>1</sup>H-NMR spectrum (500 MHz, DMSO-d<sub>6</sub>) of **8**.



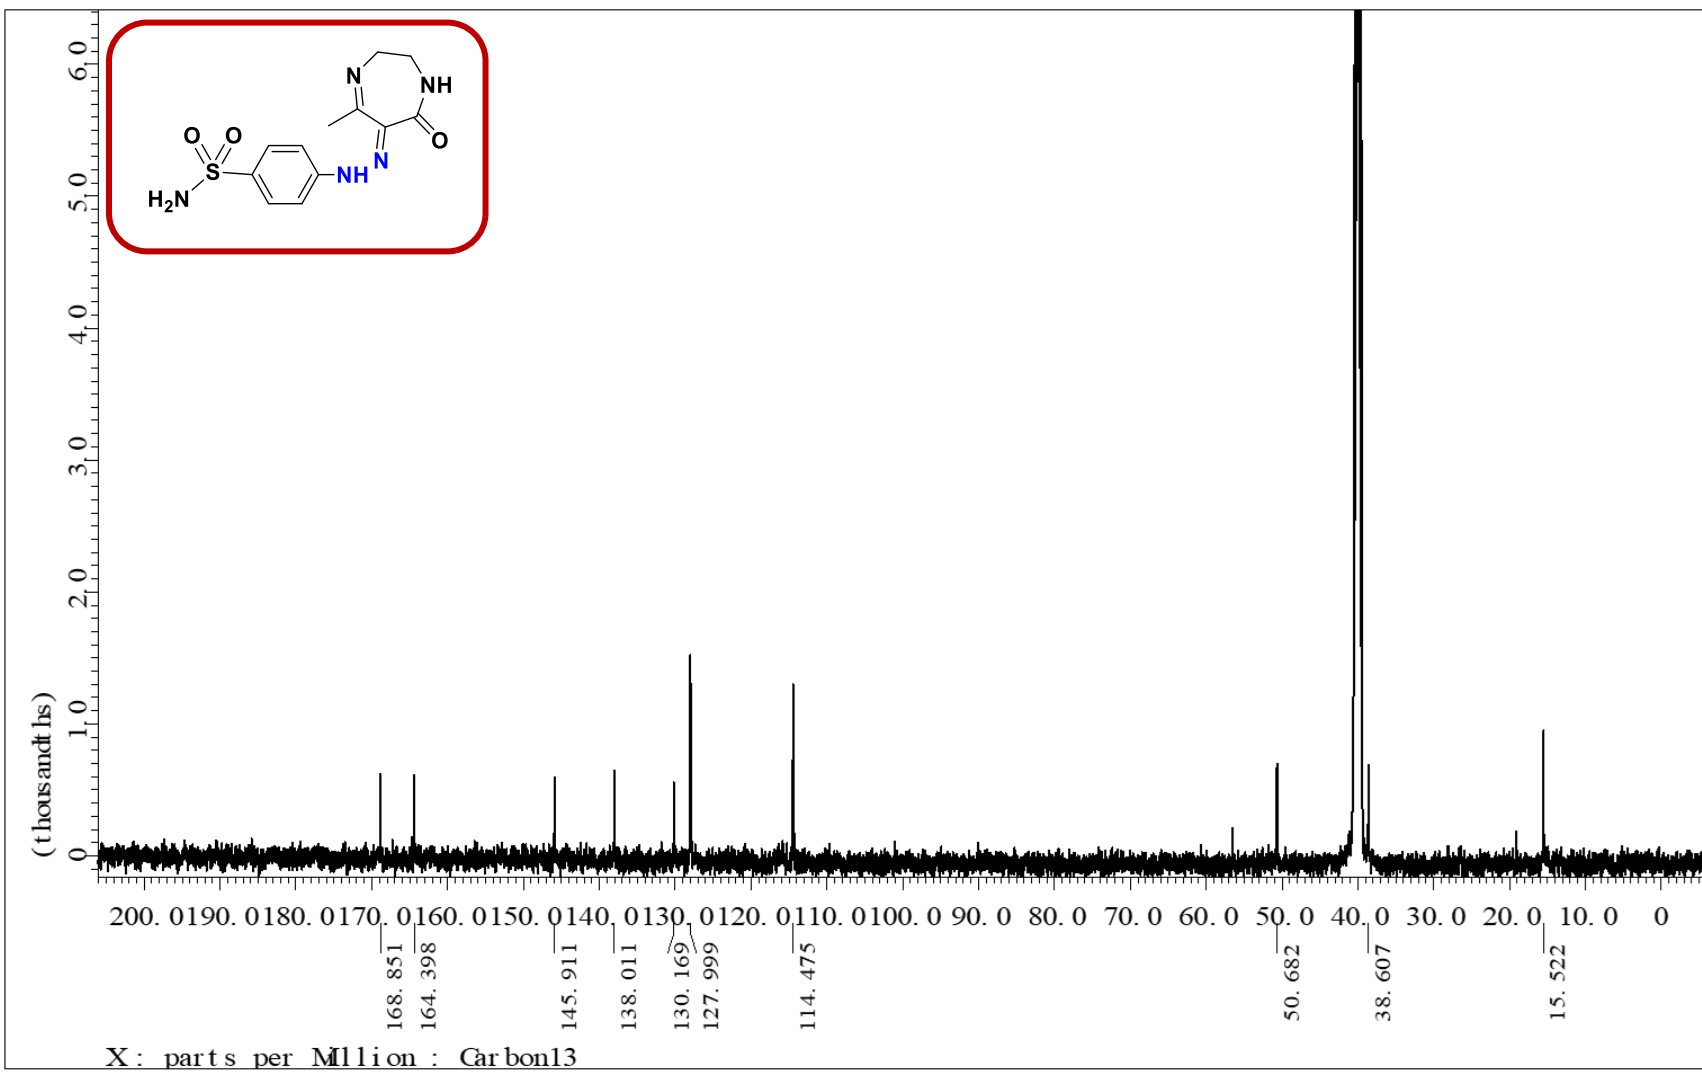

**Fig. 47**  $^{13}\text{C-NMR}$  spectrum (125 MHz, DMSO- $d_6$ ) of **8**.

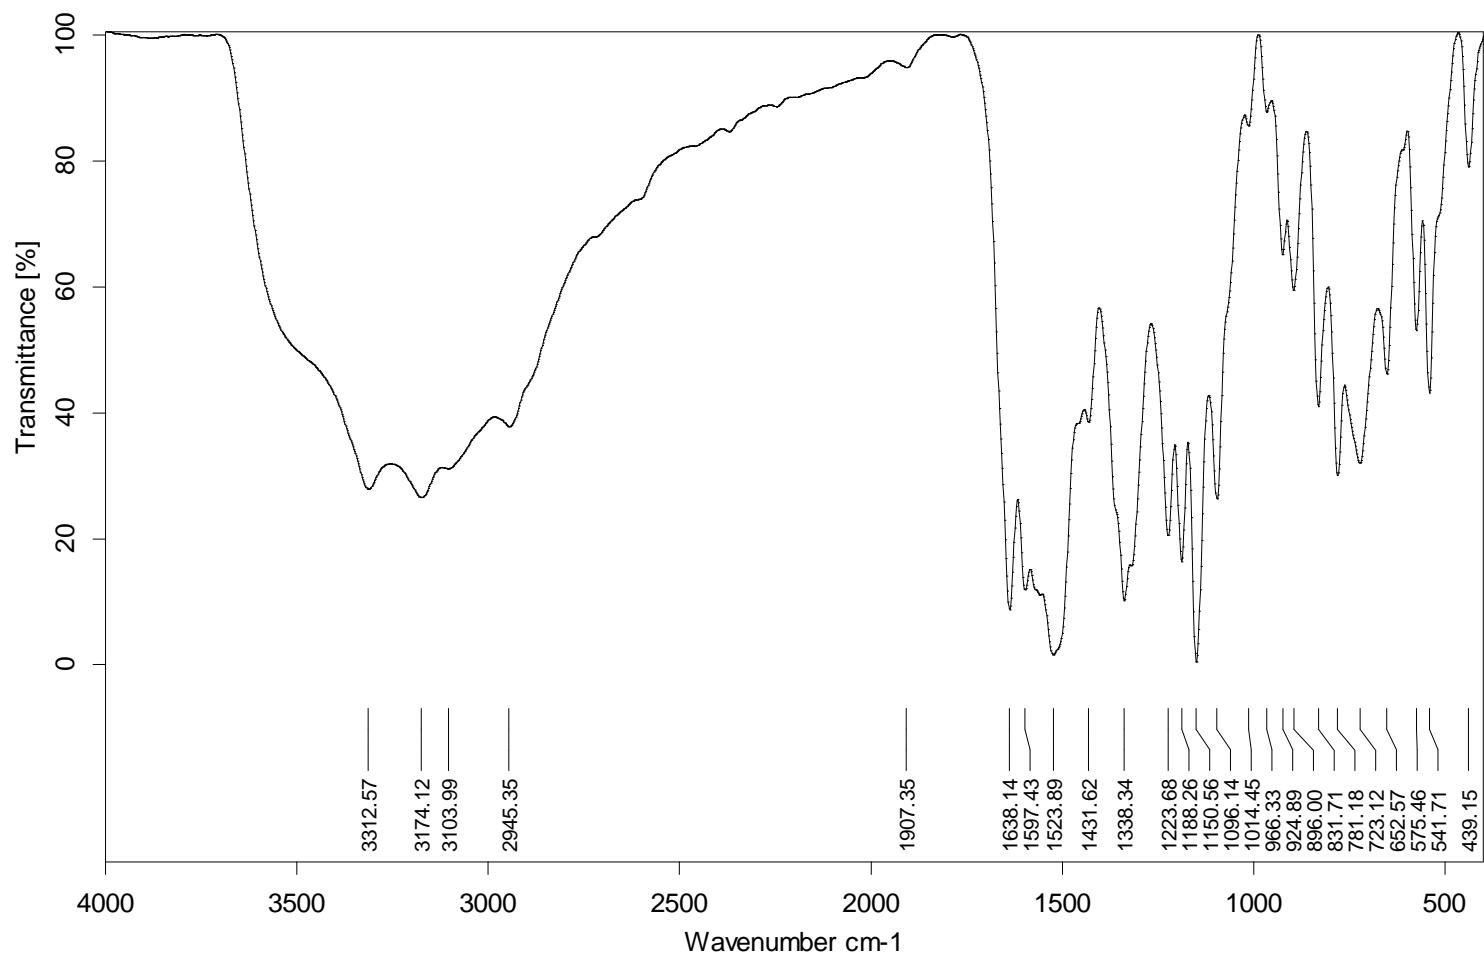

**Fig. 48** IR spectrum of **8**.

## 2. Equipment and analytical technique

All reactions were carried out in dried glassware. NMR spectra were measured using a JEOLJNM ECA 500. The deuterated solvent was used as an internal deuterium lock.  $^{13}\text{C}$  NMR spectra were recorded using the UDEFT pulse sequence and broad band proton decoupling at 125 MHz. All chemical shifts ( $\delta$ ) are stated in units of parts per million (ppm) and presented using TMS as the standard reference point. CHN analyses were performed using a Flash 2000 organic elemental analyzer. IR (KBr)  $\nu_{\text{max}}$  ( $\text{cm}^{-1}$ ) data were recorded using PerkinElmer; FT-IR Spectrum BX and Bruker tensor 37 FT-IR. Reaction time was Melting points were recorded using Thermo Scientific, Model NO: 1002D, 220-240v; 200 W; 50/60 Hz, and are uncorrected. Reaction time was monitored by TLC on Merck silica gel aluminum cards (0.2 mm thickness) with a fluorescent indicator at 254 nm. Visualization of the TLC during monitoring of the reaction was done by UV VILBER LOURMAT 4w-365 nm or 254 nm tube.

## 3. Biological procedures

### Antidiabetic activity

#### 4.3.1. Alpha-glucosidase inhibitory assay [1]

10  $\mu\text{L}$  of tested compound, acarbose (positive control) or DMSO (negative control) in microtiter plate wells were mixed with 110  $\mu\text{L}$  of diluted Bovine pancreatin enzyme (5 mg/0.5 mL in 0.1 M phosphate buffer at pH 7.4 then dilute 0.5 mL in 5 mL phosphate buffer). Microtiter plate wells were incubated at 37°C for 30 min. After incubation, 60  $\mu\text{L}$  of maltose (1% in distilled  $\text{H}_2\text{O}$ ) then incubated at 37°C for 20 min and 100  $\mu\text{L}$  of glucose kit reagent (Phosphate buffer (PB, 100 mM/L); Phenol (4 mM/L); 4-aminoantipyrine (AAP, 1 mM/L); Glucose oxidase (GOD, > 20 KU/L); Peroxidase (POD, >2 KU/L) and sodium azide ( $\text{NaN}_3$ , 8 mmol/L) were added to all wells (100  $\mu\text{L}$  of phosphate buffer was added in test blank only). The absorbance was measured at 490 nm using spectrophotometer. The  $\alpha$ -glucosidase inhibition activity of tested compound was expressed as  $\text{IC}_{50}$ .  $\text{IC}_{50}$  value (mg/mL) is the inhibitory concentration at which 50% of  $\alpha$ -glucosidase is repressed. It was calculated by interpolation from the graph of inhibition percentage against sample concentration using linear regression equations.

#### **4.3.2. Alpha- amylase inhibitory assay [2]**

10  $\mu\text{L}$  of tested compound, acarbose (positive control) or DMSO (negative control) in microtiter plate wells were mixed with 110  $\mu\text{L}$  of diluted Bovine pancreatin enzyme. Microtiter plate wells were incubated at  $37^\circ\text{C}$  for 30 min. After incubation, 60  $\mu\text{L}$  of Dextrin (1% in distilled  $\text{H}_2\text{O}$ ) then incubated at  $37^\circ\text{C}$  for 20 min and 100  $\mu\text{L}$  of glucose kit reagent (Phosphate buffer (PB, 100 mM/L); Phenol (4 mM/L); 4-amino-antipyrine (AAP, 1 mM/L); Glucose oxidase (GOD,  $> 20$  KU/L); Peroxidase (POD,  $>2$  KU/L) and Sodium azide ( $\text{NaN}_3$ , 8 mmol/L) were added to all wells (100  $\mu\text{L}$  of phosphate buffer was added in test blank only). The absorbance was measured at 490 nm using spectrophotometer. The  $\alpha$ -amylase inhibition activity of tested compound was expressed as  $\text{IC}_{50}$ .  $\text{IC}_{50}$  value (mg/mL) is the inhibitory concentration at which 50% of  $\alpha$ -amylase is repressed. It was calculated by interpolation from the graph of inhibition percentage against sample concentration using linear regression equations.

#### **4.3.3. Glucose uptake assay [3]**

Baker yeast was washed by centrifugation ( $3000 \times g$ , 5min) using distilled water until the supernatant was clear and 10 % (v/v) suspension was prepared in distilled water. 1mL of tested compound, berberine (positive control) or DMSO (negative control) added to 1 mL of glucose solution (25 mM in distilled water) and incubated for 10 min at  $37^\circ\text{C}$ . 100  $\mu\text{L}$  of yeast suspension was added and further incubated at  $37^\circ\text{C}$  for 60 min. All tubes were centrifuged ( $2500 \times g$ , 5min). The remaining glucose was estimated by glucose oxidase Peroxidase kit reagent in sample/ control tubes (phosphate buffer was added in sample blank tube) as described before. The glucose uptake of tested compound was expressed as  $\text{EC}_{50}$ .  $\text{EC}_{50}$  value (mg/mL) is the concentration at which the glucose uptake is increased by 50%. It was calculated by interpolation from the graph of glucose uptake percentage against sample concentration using linear regression equations.

4. 2D diagram and 3D representation of molecular docking of all compounds in the binding pocket (PDB: 2QMJ)

Table 1: 2D diagram and 3D representation of molecular docking of all compounds in the binding pocket (PDB: 2QMJ).

|    | 2D interactions | 3D interactions |
|----|-----------------|-----------------|
| 3j |                 |                 |
| 3f |                 |                 |

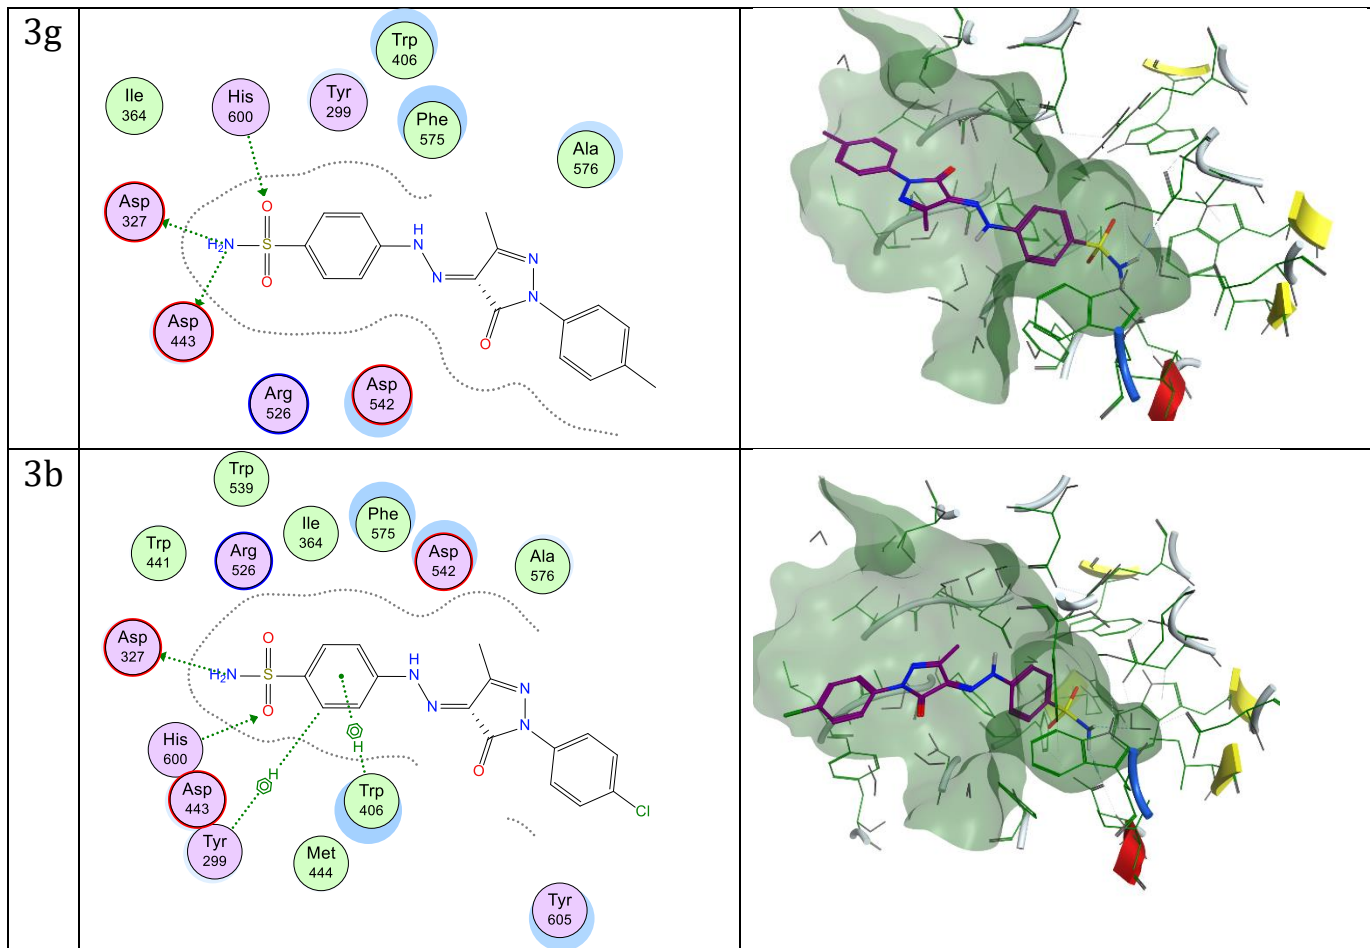

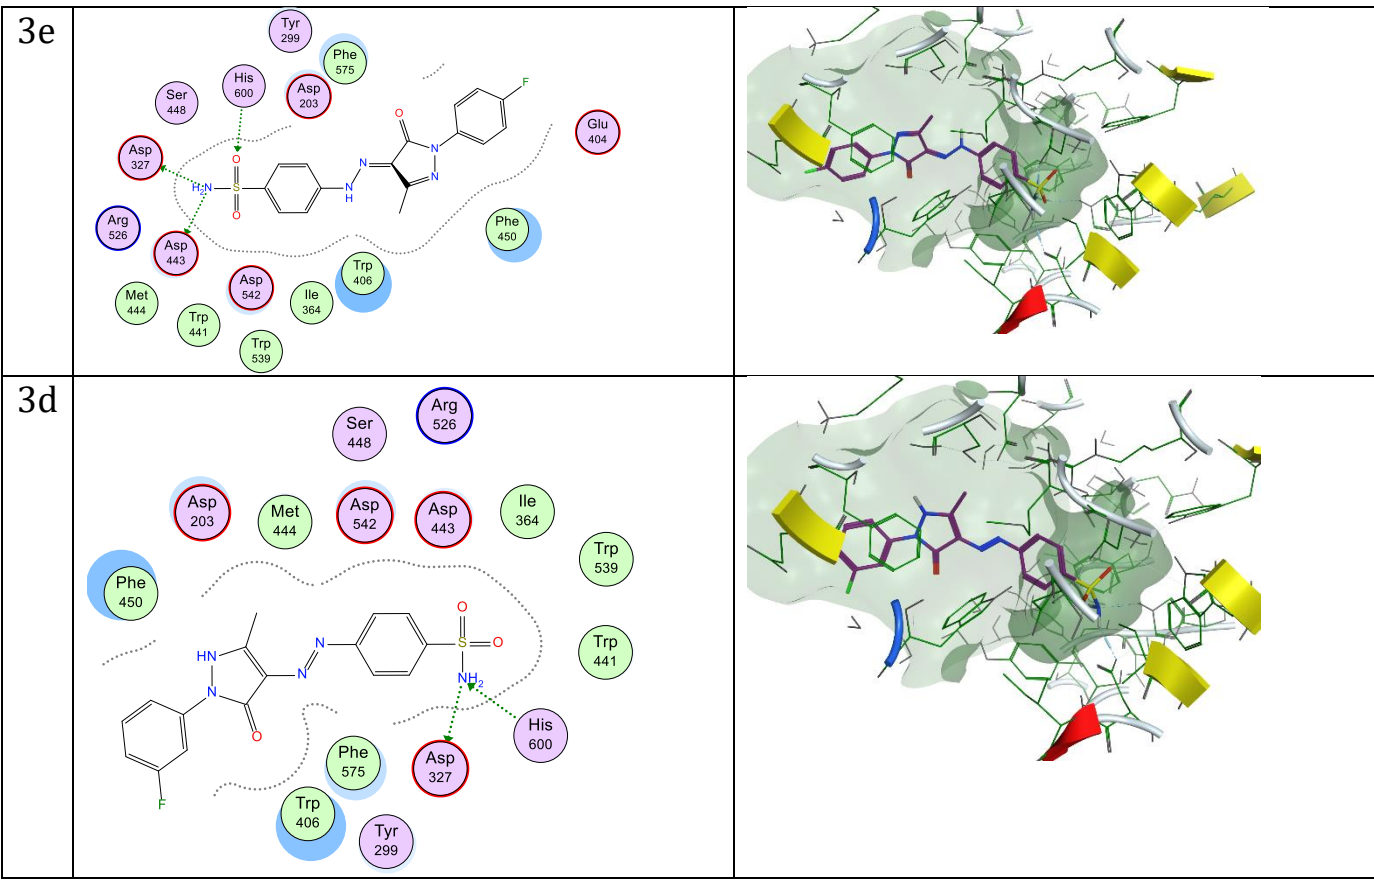

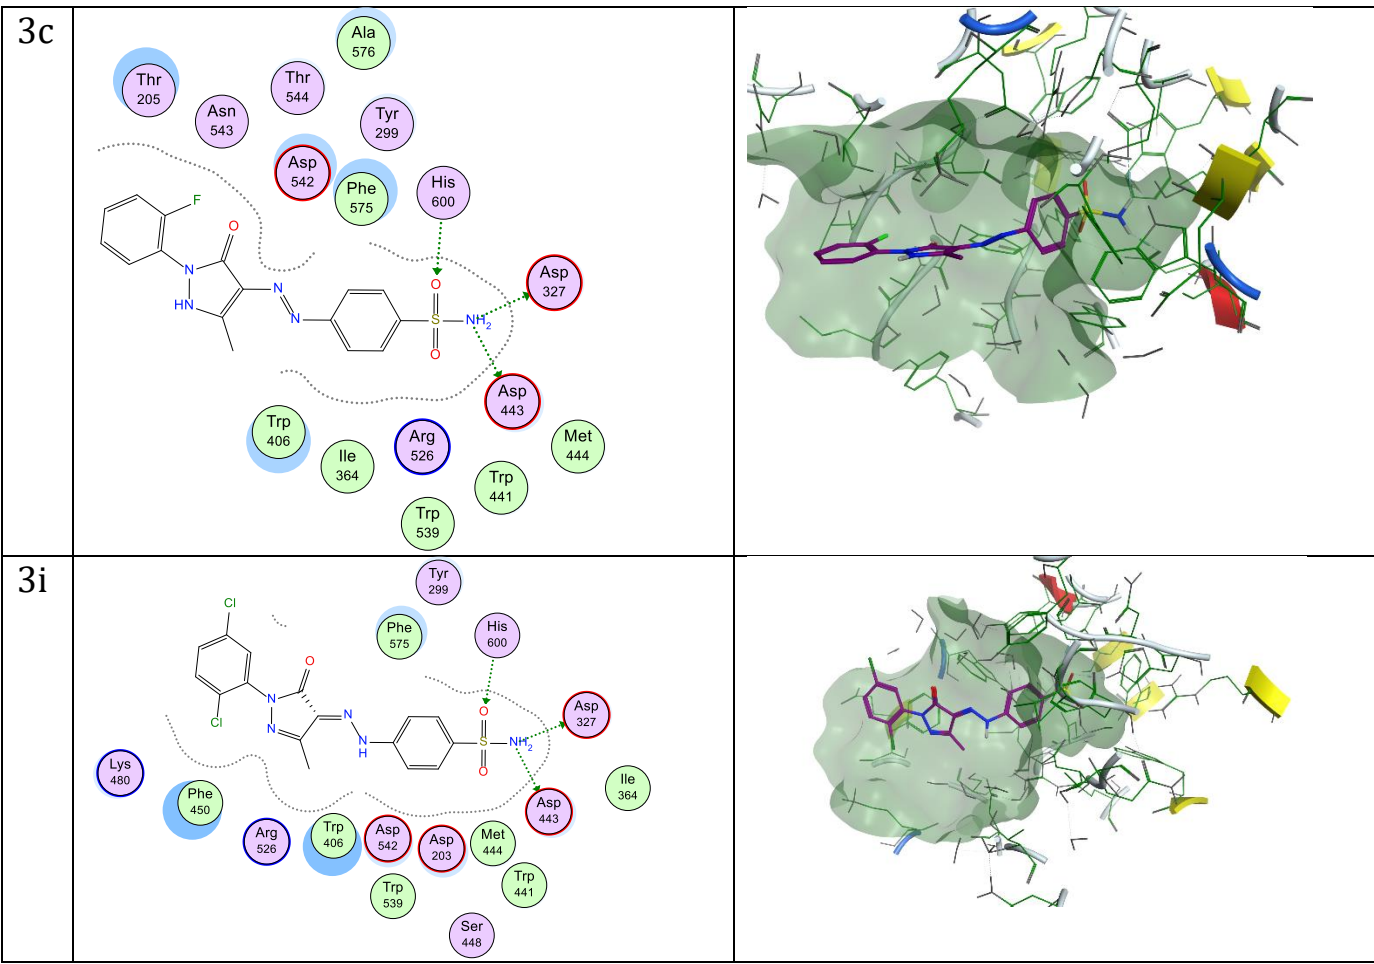



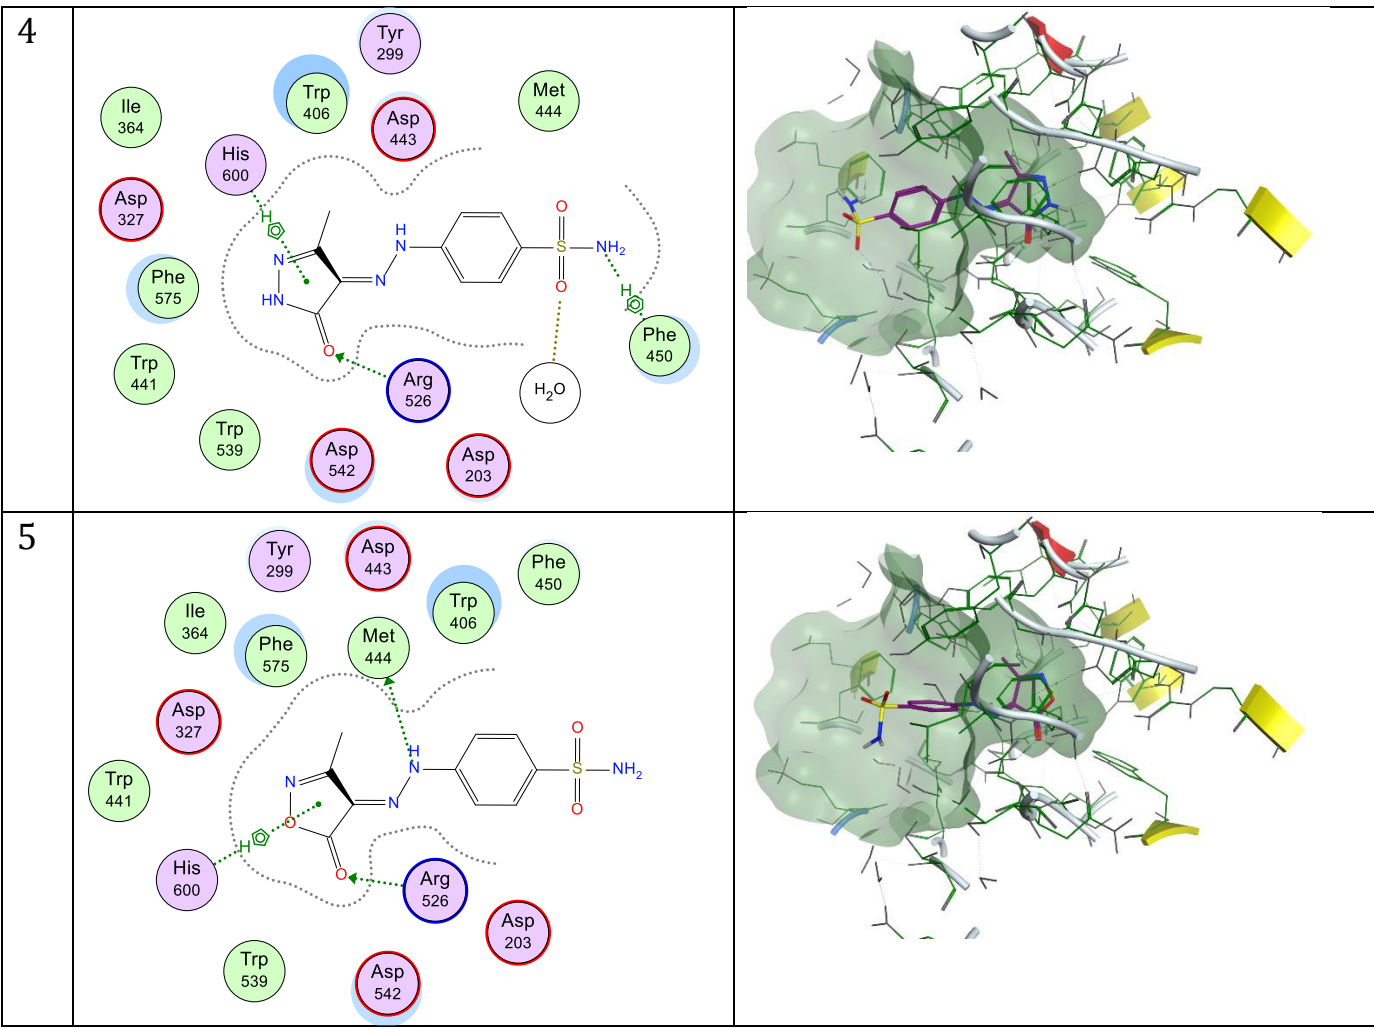

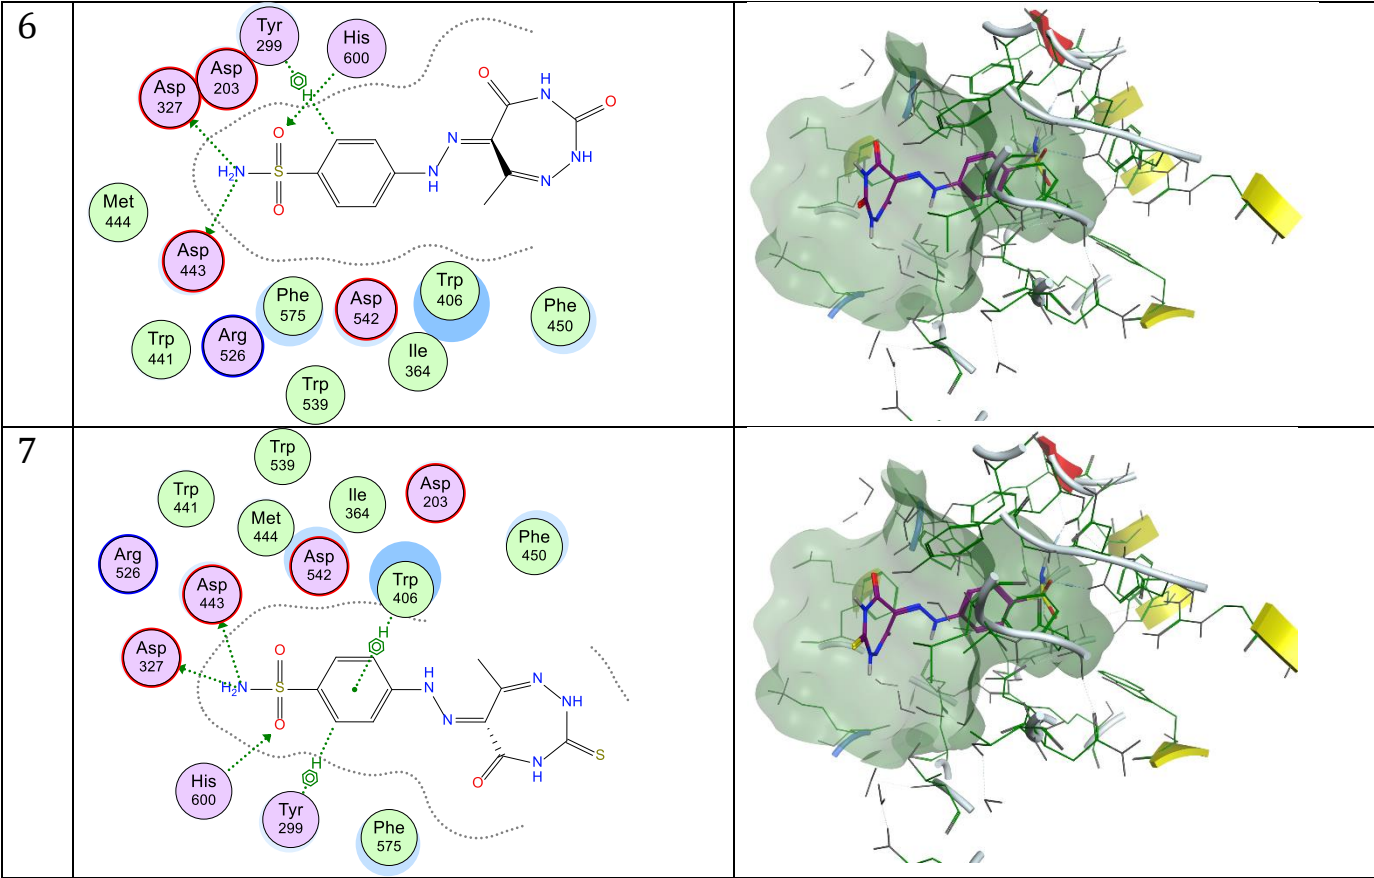

8

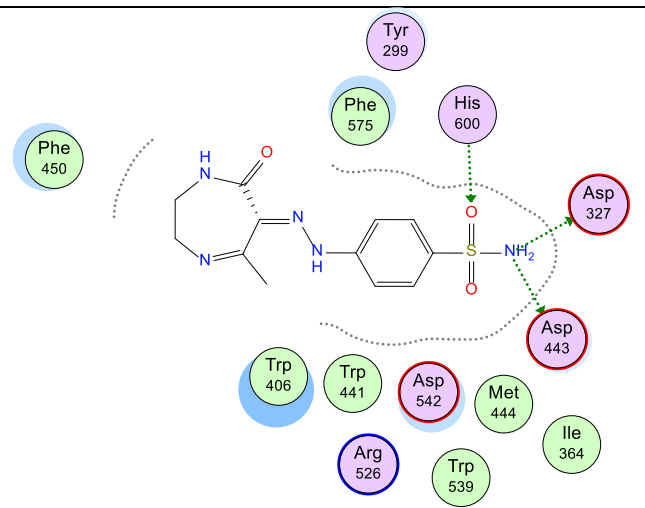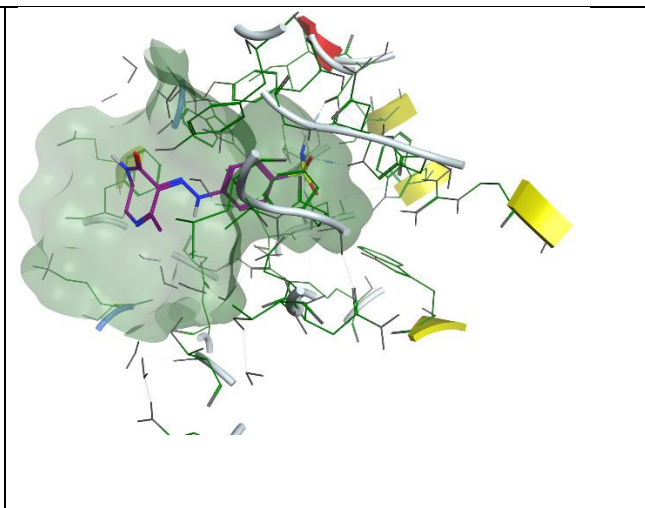

| <b>5. Biological activities detailed results</b> |                        |                       |                             |                                 |
|--------------------------------------------------|------------------------|-----------------------|-----------------------------|---------------------------------|
| <b>Sample Code</b>                               | <b>Samples (µg/mL)</b> | <b>Glucose uptake</b> | <b>% Amylase inhibition</b> | <b>% Glucosidase inhibition</b> |
| <b>6</b>                                         | 10                     | 27.73723±0.000935414  | 10.17274472±0.000359139     | 41.86046512±0.001238144         |
|                                                  | 50                     | 33.75912              | 11.13243762                 | 46.25322997                     |
|                                                  | 100                    | 38.50365              | 13.243762                   | 47.28682171                     |
|                                                  | 200                    | 39.9635               | 15.16314779                 | 52.97157623                     |
|                                                  | 500                    | 42.15328              | 19.96161228                 | 56.07235142                     |
|                                                  | <b>5</b>               | 10                    | 11.67883±0.000649615        | 5.75815739±0.001067303          |
| 50                                               |                        | 18.24818              | 9.404990403                 | 35.4005168                      |
| 100                                              |                        | 23.17518              | 14.77927063                 | 37.46770026                     |
| 200                                              |                        | 24.45255              | 35.8925144                  | 40.05167959                     |
| 500                                              |                        | 29.0146               | 36.27639155                 | 45.47803618                     |
| <b>3b</b>                                        |                        | 10                    | 27.37226±0.000912688        | 3.838771593±0.000262605         |
|                                                  | 50                     | 28.83212              | 7.293666027                 | 35.91731266                     |
|                                                  | 100                    | 29.37956              | 9.021113244                 | 39.27648579                     |
|                                                  | 200                    | 30.47445              | 10.3646833                  | 42.11886305                     |
|                                                  | 500                    | 34.30657              | 14.39539347                 | 52.19638243                     |
|                                                  | <b>3h</b>              | 10                    | 26.27737±0.000605805        | 5.75815739±0.000476546          |
| 50                                               |                        | 26.82482              | 6.525911708                 | 45.21963824                     |
| 100                                              |                        | 28.64964              | 8.637236084                 | 47.54521964                     |
| 200                                              |                        | 29.0146               | 10.3646833                  | 50.3875969                      |
| 500                                              |                        | 35.21898              | 12.85988484                 | 54.00516796                     |
| <b>3j</b>                                        |                        | 10                    | 4.927007±0.000416569        | 5.37428023±0.000286556          |
|                                                  | 50                     | 7.29927               | 11.13243762                 | 36.17571059                     |
|                                                  | 100                    | 8.941606              | 11.70825336                 | 41.60206718                     |
|                                                  | 200                    | 16.9708               | 13.05182342                 | 43.15245478                     |
|                                                  | 500                    | 25.18248              | 19.00191939                 | 60.98191214                     |
|                                                  | <b>3e</b>              | 10                    | 31.0219±0.00070214          | 6.525911708±0.000189785         |
| 50                                               |                        | 33.57664              | 8.253358925                 | 37.46770026                     |
| 100                                              |                        | 44.16058              | 11.13243762                 | 39.01808786                     |
| 200                                              |                        | 60.0365               | 13.243762                   | 41.86046512                     |
| 500                                              |                        | 70.9854               | 13.81957774                 | 42.37726098                     |
| <b>3a</b>                                        |                        | 10                    | 17.88321±0.000684376        | 22.6487524±0.000136057          |
|                                                  | 50                     | 21.53285              | 22.84069098                 | 36.69250646                     |
|                                                  | 100                    | 25.72993              | 23.03262956                 | 37.98449612                     |

|           |     |                             |                                |                                |
|-----------|-----|-----------------------------|--------------------------------|--------------------------------|
|           | 200 | 26.09489                    | 25.33589251                    | 40.05167959                    |
|           | 500 | 28.28467                    | 27.44721689                    | 50.12919897                    |
| <b>3d</b> | 10  | <b>29.0146±0.001213211</b>  | <b>16.89059501±0.000382964</b> | <b>25.06459948±0.000863134</b> |
|           | 50  | 35.40146                    | 18.04222649                    | 27.64857881                    |
|           | 100 | 38.86861                    | 18.42610365                    | 30.49095607                    |
|           | 200 | 39.59854                    | 19.19385797                    | 37.72609819                    |
|           | 500 | 39.78102                    | 20.92130518                    | 40.31007752                    |
| <b>3c</b> | 10  | <b>39.9635±0.000790569</b>  | <b>6.333973129±0.000334183</b> | <b>32.81653747±0.000577062</b> |
|           | 50  | 41.05839                    | 11.90019194                    | 34.88372093                    |
|           | 100 | 43.24818                    | 14.39539347                    | 38.50129199                    |
|           | 200 | 44.52555                    | 16.12284069                    | 42.63565891                    |
|           | 500 | 47.26277                    | 16.69865643                    | 45.73643411                    |
| <b>3f</b> | 10  | <b>36.67883±0.001104482</b> | <b>14.39539347±0.000238419</b> | <b>28.68217054±0.000696419</b> |
|           | 50  | 36.86131                    | 17.27447217                    | 31.00775194                    |
|           | 100 | 42.33577                    | 21.88099808                    | 33.33333333                    |
|           | 200 | 44.89051                    | 22.26487524                    | 40.31007752                    |
|           | 500 | 52.73723                    | 22.6487524                     | 44.18604651                    |
| <b>3i</b> | 10  | <b>44.89051±0.000998499</b> | <b>14.39539347±0.000264627</b> | <b>28.94056848±0.001095445</b> |
|           | 50  | 45.9854                     | 17.27447217                    | 30.74935401                    |
|           | 100 | 53.10219                    | 18.04222649                    | 33.33333333                    |
|           | 200 | 57.48175                    | 18.61804223                    | 35.14211886                    |
|           | 500 | 64.05109                    | 21.6890595                     | 38.50129199                    |
| <b>3g</b> | 10  | <b>39.59854±0.000981326</b> | <b>24.37619962±0.000929425</b> | <b>27.39018088±0.000878635</b> |
|           | 50  | 56.56934                    | 25.14395393                    | 32.04134367                    |
|           | 100 | 57.48175                    | 25.52783109                    | 35.14211886                    |
|           | 200 | 63.68613                    | 26.67946257                    | 38.50129199                    |
|           | 500 | 67.33577                    | 31.66986564                    | 44.44444444                    |
| <b>4</b>  | 10  | <b>27.91971±0.001379493</b> | <b>8.637236084±0.000273287</b> | <b>24.54780362±0.001167048</b> |
|           | 50  | 34.30657                    | 12.85988484                    | 29.71576227                    |
|           | 100 | 46.35036                    | 13.62763916                    | 37.98449612                    |
|           | 200 | 46.71533                    | 14.77927063                    | 38.75968992                    |
|           | 500 | 60.94891                    | 34.74088292                    | 39.01808786                    |

|          |     |                              |                                 |                                 |
|----------|-----|------------------------------|---------------------------------|---------------------------------|
| <b>7</b> | 10  | 43.79562± <b>0.000875785</b> | 11.90019194± <b>0.000742389</b> | 22.73901809± <b>0.000673053</b> |
|          | 50  | 46.89781                     | 13.81957774                     | 29.97416021                     |
|          | 100 | 53.83212                     | 15.54702495                     | 31.26614987                     |
|          | 200 | 65.14599                     | 17.46641075                     | 35.4005168                      |
|          | 500 | 81.56934                     | 19.57773512                     | 36.69250646                     |
| <b>8</b> | 10  | 23.54015± <b>0.001837662</b> | 9.596928983± <b>0.000227306</b> | 40.05167959± <b>0.00069857</b>  |
|          | 50  | 27.0073                      | 10.94049904                     | 40.82687339                     |
|          | 100 | 27.55474                     | 13.05182342                     | 45.99483204                     |
|          | 200 | 28.28467                     | 14.01151631                     | 47.80361757                     |
|          | 500 | 39.59854                     | 15.93090211                     | 65.89147287                     |

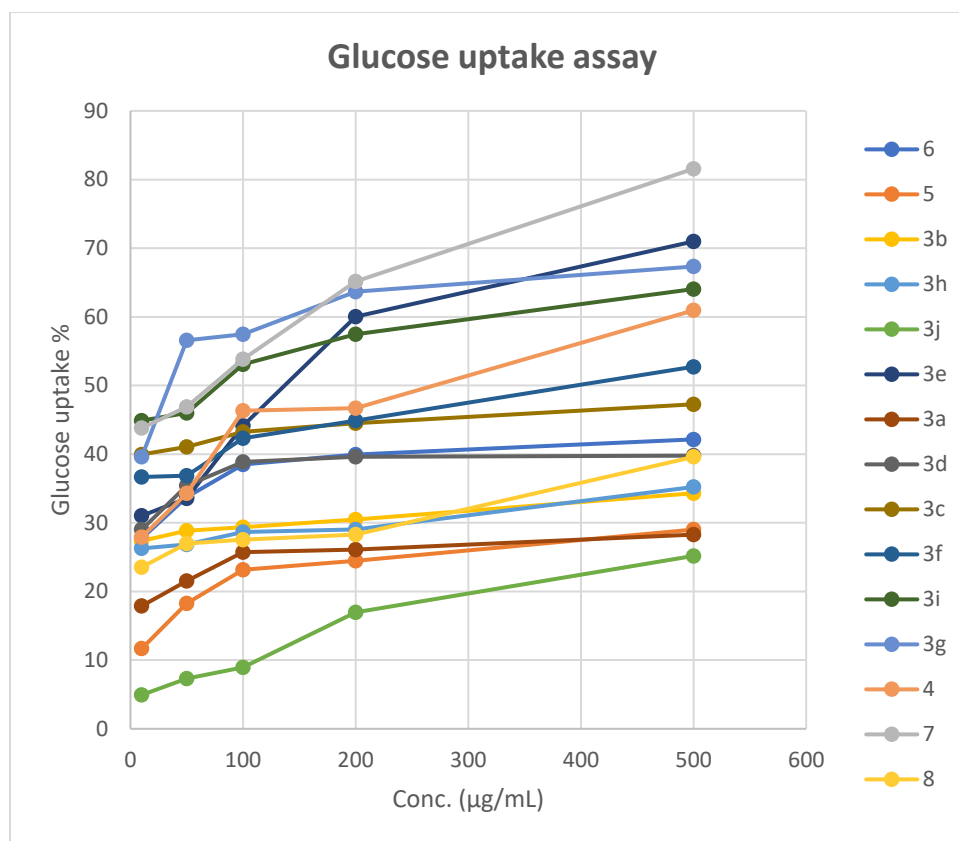

## 6. References

- [1] T. Matsui, C. Yoshimoto, K. Osajima, T. Oki, Y. Osajima, In Vitro Survey of  $\alpha$ -Glucosidase Inhibitory Food Components, *Biosci. Biotechnol. Biochem.* 60 (1996) 2019–2022. doi:10.1271/bbb.60.2019.
- [2] K. Lalitha, V.K. Kumar, In vitro study on  $\alpha$ -amylase inhibitory activity of an Ayurvedic medicinal plant, *Anacyclus pyrethrum* DC root, *Indian J. Pharmacol.* 46 (2014) 350. doi:10.4103/0253-7613.132204
- [3] V.P. Cirillo, MECHANISM OF GLUCOSE TRANSPORT ACROSS THE YEAST CELL MEMBRANE, *J. Bacteriol.* 84 (1962) 485–491. doi:10.1128/jb.84.3.485-491.1962.
